# Supplementary material for: Prediction of 1H NMR chemical shifts for ionic liquids: strategy and application of a relative reference standard
Source: Royal Society of Chemistry journal article supplement (doi:10.1039/c8ra04822c), 2018-01-01
Supplement: c8ra04822c1.pdf [file c8ra04822c1.pdf]

# **Prediction of $^1\text{H}$ NMR Chemical Shifts for Ionic Liquids: Strategy and Application of Relative Reference Standard**

Juanfang Wang, Ying Liu\*, Wen Li, and Guanjun Gao

*College of Chemistry and Chemical Engineering, Inner Mongolia University, Hohhot*

*010021, China*

## **SUPPLEMENTARY INFORMATION**

### **List of contents:**

|                                                    |              |
|----------------------------------------------------|--------------|
| - Test set of ionic liquids                        | page S2      |
| - Examples of the RRS approach                     | page S3–S4   |
| - Boltzmann averaging                              | page S5–S9   |
| - Calculation data of Table 1                      | page S10–S19 |
| - Calculation data of Tables 2&3                   | page S20–S30 |
| - Calculation of IL clusters                       | page S31–S35 |
| - Cartesian coordinates of optimized ionic liquids | page S36–S73 |
| - Effects of long alkyl chains on the prediction   | page S74–S76 |
| - Details of generalizing reference standard       | page S77–S79 |
| - Details on Case Study                            | page S80–S82 |

--Test set of ionic liquids

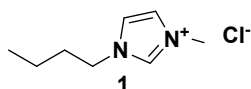

1-butyl-3-methylimidazolium chloride  
[C<sub>4</sub>mim]Cl

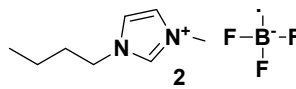

1-butyl-3-methylimidazolium tetrafluoroborate  
[C<sub>4</sub>mim][BF<sub>4</sub>]

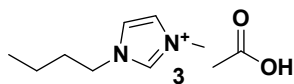

1-butyl-3-methylimidazolium acetate  
[C<sub>4</sub>mim][OAc]

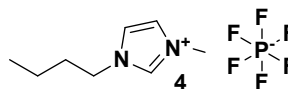

1-butyl-3-methylimidazolium hexafluorophosphate  
[C<sub>4</sub>mim][PF<sub>6</sub>]

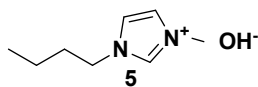

Hydroxide 1-butyl-3-methylimidazolium  
[C<sub>4</sub>mim]OH

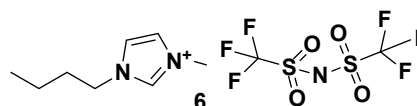

1-butyl-3-methylimidazolium bis(trifluoromethylsulfonyl)imide  
[C<sub>4</sub>mim][Tf<sub>2</sub>N]

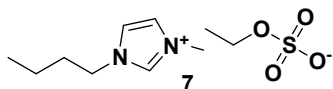

1-butyl-3-methylimidazolium ethylsulphate  
[C<sub>4</sub>mim][MeSO<sub>4</sub>]

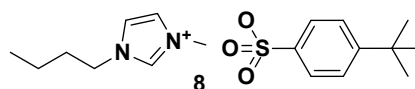

1-butyl-3-methylimidazolium tosylate  
[C<sub>4</sub>mim][OTs]

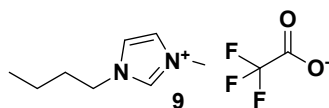

1-butyl-3-methylimidazolium trifluoroacetate  
[C<sub>4</sub>mim][TFA]

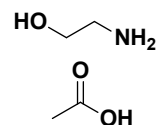

ethanolamine acetate

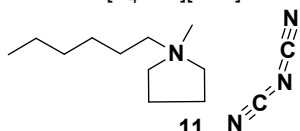

N-butyl-N-methylpyrrolidinium dicyanamide  
[P16][DCA]

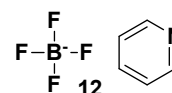

pyridine Tetrafluoroborate  
[py][BF<sub>4</sub>]

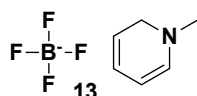

1-methylpyridine tetrafluoroborate  
[1-Me-py][BF<sub>4</sub>]

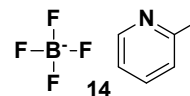

2-methylpyridine tetrafluoroborate  
[2-Me-py][BF<sub>4</sub>]

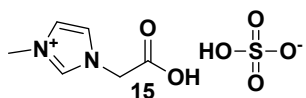

1-Carboxymethyl-3-methylimidazol-3-ium Hydrogen Sulfate  
[CMI][HSO<sub>4</sub>]

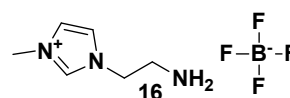

Amine 1-ethyl-3-methylimidazolium tetrafluoroborate  
[NH<sub>2</sub>-Emim][BF<sub>4</sub>]

Figure S1. A test set of ionic liquids

**--Example of the RRS approach for the calculation of [C<sub>4</sub>mim]Cl.**

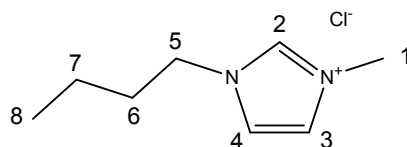

1-butyl-3-methylimidazolium chloride

**Scheme S1. Structure of 1-Butyl-3-methylimidazolium Chloride and 1-Methylimidazole with Hydrogen Atoms Numbered.**

(1) The organic molecule similar to the cation of the studied IL was used as the reference compound. In this case, 1-methylimidazole was employed as a corresponding reference compound.

(2) The <sup>1</sup>H absolute magnetic shielding values of H2', H3', and H4' protons in 1-methylimidazole ring were calculated at the certain level of theory.

(3) The shielding constants of [C<sub>4</sub>mim]Cl with a single ion pair were calculated at the same level as the 1-methylimidazole calculations.

(4) Once the shielding constants were computed, the <sup>1</sup>H NMR chemical shifts can be calculated in accordance with the following equation:

$$\delta_{calc}^x = \sigma_{ref,x} - \sigma_x + \delta_{ref,x}$$

(5) Where  $\sigma_{ref,x}$  and  $\sigma_x$  are the NMR isotropic magnetic shielding values. Generally, the  $x$  hydrogen atoms for the given molecule and for the reference compound have similar structure. And  $\delta_{ref,x}$  is the certain proton chemical shift of the reference compound in deuterated chloroform, which was taken from the Spectral Data Base for Organic Compounds (SDBS). For instance, the  $\delta_{calc}^{H2}$  of [C<sub>4</sub>mim]Cl would include the calculated values of  $\sigma_{1\text{-methylimidazole},H2'}$  and  $\sigma_{[C_4mim]Cl,H2}$ , and the experimental data of  $\delta_{1\text{-methylimidazole},H2'}$

(6) H3 and H4 calculations of [C<sub>4</sub>mim]Cl have the similar procedure of H2, but  $x$  in the equation should be replaced by H3 and H4, respectively. The -CH<sub>2</sub>- or -CH<sub>3</sub> hydrogens (H5-H8) in the [C<sub>4</sub>mim]<sup>+</sup> cation were calculated by using TMS ( $\delta=0.00$  ppm) as the reference compound.

## --Example of the RRS approach for the calculation of [C<sub>4</sub>mim][BF<sub>4</sub>].

Another example of the RRS approach exhibits as follows.

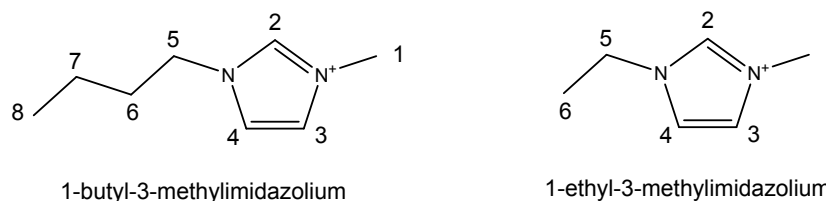

**Scheme S2. Structure of [C<sub>4</sub>mim][BF<sub>4</sub>] and [C<sub>2</sub>mim][BF<sub>4</sub>] with Hydrogen Atoms Numbered.**

$$\delta_{calc}^x = \sigma_{ref,x} - \sigma_x + \delta_{ref,x}$$

|    | $\sigma_{calc,x}$ | $\sigma_{ref,x}$ | $\delta_{ref,x}$ | $\delta_{calc,x}$ (RRS) | $\delta_{calc,x}$ (TMS) | $\delta_{exp,x}$ | RRS   | TMS   |
|----|-------------------|------------------|------------------|-------------------------|-------------------------|------------------|-------|-------|
| H2 | 22.525            | 22.864           | 8.55             | 8.89                    | 9.03                    | 8.77             | 0.118 | 0.259 |
| H3 | 23.791            | 23.862           | 7.35             | 7.42                    | 7.76                    | 7.63             | 0.208 | 0.133 |
| H4 | 23.665            | 23.937           | 7.41             | 7.68                    | 7.89                    | 7.69             | 0.008 | 0.199 |
| H1 | 27.715            | 27.520           | 4.14             | 3.95                    | 3.84                    | 4.04             | 0.094 | 0.200 |
| H5 | 27.351            | 27.574           | 3.84             | 4.06                    | 3.98                    | 4.32             | 0.257 | 0.339 |
| H6 | 29.773            | 27.574           | 3.84             | 1.64                    | 1.78                    | 1.93             | 0.288 | 0.148 |
| H7 | 30.0194           | 27.574           | 3.84             | 1.39                    | 1.53                    | 1.38             | 0.014 | 0.154 |
| H8 | 30.4186           | 29.869           | 1.41             | 0.86                    | 1.14                    | 0.94             | 0.079 | 0.195 |
|    |                   |                  |                  |                         |                         | RMS              | 0.167 | 0.214 |
|    |                   |                  |                  |                         |                         | MAE              | 0.134 | 0.204 |

Herein, the reference compound is [C<sub>2</sub>mim][BF<sub>4</sub>].  $\sigma_{ref,x}$  and  $\sigma_{calc,x}$  are the calculated magnetic shielding tensors of the reference compound and the studied IL, respectively.  $\delta_{calc,x}$  and  $\delta_{ref,x}$  are the calculated chemical shifts of the studied IL [C<sub>4</sub>mim][BF<sub>4</sub>] and the experimental chemical shifts of [C<sub>2</sub>mim][BF<sub>4</sub>], respectively.

According to the structure similarity, H1-H5 of [C<sub>4</sub>mim][BF<sub>4</sub>] can be calculated through  $\delta_{calc}^x = \sigma_{ref,x} - \sigma_x + \delta_{ref,x}$  directly. H6 and H7 of [C<sub>4</sub>mim][BF<sub>4</sub>] cannot be directly calculated by the above equation due to the absence of H6 and H7 in [C<sub>2</sub>mim][BF<sub>4</sub>]. But they can be obtained by using the values of H5 in [C<sub>2</sub>mim][BF<sub>4</sub>] because of their similar structures (-CH<sub>2</sub>-). Meanwhile, H8 of [C<sub>4</sub>mim][BF<sub>4</sub>] can be calculated through H6 of [C<sub>2</sub>mim][BF<sub>4</sub>] for their similar structures.

## --Boltzmann averaging

The Boltzmann distribution is generally defined as below.

$$P_i = \frac{n_i}{\sum n_j} = \frac{e^{-G_i/RT}}{\sum e^{-G_j/RT}} = \frac{Q_i}{Q_j}$$

Eq. 1

Furthermore, the equation 1 is mathematically equivalent to the equation 3 for calculating the Boltzmann distribution (probability) of the  $i$ -th configuration of the IL.

$$e^{-G_i/RT} = e^{-(\Delta G_i + G_{Reference})/RT} = C e^{-\Delta G_i/RT}$$

Eq. 2

$$P_i = \frac{n_i}{\sum n_j} = \frac{e^{-\Delta G_i/RT}}{\sum e^{-\Delta G_j/RT}} = \frac{Q_{i(Relative)}}{Q_{(Relative)}}$$

Eq. 3

In addition, Boltzmann averaging is defined as:

$$\delta_{obs} = \sum_i P_i \delta_i$$

Eq. 4

Where  $\Delta G_i$  is the free energy difference between the  $i$ -th configuration and the configuration with the minimal energy.

### Boltzmann averaging for [C<sub>4</sub>mim][BF<sub>4</sub>] configurations

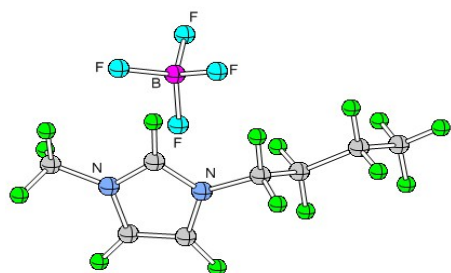

1

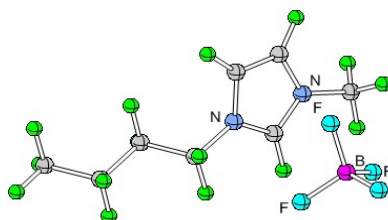

2

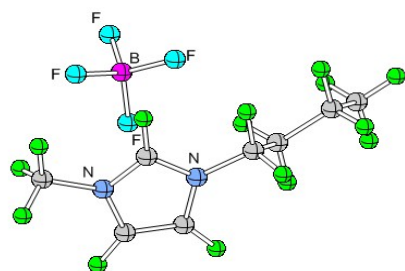

3

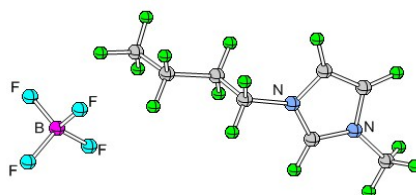

4

**Figure S2.** Four energetically preferred configurations of  $[\text{C}_4\text{mim}][\text{BF}_4]$

**Table S1. Boltzmann Distribution of Configurations for the IL  $[\text{C}_4\text{mim}][\text{BF}_4]$  at 298 K**

| Temperature (K)     | 298.15     | $Q_{(\text{Relative})}$  | 1.452892 |
|---------------------|------------|--------------------------|----------|
| Configuration index | $\Delta E$ | $Q_{i(\text{Relative})}$ | Percent  |
| 3                   | 0          | 1                        | 68.83%   |
| 2                   | 0.469      | 0.453                    | 31.17%   |
| 1                   | 10.238     | 0.000000                 | 0.00%    |
| 4                   | 21.027     | 0.000000                 | 0.00%    |

**Table S2. Calculated Proton Chemical Shifts for Different Configurations of  $[\text{C}_4\text{mim}][\text{BF}_4]^a$**

| Configuration   | $\sigma_{\text{calc},x}$ | $\delta_{\text{calc},x}$ (TMS) | $\delta_{\text{exp},x}$ | absolute errors |
|-----------------|--------------------------|--------------------------------|-------------------------|-----------------|
| Configuration 3 |                          |                                |                         |                 |
| H2              | 22.823                   | 8.731                          | 8.77                    | 0.039           |
| H3              | 23.885                   | 7.669                          | 7.63                    | 0.039           |
| H4              | 23.731                   | 7.823                          | 7.69                    | 0.133           |
| H1              | 27.521                   | 4.034                          | 4.04                    | 0.006           |
| H5              | 27.548                   | 4.006                          | 4.32                    | 0.314           |
| H6              | 29.782                   | 1.772                          | 1.93                    | 0.158           |
| H7              | 30.179                   | 1.376                          | 1.38                    | 0.004           |
| H8              | 30.394                   | 1.161                          | 0.94                    | 0.221           |
|                 |                          |                                | RMS                     | 0.155           |
|                 |                          |                                | MAE                     | 0.114           |
| Configuration 2 |                          |                                |                         |                 |
| H2              | 23.060                   | 8.494                          | 8.77                    | 0.276           |
| H3              | 23.842                   | 7.713                          | 7.63                    | 0.083           |
| H4              | 23.744                   | 7.811                          | 7.69                    | 0.121           |
| H1              | 27.505                   | 4.050                          | 4.04                    | 0.010           |

|                     |        |       |      |       |
|---------------------|--------|-------|------|-------|
| H5                  | 27.612 | 3.942 | 4.32 | 0.378 |
| H6                  | 29.891 | 1.664 | 1.93 | 0.266 |
| H7                  | 30.236 | 1.319 | 1.38 | 0.061 |
| H8                  | 30.208 | 1.346 | 0.94 | 0.406 |
|                     |        |       | RMS  | 0.245 |
|                     |        |       | MAE  | 0.200 |
| Boltzmann averaging |        |       |      |       |
| H2                  | 22.897 | 8.657 | 8.77 | 0.113 |
| H3                  | 23.871 | 7.683 | 7.63 | 0.053 |
| H4                  | 23.735 | 7.820 | 7.69 | 0.130 |
| H1                  | 27.516 | 4.039 | 4.04 | 0.001 |
| H5                  | 27.568 | 3.986 | 4.32 | 0.334 |
| H6                  | 29.816 | 1.738 | 1.93 | 0.192 |
| H7                  | 30.196 | 1.358 | 1.38 | 0.022 |
| H8                  | 30.336 | 1.219 | 0.94 | 0.279 |
|                     |        |       | RMS  | 0.179 |
|                     |        |       | MAE  | 0.140 |

<sup>a</sup> **m06-2x/aug-cc-pvdz** functional basis was used for geometry optimization and <sup>1</sup>H NMR calculations; reference compound was TMS.

### Boltzmann averaging for [C<sub>4</sub>mim][NTf<sub>2</sub>] configurations

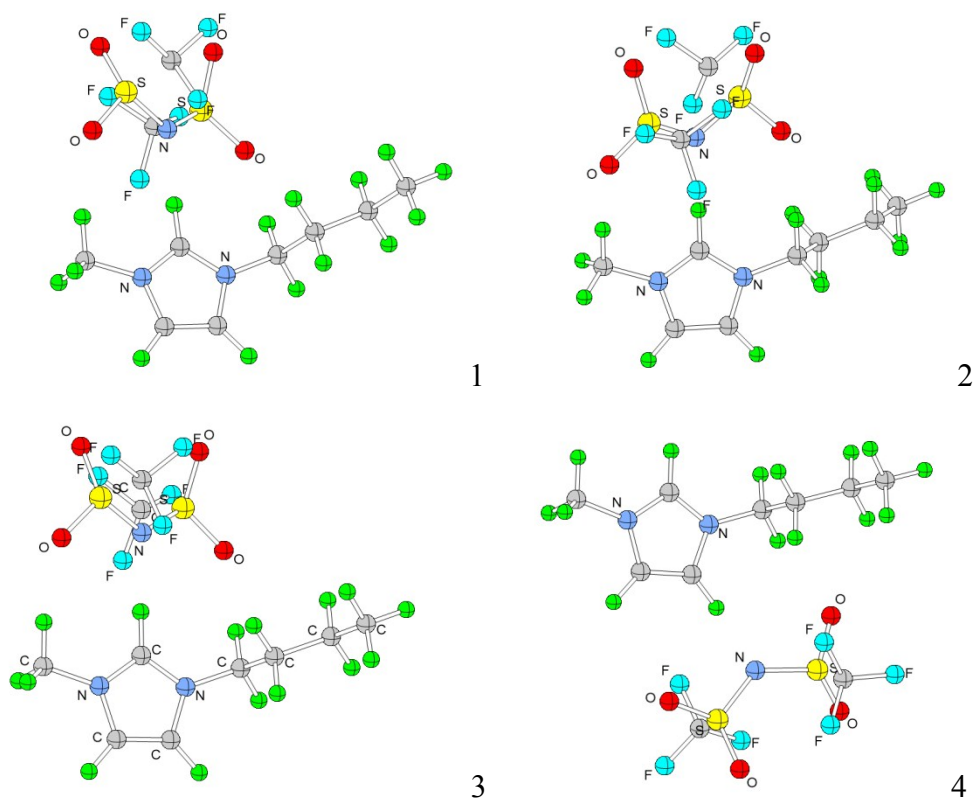

**Figure S3.** Four energetically preferred configurations of [C<sub>4</sub>mim][NTf<sub>2</sub>]

**Table S3. Boltzmann Distribution of Configurations for [C<sub>4</sub>mim][NTf<sub>2</sub>] at 298 K**

| Temperature (K)     | 298.15 | Q <sub>(Relative)</sub>  | 2.307   |
|---------------------|--------|--------------------------|---------|
| Configuration index | ΔE     | Q <sub>i(Relative)</sub> | Percent |
| 3                   | 0      | 1                        | 43.33%  |
| 1                   | 0.035  | 0.943                    | 40.88%  |
| 2                   | 0.598  | 0.364                    | 15.78%  |
| 4                   | 7.062  | 6.608E-06                | 0.0003% |

**Table S4. Calculated Proton Chemical Shifts for Different Configurations of [C<sub>4</sub>mim][NTf<sub>2</sub>]<sup>a</sup>**

| Configuration   | σ <sub>calc,x</sub> | δ <sub>calc,x</sub> (TMS) | δ <sub>exp,x</sub> | absolute errors |
|-----------------|---------------------|---------------------------|--------------------|-----------------|
| Configuration 3 |                     |                           |                    |                 |
| H2              | 19.834              | 11.720                    | 8.63               | 3.090           |
| H3              | 23.562              | 7.992                     | 7.54               | 0.452           |
| H4              | 23.784              | 7.770                     | 7.46               | 0.310           |
| H1              | 27.356              | 4.198                     | 4.24               | 0.042           |
| H5              | 27.080              | 4.475                     | 3.96               | 0.515           |
| H6              | 29.962              | 1.593                     | 1.92               | 0.327           |
| H7              | 30.216              | 1.338                     | 1.40               | 0.062           |
| H8              | 30.330              | 1.224                     | 0.97               | 0.254           |
|                 |                     |                           | RMS                | 1.134           |
|                 |                     |                           | MAE                | 0.632           |
| Configuration 1 |                     |                           |                    |                 |
| H2              | 19.834              | 11.721                    | 8.63               | 3.091           |
| H3              | 23.558              | 7.996                     | 7.54               | 0.456           |
| H4              | 23.785              | 7.769                     | 7.46               | 0.309           |
| H1              | 27.365              | 4.189                     | 4.24               | 0.051           |
| H5              | 27.082              | 4.472                     | 3.96               | 0.512           |
| H6              | 29.960              | 1.595                     | 1.92               | 0.325           |
| H7              | 30.217              | 1.337                     | 1.40               | 0.063           |
| H8              | 30.330              | 1.224                     | 0.97               | 0.254           |
|                 |                     |                           | RMS                | 1.134           |
|                 |                     |                           | MAE                | 0.633           |
| Configuration 2 |                     |                           |                    |                 |
| H2              | 19.841              | 11.714                    | 8.63               | 3.084           |
| H3              | 23.691              | 7.863                     | 7.54               | 0.323           |
| H4              | 23.546              | 8.008                     | 7.46               | 0.548           |
| H1              | 27.248              | 4.306                     | 4.24               | 0.066           |
| H5              | 27.062              | 4.493                     | 3.96               | 0.533           |
| H6              | 29.890              | 1.664                     | 1.92               | 0.256           |



|                     |        |        |      |       |
|---------------------|--------|--------|------|-------|
| H7                  | 30.249 | 1.306  | 1.40 | 0.095 |
| H8                  | 30.294 | 1.261  | 0.97 | 0.291 |
|                     |        |        | RMS  | 1.138 |
|                     |        |        | MAE  | 0.649 |
| Boltzmann averaging |        |        |      |       |
| H2                  | 19.833 | 11.722 | 8.63 | 3.092 |
| H3                  | 23.579 | 7.976  | 7.54 | 0.436 |
| H4                  | 23.745 | 7.810  | 7.46 | 0.350 |
| H1                  | 27.340 | 4.214  | 4.24 | 0.026 |
| H5                  | 27.075 | 4.479  | 3.96 | 0.519 |
| H6                  | 29.947 | 1.608  | 1.92 | 0.312 |
| H7                  | 30.219 | 1.336  | 1.40 | 0.065 |
| H8                  | 30.321 | 1.233  | 0.97 | 0.263 |
|                     |        |        | RMS  | 1.135 |
|                     |        |        | MAE  | 0.633 |

<sup>a</sup> **m06-2x/aug-cc-pvdz** functional basis was used for geometry optimization and <sup>1</sup>H NMR calculations; reference compound was TMS.

--Calculation data of Table 1

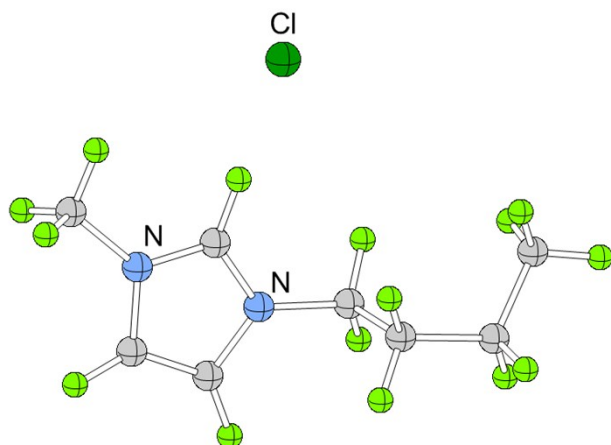

Figure S4. Structure of [C<sub>4</sub>mim]Cl

Table S5. Calculated <sup>1</sup>H NMR Chemical Shifts of [C<sub>4</sub>mim]Cl

| H                                       | $\sigma_{\text{cal}}$ | $\sigma_{\text{ref}}$ | $\delta_{\text{ref}}$ | $\delta_{\text{cal}}$ (RRS) | $\delta_{\text{cal}}$ (TMS) | $\delta_{\text{exp}}$ | AE (RRS) | AE (TMS) |
|-----------------------------------------|-----------------------|-----------------------|-----------------------|-----------------------------|-----------------------------|-----------------------|----------|----------|
| H2                                      | 19.162                | 23.567                | 7.385                 | 11.790                      | 12.530                      | 8.630                 | 3.160    | 3.900    |
| H3                                      | 24.077                | 24.053                | 7.011                 | 7.035                       | 7.616                       | 7.540                 | 0.505    | 0.076    |
| H4                                      | 23.975                | 24.000                | 6.863                 | 6.888                       | 7.718                       | 7.460                 | 0.572    | 0.258    |
| H1                                      | 27.779                | 27.919                | 3.641                 | 3.782                       | 3.914                       | 4.240                 | 0.459    | 0.326    |
| H5                                      | 27.144                |                       |                       |                             | 4.549                       | 3.960                 |          | 0.589    |
| H6                                      | 30.037                |                       |                       |                             | 1.656                       | 1.920                 |          | 0.264    |
| H7                                      | 30.345                |                       |                       |                             | 1.347                       | 1.400                 |          | 0.053    |
| H8                                      | 32.154                |                       |                       |                             | 0.462                       | 0.970                 |          | 0.508    |
| reference compound: 1-methylimidazole   |                       |                       |                       |                             | RMS, ppm                    |                       | 1.197    | 1.417    |
| level of theory: <b>mp2/aug-cc-pvdz</b> |                       |                       |                       |                             | MAE, ppm                    |                       | 0.764    | 0.747    |

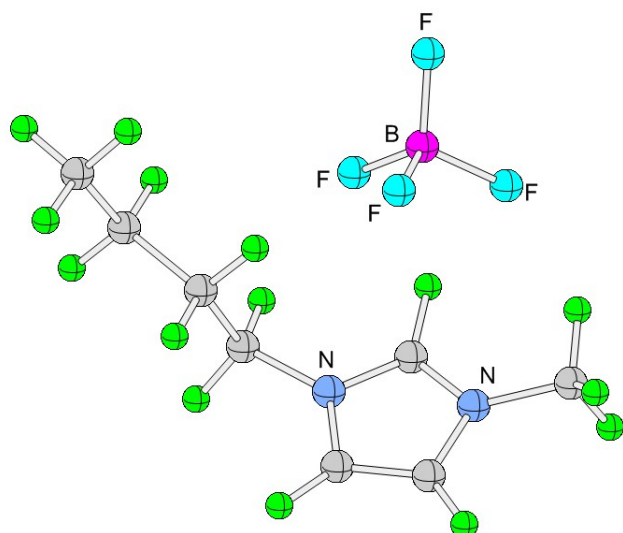

**Figure S5.** Structure of  $[\text{C}_4\text{mim}][\text{BF}_4]$

**Table S6.** Calculated  $^1\text{H}$  NMR Chemical Shifts of  $[\text{C}_4\text{mim}][\text{BF}_4]$

| H                                       | $\sigma_{\text{cal}}$ | $\sigma_{\text{ref}}$ | $\delta_{\text{ref}}$ | $\delta_{\text{cal}}$ (RRS) | $\delta_{\text{cal}}$ (TMS) | $\delta_{\text{exp}}$ | AE (RRS) | AE (TMS) |
|-----------------------------------------|-----------------------|-----------------------|-----------------------|-----------------------------|-----------------------------|-----------------------|----------|----------|
| H2                                      | 21.892                | 23.567                | 7.385                 | 9.060                       | 9.801                       | 8.630                 | 0.430    | 1.171    |
| H3                                      | 24.357                | 24.053                | 7.011                 | 7.315                       | 7.336                       | 7.540                 | 0.225    | 0.204    |
| H4                                      | 24.323                | 24.000                | 6.863                 | 7.187                       | 7.370                       | 7.460                 | 0.273    | 0.090    |
| H1                                      | 27.810                | 27.919                | 3.641                 | 3.750                       | 3.882                       | 4.240                 | 0.490    | 0.358    |
| H5                                      | 28.532                |                       |                       |                             | 3.161                       | 3.960                 |          | 0.799    |
| H6                                      | 30.158                |                       |                       |                             | 1.535                       | 1.920                 |          | 0.385    |
| H7                                      | 30.661                |                       |                       |                             | 1.032                       | 1.400                 |          | 0.368    |
| H8                                      | 30.878                |                       |                       |                             | 0.814                       | 0.970                 |          | 0.156    |
| reference compound: 1-methylimidazole   |                       |                       |                       |                             | RMS, ppm                    |                       | 0.371    | 0.558    |
| level of theory: <b>mp2/aug-cc-pvdz</b> |                       |                       |                       |                             | MAE, ppm                    |                       | 0.354    | 0.441    |

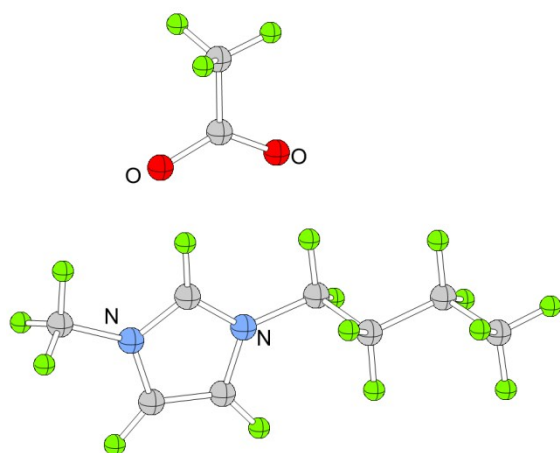

**Figure S6.** Structure of  $[\text{C}_4\text{mim}][\text{OAc}]$

**Table S7. Calculated  $^1\text{H}$  NMR Chemical Shifts of  $[\text{C}_4\text{mim}][\text{OAc}]$** 

| H                                          | $\sigma_{\text{cal}}$ | $\sigma_{\text{ref}}$ | $\delta_{\text{ref}}$ | $\delta_{\text{cal}}$ (RRS) | $\delta_{\text{cal}}$ (TMS) | $\delta_{\text{exp}}$ | AE (RRS) | AE (TMS) |
|--------------------------------------------|-----------------------|-----------------------|-----------------------|-----------------------------|-----------------------------|-----------------------|----------|----------|
| H2                                         | 17.735                | 23.661                | 7.385                 | 13.311                      | 13.819                      | 10.18                 | 3.131    | 3.639    |
| H3                                         | 23.816                | 23.832                | 7.011                 | 7.027                       | 7.738                       | 7.880                 | 0.853    | 0.142    |
| H4                                         | 23.709                | 23.758                | 6.863                 | 6.912                       | 7.845                       | 7.960                 | 1.048    | 0.115    |
| H1                                         | 27.298                | 27.653                | 3.641                 | 3.996                       | 4.256                       | 4.200                 | 0.204    | 0.056    |
| H5                                         | 26.954                | 27.653                | 3.641                 | 4.341                       | 4.601                       | 3.890                 | 0.451    | 0.711    |
| H6                                         | 29.882                | 27.653                | 3.641                 | 1.412                       | 1.672                       | 1.600                 | 0.188    | 0.072    |
| H7                                         | 30.178                | 27.653                | 3.641                 | 1.116                       | 1.376                       | 1.210                 | 0.094    | 0.166    |
| H8                                         | 30.422                | 27.653                | 3.641                 | 0.872                       | 1.132                       | 0.840                 | 0.032    | 0.292    |
| reference compound: 1-methylimidazole      |                       |                       |                       |                             | RMS, ppm                    |                       | 1.221    | 1.318    |
| level of theory: <b>m06-2x/aug-cc-pvdz</b> |                       |                       |                       |                             | MAE, ppm                    |                       | 0.750    | 0.649    |

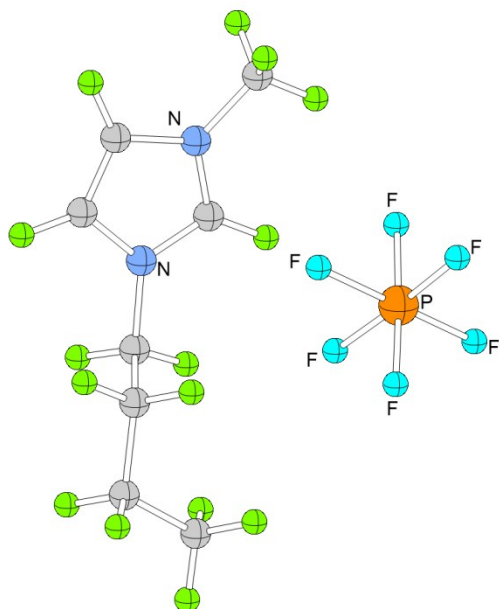**Figure S7. Structure of  $[\text{C}_4\text{mim}][\text{PF}_6]$** **Table S8. Calculated  $^1\text{H}$  NMR Chemical Shifts of  $[\text{C}_4\text{mim}][\text{PF}_6]$** 

| H                                          | $\sigma_{\text{cal}}$ | $\sigma_{\text{ref}}$ | $\delta_{\text{ref}}$ | $\delta_{\text{cal}}$ (RRS) | $\delta_{\text{cal}}$ (TMS) | $\delta_{\text{exp}}$ | AE (RRS) | AE (TMS) |
|--------------------------------------------|-----------------------|-----------------------|-----------------------|-----------------------------|-----------------------------|-----------------------|----------|----------|
| H2                                         | 22.952                | 23.661                | 7.385                 | 8.094                       | 8.603                       | 8.520                 | 0.426    | 0.083    |
| H3                                         | 23.677                | 23.832                | 7.011                 | 7.166                       | 7.878                       | 7.490                 | 0.324    | 0.388    |
| H4                                         | 23.737                | 23.758                | 6.863                 | 6.884                       | 7.817                       | 7.520                 | 0.636    | 0.297    |
| H1                                         | 27.432                | 27.653                | 3.641                 | 3.862                       | 4.123                       | 4.250                 | 0.388    | 0.127    |
| H5                                         | 27.193                | 27.653                | 3.641                 | 4.101                       | 4.362                       | 3.970                 | 0.131    | 0.392    |
| H6                                         | 29.604                | 27.653                | 3.641                 | 1.690                       | 1.950                       | 1.930                 | 0.240    | 0.020    |
| H7                                         | 30.634                | 27.653                | 3.641                 | 0.660                       | 0.920                       | 1.380                 | 0.720    | 0.460    |
| H8                                         | 30.463                | 27.653                | 3.641                 | 0.831                       | 1.091                       | 0.940                 | 0.109    | 0.151    |
| reference compound: 1-methylimidazole      |                       |                       |                       |                             | RMS, ppm                    |                       | 0.425    | 0.285    |
| level of theory: <b>m06-2x/aug-cc-pvdz</b> |                       |                       |                       |                             | MAE, ppm                    |                       | 0.372    | 0.240    |

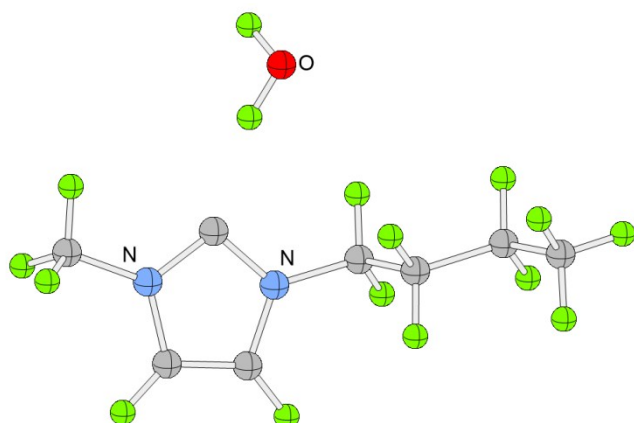

**Figure S8.** Structure of [C<sub>4</sub>mim]OH

**Table S9.** Calculated <sup>1</sup>H NMR Chemical Shifts of [C<sub>4</sub>mim]OH

| H                                          | $\sigma_{\text{cal}}$ | $\sigma_{\text{ref}}$ | $\delta_{\text{ref}}$ | $\delta_{\text{cal}}$ (RRS) | $\delta_{\text{cal}}$ (TMS) | $\delta_{\text{exp}}$ | AE (RRS) | AE (TMS) |
|--------------------------------------------|-----------------------|-----------------------|-----------------------|-----------------------------|-----------------------------|-----------------------|----------|----------|
| H2                                         | 23.661                | 24.614                | 7.385                 | 8.338                       | 7.893                       | 9.270                 | 0.932    | 1.377    |
| H3                                         | 23.779                | 23.832                | 7.011                 | 7.064                       | 7.775                       | 7.820                 | 0.756    | 0.045    |
| H4                                         | 23.742                | 23.758                | 6.863                 | 6.879                       | 7.812                       | 7.750                 | 0.871    | 0.062    |
| H1                                         | 27.325                | 27.653                | 3.641                 | 3.969                       | 4.229                       | 4.200                 | 0.231    | 0.029    |
| H5                                         | 27.564                | 27.653                | 3.641                 | 3.730                       | 3.990                       | 3.860                 | 0.130    | 0.130    |
| H6                                         | 30.093                | 27.653                | 3.641                 | 1.201                       | 1.461                       | 1.780                 | 0.579    | 0.319    |
| H7                                         | 30.189                | 27.653                | 3.641                 | 1.105                       | 1.365                       | 1.250                 | 0.145    | 0.115    |
| H8                                         | 30.419                | 27.653                | 3.641                 | 0.875                       | 1.136                       | 0.900                 | 0.025    | 0.236    |
| reference compound: 1-methylimidazole      |                       |                       |                       |                             | RMS, ppm                    |                       | 0.573    | 0.511    |
| level of theory: <b>m06-2x/aug-cc-pvdz</b> |                       |                       |                       |                             | MAE, ppm                    |                       | 0.459    | 0.289    |

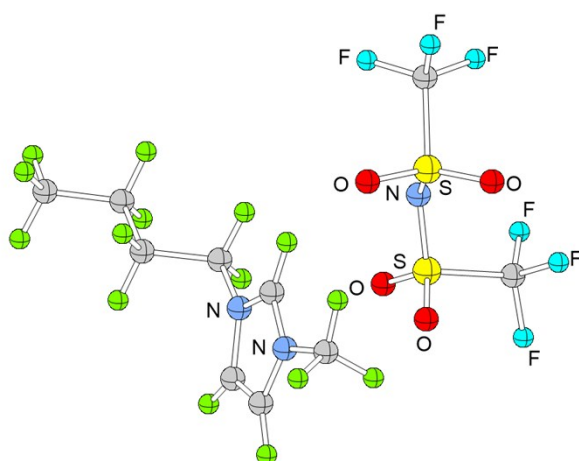

**Figure S9.** Structure of [C<sub>4</sub>mim][Tf<sub>2</sub>N]

**Table S10.** Calculated <sup>1</sup>H NMR Chemical Shifts of [C<sub>4</sub>mim][Tf<sub>2</sub>N]

| H                                          | $\sigma_{\text{cal}}$ | $\sigma_{\text{ref}}$ | $\delta_{\text{ref}}$ | $\delta_{\text{cal}}$ (RRS) | $\delta_{\text{cal}}$ (TMS) | $\delta_{\text{exp}}$ | AE (RRS) | AE (TMS) |
|--------------------------------------------|-----------------------|-----------------------|-----------------------|-----------------------------|-----------------------------|-----------------------|----------|----------|
| H2                                         | 19.834                | 23.661                | 7.385                 | 11.212                      | 11.720                      | 8.630                 | 2.582    | 3.090    |
| H3                                         | 23.562                | 23.832                | 7.011                 | 7.281                       | 7.992                       | 7.540                 | 0.259    | 0.452    |
| H4                                         | 23.784                | 23.758                | 6.863                 | 6.837                       | 7.770                       | 7.460                 | 0.623    | 0.310    |
| H1                                         | 27.356                | 27.678                | 3.641                 | 3.963                       | 4.198                       | 4.240                 | 0.277    | 0.042    |
| H5                                         | 27.080                |                       |                       | 4.475                       | 4.475                       | 3.960                 | 0.515    | 0.515    |
| H6                                         | 29.962                |                       |                       | 1.593                       | 1.593                       | 1.920                 | 0.327    | 0.327    |
| H7                                         | 30.216                |                       |                       | 1.338                       | 1.338                       | 1.400                 | 0.062    | 0.062    |
| H8                                         | 30.330                |                       |                       | 1.224                       | 1.224                       | 0.970                 | 0.254    | 0.254    |
| reference compound: 1-methylimidazole      |                       |                       |                       |                             | RMS, ppm                    |                       | 0.977    | 1.134    |
| level of theory: <b>m06-2x/aug-cc-pvdz</b> |                       |                       |                       |                             | MAE, ppm                    |                       | 0.612    | 0.632    |

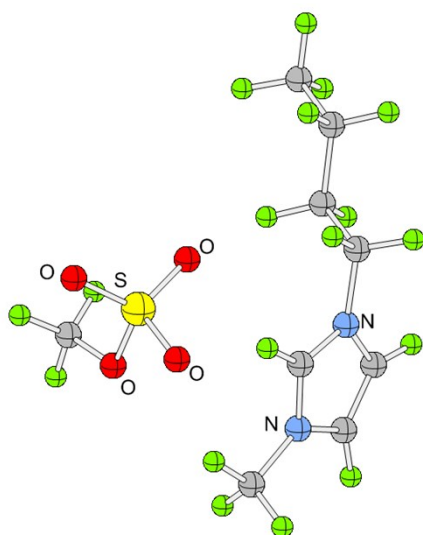

**Figure S10.** Structure of  $[\text{C}_4\text{mim}][\text{MeSO}_4]$

**Table S11. Calculated  $^1\text{H}$  NMR Chemical Shifts of  $[\text{C}_4\text{mim}][\text{MeSO}_4]$**

| H                                          | $\sigma_{\text{cal}}$ | $\sigma_{\text{ref}}$ | $\delta_{\text{ref}}$ | $\delta_{\text{cal}}$ (RRS) | $\delta_{\text{cal}}$ (TMS) | $\delta_{\text{exp}}$ | AE (RRS) | AE (TMS) |
|--------------------------------------------|-----------------------|-----------------------|-----------------------|-----------------------------|-----------------------------|-----------------------|----------|----------|
| H2                                         | 20.987                | 23.661                | 7.385                 | 10.059                      | 10.567                      | 9.418                 | 0.641    | 1.149    |
| H3                                         | 23.831                | 23.832                | 7.011                 | 7.012                       | 7.723                       | 7.630                 | 0.618    | 0.093    |
| H4                                         | 23.681                | 23.758                | 6.863                 | 6.940                       | 7.874                       | 7.580                 | 0.640    | 0.294    |
| H1                                         | 27.482                | 27.653                | 3.641                 | 3.812                       | 4.072                       | 4.260                 | 0.448    | 0.188    |
| H5                                         | 27.232                | 27.653                | 3.641                 | 4.062                       | 4.323                       | 3.370                 | 0.692    | 0.953    |
| H6                                         | 29.986                | 27.653                | 3.641                 | 1.308                       | 1.568                       | 1.881                 | 0.573    | 0.313    |
| H7                                         | 30.113                | 27.653                | 3.641                 | 1.181                       | 1.441                       | 1.352                 | 0.171    | 0.089    |
| H8                                         | 30.410                | 27.653                | 3.641                 | 0.884                       | 1.144                       | 0.935                 | 0.051    | 0.209    |
| reference compound: 1-methylimidazole      |                       |                       |                       |                             | RMS, ppm                    |                       | 0.530    | 0.560    |
| level of theory: <b>m06-2x/aug-cc-pvdz</b> |                       |                       |                       |                             | MAE, ppm                    |                       | 0.479    | 0.411    |

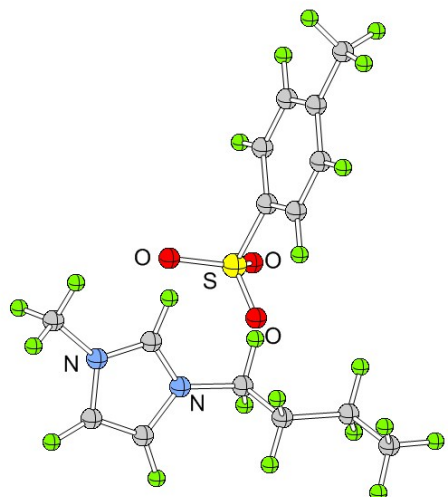

**Figure S11.** Structure of [C<sub>4</sub>mim][OTS]

**Table S12.** Calculated <sup>1</sup>H NMR Chemical Shifts of [C<sub>4</sub>mim][OTS]

| H                                             | $\sigma_{\text{cal}}$ | $\sigma_{\text{ref}}$ | $\delta_{\text{ref}}$ | $\delta_{\text{cal}}$ (RRS) | $\delta_{\text{cal}}$ (TMS) | $\delta_{\text{exp}}$ | AE (RRS) | AE (TMS) |
|-----------------------------------------------|-----------------------|-----------------------|-----------------------|-----------------------------|-----------------------------|-----------------------|----------|----------|
| H2                                            | 23.735                | 23.661                | 7.385                 | 7.311                       | 7.887                       | 8.530                 | 1.219    | 0.643    |
| H3                                            | 24.339                | 23.832                | 7.011                 | 6.504                       | 7.284                       | 7.660                 | 1.156    | 0.376    |
| H4                                            | 24.088                | 23.758                | 6.863                 | 6.533                       | 7.534                       | 7.290                 | 0.757    | 0.244    |
| H1                                            | 28.291                | 27.653                | 3.641                 | 3.003                       | 3.331                       | 4.020                 | 1.017    | 0.689    |
| H5                                            | 27.714                | 27.653                | 3.641                 | 3.580                       | 3.909                       | 3.780                 | 0.200    | 0.128    |
| H6                                            | 29.546                | 27.653                | 3.641                 | 1.748                       | 2.076                       | 1.710                 | 0.038    | 0.366    |
| H7                                            | 30.058                | 27.653                | 3.641                 | 1.236                       | 1.564                       | 1.220                 | 0.016    | 0.344    |
| H8                                            | 30.463                | 27.653                | 3.641                 | 0.831                       | 1.159                       | 0.870                 | 0.039    | 0.289    |
| reference compound: 1-methylimidazole         |                       |                       |                       |                             | RMS, ppm                    |                       | 0.748    | 0.424    |
| level of theory: <b>b3lyp/6-31++g(d,p)-d3</b> |                       |                       |                       |                             | MAE, ppm                    |                       | 0.555    | 0.385    |

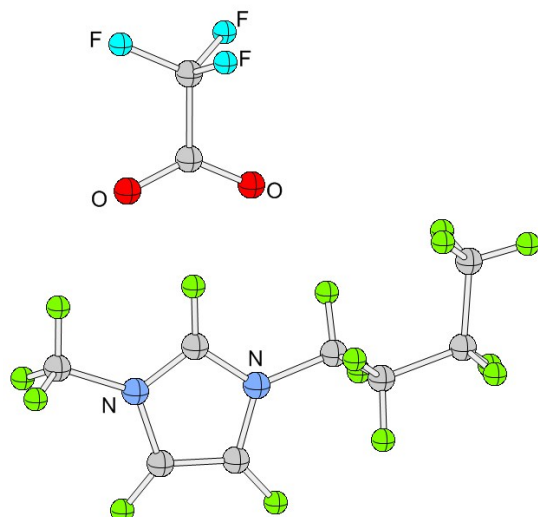

**Figure S12.** Structure of [C<sub>4</sub>mim][TFA]

**Table S13.** Calculated <sup>1</sup>H NMR Chemical Shifts of [C<sub>4</sub>mim][TFA]

| H                                             | $\sigma_{\text{cal}}$ | $\sigma_{\text{ref}}$ | $\delta_{\text{ref}}$ | $\delta_{\text{cal}}$ (RRS) | $\delta_{\text{cal}}$ (TMS) | $\delta_{\text{exp}}$ | AE (RRS) | AE (TMS) |
|-----------------------------------------------|-----------------------|-----------------------|-----------------------|-----------------------------|-----------------------------|-----------------------|----------|----------|
| H2                                            | 19.041                | 23.661                | 7.385                 | 12.005                      | 12.513                      | 8.670                 | 3.335    | 3.843    |
| H3                                            | 24.257                | 23.832                | 7.011                 | 6.586                       | 7.297                       | 7.430                 | 0.844    | 0.133    |
| H4                                            | 24.154                | 23.758                | 6.863                 | 6.467                       | 7.401                       | 7.390                 | 0.923    | 0.011    |
| H1                                            | 27.841                | 27.653                | 3.641                 | 3.453                       | 3.713                       | 4.140                 | 0.687    | 0.427    |
| H5                                            | 27.554                | 27.653                | 3.641                 | 3.740                       | 4.000                       | 3.850                 | 0.110    | 0.150    |
| H6                                            | 29.850                | 27.653                | 3.641                 | 1.444                       | 1.704                       | 1.790                 | 0.346    | 0.086    |
| H7                                            | 30.164                | 27.653                | 3.641                 | 1.130                       | 1.390                       | 1.260                 | 0.130    | 0.130    |
| H8                                            | 30.596                | 27.653                | 3.641                 | 0.698                       | 0.959                       | 0.860                 | 0.162    | 0.099    |
| reference compound: 1-methylimidazole         |                       |                       |                       |                             | RMS, ppm                    |                       | 1.291    | 1.370    |
| level of theory: <b>b3lyp/6-31++g(d,p)-d3</b> |                       |                       |                       |                             | MAE, ppm                    |                       | 0.817    | 0.610    |



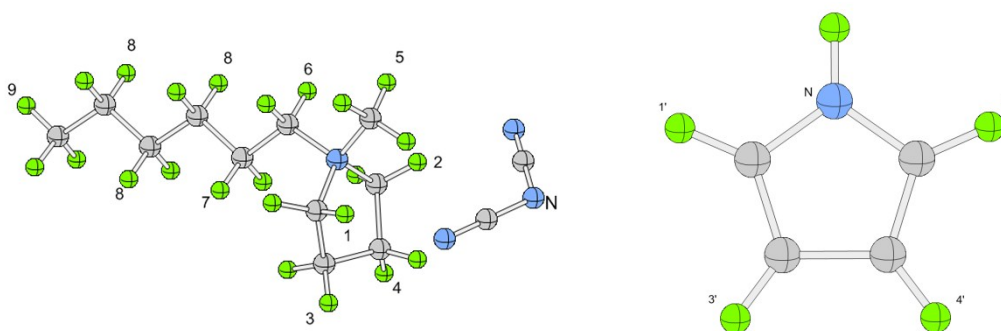

**Figure S13.** Structure of *N*-hexyl-*N*-methylpyrrolidinium dicyanamide ([P16][DCA], left) and pyrrole (right)

**Table S14. Calculated <sup>1</sup>H NMR Chemical Shifts of *N*-hexyl-*N*-methylpyrrolidinium Dicyanamide ([P16][DCA])**

| H                                          | $\sigma_{\text{cal}}$ | $\sigma_{\text{ref}}$ | $\delta_{\text{ref}}$ | $\delta_{\text{cal}}$ (RRS) | $\delta_{\text{cal}}$ (TMS) | $\delta_{\text{exp}}$ | AE (RRS) | AE (TMS) |
|--------------------------------------------|-----------------------|-----------------------|-----------------------|-----------------------------|-----------------------------|-----------------------|----------|----------|
| H1                                         | 27.649                | 23.891                | 6.737                 | 2.979                       | 3.889                       | 3.450                 | 0.471    | 0.439    |
| H2                                         | 27.629                | 23.891                | 6.737                 | 3.000                       | 3.910                       | 3.450                 | 0.450    | 0.460    |
| H3                                         | 29.180                | 24.442                | 6.235                 | 1.497                       | 2.358                       | 2.080                 | 0.583    | 0.278    |
| H4                                         | 29.007                | 24.442                | 6.235                 | 1.670                       | 2.532                       | 2.080                 | 0.410    | 0.452    |
| H5                                         | 28.238                |                       |                       | 3.317                       | 3.301                       | 2.980                 | 0.337    | 0.321    |
| H6                                         | 28.547                |                       |                       | 3.007                       | 2.991                       | 3.290                 | 0.283    | 0.299    |
| H7                                         | 30.007                |                       |                       | 1.547                       | 1.532                       | 1.680                 | 0.133    | 0.148    |
| H8                                         | 30.383                |                       |                       | 1.171                       | 1.155                       | 1.310                 | 0.139    | 0.155    |
| H9                                         | 30.241                |                       |                       | 1.314                       | 1.298                       | 0.880                 | 0.434    | 0.418    |
| reference compound: pyrrole                |                       |                       |                       |                             | RMS, ppm                    |                       | 0.387    | 0.350    |
| level of theory: <b>m06-2x/aug-cc-pvdz</b> |                       |                       |                       |                             | MAE, ppm                    |                       | 0.360    | 0.330    |

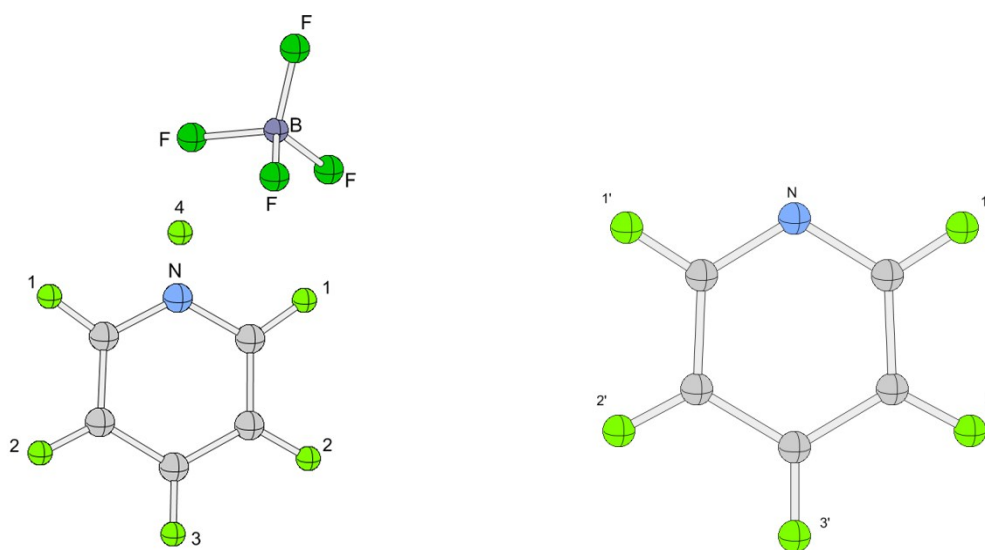

**Figure S14.** Structure of pyridinium tetrafluoroborate ( $[\text{Py}][\text{BF}_4]$ , left) and pyridine (right)

**Table S15.** Calculated  $^1\text{H}$  NMR Chemical Shifts of  $[\text{Py}][\text{BF}_4]$

| H                                  | $\sigma_{\text{cal}}$ | $\sigma_{\text{ref}}$ | $\delta_{\text{ref}}$ | $\delta_{\text{cal}}$ (RRS) | $\delta_{\text{cal}}$ (TMS) | $\delta_{\text{exp}}$ | AE (RRS) | AE (TMS) |
|------------------------------------|-----------------------|-----------------------|-----------------------|-----------------------------|-----------------------------|-----------------------|----------|----------|
| H1                                 | 22.886                | 23.369                | 8.59                  | 9.075                       | 9.771                       | 8.71                  | 0.365    | 1.061    |
| H2                                 | 24.424                | 24.864                | 7.23                  | 7.672                       | 8.233                       | 8.06                  | 0.389    | 0.173    |
| H3                                 | 23.185                | 24.055                | 7.62                  | 8.487                       | 9.472                       | 8.62                  | 0.133    | 0.852    |
| H4                                 | 17.037                |                       |                       | 15.620                      | 15.620                      | 13.09                 | 2.530    | 2.530    |
| reference compound: pyridine       |                       |                       |                       |                             | RMS, ppm                    |                       | 1.295    | 1.439    |
| level of theory: <b>HF/631G(d)</b> |                       |                       |                       |                             | MAE, ppm                    |                       | 0.854    | 1.154    |

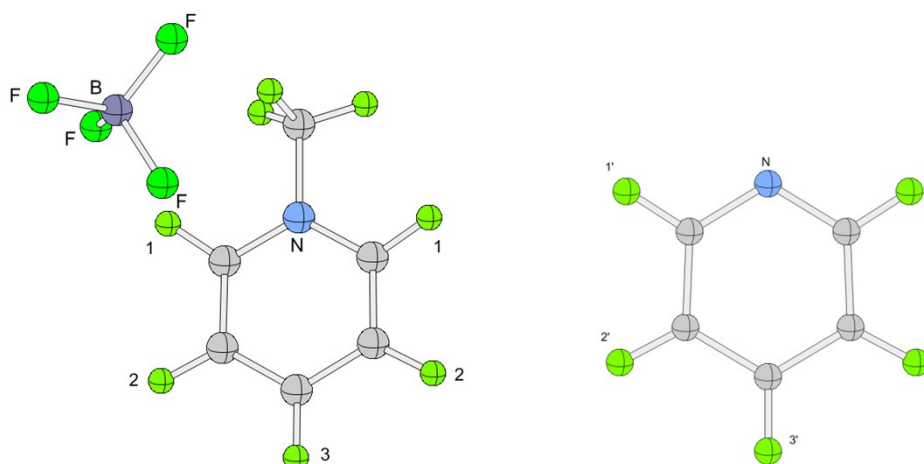

**Figure S15.** Structure of 1-methyl-pyridinium tetrafluoroborate ([1-me-Py][BF<sub>4</sub>], left) and pyridine (right)

**Table S16. Calculated <sup>1</sup>H NMR Chemical Shifts of [1-me-Py][BF<sub>4</sub>]**

| H                                             | $\sigma_{\text{cal}}$ | $\sigma_{\text{ref}}$ | $\delta_{\text{ref}}$ | $\delta_{\text{cal}}$ (RRS) | $\delta_{\text{cal}}$ (TMS) | $\delta_{\text{exp}}$ | AE (RRS) | AE (TMS) |
|-----------------------------------------------|-----------------------|-----------------------|-----------------------|-----------------------------|-----------------------------|-----------------------|----------|----------|
| H1                                            | 23.192                | 22.713                | 8.710                 | 8.231                       | 8.430                       | 8.640                 | 0.409    | 0.210    |
| H2                                            | 23.520                | 23.832                | 8.060                 | 8.372                       | 8.103                       | 8.010                 | 0.362    | 0.093    |
| H3                                            | 23.079                | 23.428                | 8.620                 | 8.969                       | 8.543                       | 8.490                 | 0.479    | 0.053    |
| H4                                            | 27.249                |                       |                       | 4.373                       | 4.373                       | 4.310                 | 0.063    | 0.063    |
| reference compound: pyridine                  |                       |                       |                       |                             | RMS, ppm                    |                       | 0.365    | 0.122    |
| level of theory: <b>b3lyp/6-31++g(d,p)-d3</b> |                       |                       |                       |                             | MAE, ppm                    |                       | 0.328    | 0.105    |

--Calculation data of Tables 2&3

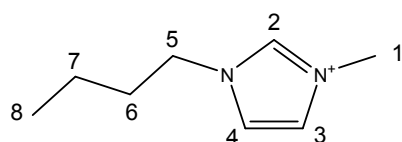

1-butyl-3-methylimidazolium

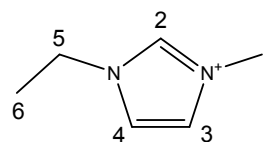

1-ethyl-3-methylimidazolium

**Table S17. Mean Absolute Errors (MAE) and Root Mean Square Deviations (RMS) for the [C<sub>4</sub>mim]<sup>+</sup>-based IL Chemical Shifts Using the Modification of RRS Approach.**

| [C <sub>4</sub> mim][PF <sub>6</sub> ]                     |                       |                       |                       |                             |                             |                       |          |          |
|------------------------------------------------------------|-----------------------|-----------------------|-----------------------|-----------------------------|-----------------------------|-----------------------|----------|----------|
| H                                                          | $\sigma_{\text{cal}}$ | $\sigma_{\text{ref}}$ | $\delta_{\text{ref}}$ | $\delta_{\text{cal}}$ (RRS) | $\delta_{\text{cal}}$ (TMS) | $\delta_{\text{exp}}$ | AE (RRS) | AE (TMS) |
| H2                                                         | 24.192                | 24.209                | 8.820                 | 8.837                       | 8.390                       | 8.520                 | 0.317    | 0.130    |
| H3                                                         | 25.620                | 25.647                | 7.240                 | 7.267                       | 6.963                       | 7.520                 | 0.253    | 0.557    |
| H4                                                         | 25.633                | 25.654                | 7.290                 | 7.311                       | 6.949                       | 7.490                 | 0.179    | 0.541    |
| H1                                                         | 28.659                | 28.678                | 4.260                 | 4.279                       | 3.924                       | 3.970                 | 0.309    | 0.046    |
| H5                                                         | 28.591                | 28.578                | 3.970                 | 3.983                       | 3.991                       | 4.250                 | 0.267    | 0.259    |
| H6                                                         | 30.892                | 30.984                | 1.590                 | 1.683                       | 1.691                       | 1.930                 | 0.247    | 0.239    |
| H7                                                         | 31.701                |                       |                       |                             | 0.882                       | 1.380                 |          | 0.498    |
| H8                                                         | 31.780                |                       |                       |                             | 0.802                       | 0.940                 |          | 0.138    |
| Reference Compound: [C <sub>2</sub> mim][PF <sub>6</sub> ] |                       |                       |                       |                             | RMS, ppm                    |                       | 0.266    | 0.356    |
| level of theory: <b>wp04/6-31+g(d)</b>                     |                       |                       |                       |                             | MAE, ppm                    |                       | 0.262    | 0.301    |
| [C <sub>4</sub> mim][PF <sub>6</sub> ]                     |                       |                       |                       |                             |                             |                       |          |          |
| H                                                          | $\sigma_{\text{cal}}$ | $\sigma_{\text{ref}}$ | $\delta_{\text{ref}}$ | $\delta_{\text{cal}}$ (RRS) | $\delta_{\text{cal}}$ (TMS) | $\delta_{\text{exp}}$ | AE (RRS) | AE (TMS) |
| H2                                                         | 22.569                | 22.848                | 8.820                 | 9.099                       | 9.054                       | 8.520                 | 0.579    | 0.534    |
| H3                                                         | 24.103                | 24.179                | 7.290                 | 7.366                       | 7.519                       | 7.490                 | 0.124    | 0.029    |
| H4                                                         | 24.094                | 24.078                | 7.240                 | 7.224                       | 7.529                       | 7.520                 | 0.296    | 0.009    |
| H1                                                         | 27.606                | 27.650                | 4.260                 | 4.304                       | 4.017                       | 4.250                 | 0.054    | 0.233    |
| H5                                                         | 27.427                | 27.459                | 3.970                 | 4.003                       | 4.196                       | 3.970                 | 0.032    | 0.226    |
| H6                                                         | 29.865                | 30.104                | 1.590                 | 1.829                       | 1.757                       | 1.930                 | 0.101    | 0.173    |
| H7                                                         | 30.489                | 30.104                | 1.590                 | 1.205                       | 1.134                       | 1.380                 | 0.175    | 0.246    |
| H8                                                         | 30.597                | 30.104                | 1.590                 | 1.096                       | 1.025                       | 0.940                 | 0.156    | 0.085    |
| Reference Compound: [C <sub>2</sub> mim][PF <sub>6</sub> ] |                       |                       |                       |                             | RMS, ppm                    |                       | 0.252    | 0.247    |
| level of theory: <b>b3lyp/6-31++g(d,p)-d3</b>              |                       |                       |                       |                             | MAE, ppm                    |                       | 0.190    | 0.192    |
| [C <sub>4</sub> mim][PF <sub>6</sub> ]                     |                       |                       |                       |                             |                             |                       |          |          |
| H                                                          | $\sigma_{\text{cal}}$ | $\sigma_{\text{ref}}$ | $\delta_{\text{ref}}$ | $\delta_{\text{cal}}$ (RRS) | $\delta_{\text{cal}}$ (TMS) | $\delta_{\text{exp}}$ | AE (RRS) | AE (TMS) |
| H2                                                         | 22.952                | 22.010                | 8.820                 | 7.879                       | 8.603                       | 8.520                 | 0.641    | 0.083    |
| H3                                                         | 23.677                | 23.860                | 7.290                 | 7.474                       | 7.878                       | 7.490                 | 0.016    | 0.388    |
| H4                                                         | 23.737                | 23.655                | 7.240                 | 7.158                       | 7.817                       | 7.520                 | 0.362    | 0.297    |
| H1                                                         | 27.432                | 27.665                | 4.260                 | 4.494                       | 4.123                       | 4.250                 | 0.244    | 0.127    |
| H5                                                         | 27.193                | 27.378                | 3.970                 | 4.156                       | 4.362                       | 3.970                 | 0.186    | 0.392    |
| H6                                                         | 29.604                | 29.844                | 1.590                 | 1.830                       | 1.950                       | 1.930                 | 0.100    | 0.020    |
| H7                                                         | 30.634                | 29.844                | 1.590                 | 0.800                       | 0.920                       | 1.380                 | 0.580    | 0.460    |
| H8                                                         | 30.463                | 29.844                | 1.590                 | 0.971                       | 1.091                       | 0.940                 | 0.031    | 0.151    |

| Reference Compound: [C <sub>2</sub> mim][PF <sub>6</sub> ]   |                       |                       |                       |                             |                             | RMS, ppm              | 0.351    | 0.285    |
|--------------------------------------------------------------|-----------------------|-----------------------|-----------------------|-----------------------------|-----------------------------|-----------------------|----------|----------|
| level of theory: <b>m062x/aug-cc-pvdz</b>                    |                       |                       |                       |                             |                             | MAE, ppm              | 0.270    | 0.240    |
| [C <sub>4</sub> mim][MeSO <sub>4</sub> ]                     |                       |                       |                       |                             |                             |                       |          |          |
| H                                                            | $\sigma_{\text{cal}}$ | $\sigma_{\text{ref}}$ | $\delta_{\text{ref}}$ | $\delta_{\text{cal}}$ (RRS) | $\delta_{\text{cal}}$ (TMS) | $\delta_{\text{exp}}$ | AE (RRS) | AE (TMS) |
| H2                                                           | 23.086                | 23.079                | 9.440                 | 9.432                       | 9.496                       | 9.310                 | 0.122    | 0.186    |
| H3                                                           | 25.649                | 25.630                | 7.620                 | 7.640                       | 6.933                       | 8.000                 | 0.360    | 1.067    |
| H4                                                           | 25.672                | 25.636                | 7.620                 | 7.656                       | 6.910                       | 7.920                 | 0.264    | 1.010    |
| H1                                                           | 28.552                | 28.533                | 4.330                 | 4.350                       | 4.030                       | 4.140                 | 0.210    | 0.110    |
| H5                                                           | 28.430                | 28.275                | 4.030                 | 4.185                       | 4.152                       | 4.420                 | 0.235    | 0.268    |
| H6                                                           | 31.145                | 30.335                | 1.280                 | 2.089                       | 1.437                       | 1.950                 | 0.139    | 0.513    |
| H7                                                           | 31.397                |                       |                       |                             | 1.185                       | 1.370                 |          | 0.185    |
| H8                                                           | 31.699                |                       |                       |                             | 0.883                       | 0.930                 |          | 0.047    |
| Reference Compound: [C <sub>2</sub> mim][EtSO <sub>4</sub> ] |                       |                       |                       |                             |                             | RMS, ppm              | 0.236    | 0.567    |
| level of theory: <b>wp04/6-31+g(d)</b>                       |                       |                       |                       |                             |                             | MAE, ppm              | 0.222    | 0.423    |
| [C <sub>4</sub> mim][MeSO <sub>4</sub> ]                     |                       |                       |                       |                             |                             |                       |          |          |
| H                                                            | $\sigma_{\text{cal}}$ | $\sigma_{\text{ref}}$ | $\delta_{\text{ref}}$ | $\delta_{\text{cal}}$ (RRS) | $\delta_{\text{cal}}$ (TMS) | $\delta_{\text{exp}}$ | AE (RRS) | AE (TMS) |
| H2                                                           | 21.587                | 21.298                | 9.440                 | 9.151                       | 10.036                      | 9.418                 | 0.267    | 0.618    |
| H3                                                           | 24.225                | 24.195                | 7.620                 | 7.590                       | 7.397                       | 7.630                 | 0.040    | 0.233    |
| H4                                                           | 24.126                | 24.079                | 7.620                 | 7.573                       | 7.497                       | 7.580                 | 0.007    | 0.084    |
| H1                                                           | 27.753                | 27.670                | 4.330                 | 4.247                       | 3.869                       | 4.260                 | 0.013    | 0.391    |
| H5                                                           | 26.601                | 26.168                | 4.030                 | 3.597                       | 5.455                       | 3.370                 | 0.227    | 2.085    |
| H6                                                           | 29.860                | 30.183                | 1.280                 | 1.603                       | 1.762                       | 1.881                 | 0.278    | 0.119    |
| H7                                                           | 30.094                | 30.183                | 1.280                 | 1.370                       | 1.529                       | 1.352                 | 0.018    | 0.177    |
| H8                                                           | 30.623                | 30.183                | 1.280                 | 0.841                       | 1.000                       | 0.935                 | 0.094    | 0.065    |
| Reference Compound: [C <sub>2</sub> mim][EtSO <sub>4</sub> ] |                       |                       |                       |                             |                             | RMS, ppm              | 0.162    | 0.790    |
| level of theory: <b>b3lyp/6-31++g(d,p)-d3</b>                |                       |                       |                       |                             |                             | MAE, ppm              | 0.118    | 0.471    |
| [C <sub>4</sub> mim][MeSO <sub>4</sub> ]                     |                       |                       |                       |                             |                             |                       |          |          |
| H                                                            | $\sigma_{\text{cal}}$ | $\sigma_{\text{ref}}$ | $\delta_{\text{ref}}$ | $\delta_{\text{cal}}$ (RRS) | $\delta_{\text{cal}}$ (TMS) | $\delta_{\text{exp}}$ | AE (RRS) | AE (TMS) |
| H2                                                           | 20.987                | 20.697                | 9.440                 | 9.149                       | 10.512                      | 9.418                 | 0.269    | 1.094    |
| H3                                                           | 23.831                | 23.740                | 7.620                 | 7.528                       | 7.668                       | 7.630                 | 0.102    | 0.038    |
| H4                                                           | 23.681                | 23.599                | 7.620                 | 7.538                       | 7.818                       | 7.580                 | 0.042    | 0.238    |
| H1                                                           | 27.482                | 27.506                | 4.330                 | 4.354                       | 4.016                       | 4.260                 | 0.094    | 0.244    |
| H5                                                           | 27.232                | 26.823                | 4.030                 | 3.621                       | 4.267                       | 3.370                 | 0.251    | 0.897    |
| H6                                                           | 29.986                | 29.998                | 1.280                 | 1.291                       | 1.512                       | 1.881                 | 0.590    | 0.369    |
| H7                                                           | 30.113                | 29.998                | 1.280                 | 1.164                       | 1.386                       | 1.352                 | 0.188    | 0.034    |
| H8                                                           | 30.410                | 29.998                | 1.280                 | 0.868                       | 1.089                       | 0.935                 | 0.067    | 0.154    |
| Reference Compound: [C <sub>2</sub> mim][EtSO <sub>4</sub> ] |                       |                       |                       |                             |                             | RMS, ppm              | 0.261    | 0.534    |
| level of theory: <b>m062x/aug-cc-pvdz</b>                    |                       |                       |                       |                             |                             | MAE, ppm              | 0.200    | 0.383    |
| [C <sub>4</sub> mim][BF <sub>4</sub> ]                       |                       |                       |                       |                             |                             |                       |          |          |
| H                                                            | $\sigma_{\text{cal}}$ | $\sigma_{\text{ref}}$ | $\delta_{\text{ref}}$ | $\delta_{\text{cal}}$ (RRS) | $\delta_{\text{cal}}$ (TMS) | $\delta_{\text{exp}}$ | AE (RRS) | AE (TMS) |
| H2                                                           | 24.144                | 24.102                | 8.550                 | 8.508                       | 8.438                       | 8.770                 | 0.262    | 0.332    |
| H3                                                           | 26.699                | 25.689                | 7.350                 | 8.359                       | 5.884                       | 7.690                 | 0.669    | 1.806    |
| H4                                                           | 25.697                | 25.681                | 7.410                 | 7.426                       | 6.885                       | 7.630                 | 0.204    | 0.745    |

|                                                            |                       |                       |                       |                             |                             |                       |          |          |
|------------------------------------------------------------|-----------------------|-----------------------|-----------------------|-----------------------------|-----------------------------|-----------------------|----------|----------|
| H1                                                         | 28.402                | 28.680                | 4.140                 | 4.418                       | 4.180                       | 4.040                 | 0.378    | 0.140    |
| H5                                                         | 28.424                | 28.564                | 3.830                 | 3.970                       | 4.158                       | 4.320                 | 0.350    | 0.162    |
| H6                                                         | 30.617                | 30.972                | 1.410                 | 1.765                       | 1.965                       | 1.930                 | 0.165    | 0.035    |
| H7                                                         | 31.123                |                       |                       |                             | 1.459                       | 1.380                 |          | 0.079    |
| H8                                                         | 31.377                |                       |                       |                             | 1.205                       | 0.940                 |          | 0.265    |
| Reference Compound: [C <sub>2</sub> mim][BF <sub>4</sub> ] |                       |                       |                       |                             | RMS, ppm                    |                       | 0.377    | 0.712    |
| level of theory: <b>wp04/6-31+G(d)</b>                     |                       |                       |                       |                             | MAE, ppm                    |                       | 0.338    | 0.446    |
| [C <sub>4</sub> mim][BF <sub>4</sub> ]                     |                       |                       |                       |                             |                             |                       |          |          |
| H                                                          | $\sigma_{\text{cal}}$ | $\sigma_{\text{ref}}$ | $\delta_{\text{ref}}$ | $\delta_{\text{cal}}$ (RRS) | $\delta_{\text{cal}}$ (TMS) | $\delta_{\text{exp}}$ | AE (RRS) | AE (TMS) |
| H2                                                         | 22.058                | 22.050                | 8.550                 | 8.542                       | 9.565                       | 8.770                 | 0.228    | 0.795    |
| H3                                                         | 24.183                | 24.210                | 7.350                 | 7.377                       | 7.440                       | 7.630                 | 0.253    | 0.190    |
| H4                                                         | 24.109                | 24.132                | 7.410                 | 7.434                       | 7.514                       | 7.690                 | 0.256    | 0.176    |
| H1                                                         | 27.728                | 27.727                | 4.140                 | 4.139                       | 3.894                       | 4.040                 | 0.099    | 0.146    |
| H5                                                         | 26.565                | 26.761                | 3.840                 | 4.037                       | 5.058                       | 4.320                 | 0.284    | 0.738    |
| H6                                                         | 29.780                | 30.177                | 1.410                 | 1.806                       | 1.842                       | 1.930                 | 0.124    | 0.088    |
| H7                                                         | 30.123                | 30.177                | 1.410                 | 1.464                       | 1.500                       | 1.380                 | 0.084    | 0.119    |
| H8                                                         | 30.616                | 30.177                | 1.410                 | 0.970                       | 1.006                       | 0.940                 | 0.030    | 0.066    |
| Reference Compound: [C <sub>2</sub> mim][BF <sub>4</sub> ] |                       |                       |                       |                             | RMS, ppm                    |                       | 0.192    | 0.402    |
| level of theory: <b>b3lyp/6-31++g(d,p)-d3</b>              |                       |                       |                       |                             | MAE, ppm                    |                       | 0.170    | 0.290    |
| [C <sub>4</sub> mim][BF <sub>4</sub> ]                     |                       |                       |                       |                             |                             |                       |          |          |
| H                                                          | $\sigma_{\text{cal}}$ | $\sigma_{\text{ref}}$ | $\delta_{\text{ref}}$ | $\delta_{\text{cal}}$ (RRS) | $\delta_{\text{cal}}$ (TMS) | $\delta_{\text{exp}}$ | AE (RRS) | AE (TMS) |
| H2                                                         | 22.525                | 22.864                | 8.550                 | 8.889                       | 9.030                       | 8.770                 | 0.119    | 0.260    |
| H3                                                         | 23.791                | 23.862                | 7.350                 | 7.421                       | 7.764                       | 7.630                 | 0.209    | 0.134    |
| H4                                                         | 23.665                | 23.937                | 7.410                 | 7.682                       | 7.890                       | 7.690                 | 0.008    | 0.200    |
| H1                                                         | 27.715                | 27.520                | 4.140                 | 3.945                       | 3.839                       | 4.040                 | 0.095    | 0.201    |
| H5                                                         | 27.351                | 27.574                | 3.840                 | 4.063                       | 3.981                       | 4.320                 | 0.257    | 0.339    |
| H6                                                         | 29.773                | 27.574                | 3.840                 | 1.641                       | 1.782                       | 1.930                 | 0.289    | 0.148    |
| H7                                                         | 30.019                | 27.574                | 3.840                 | 1.394                       | 1.535                       | 1.380                 | 0.014    | 0.155    |
| H8                                                         | 30.419                | 29.869                | 1.410                 | 0.860                       | 1.136                       | 0.940                 | 0.080    | 0.196    |
| Reference Compound: [C <sub>2</sub> mim][BF <sub>4</sub> ] |                       |                       |                       |                             | RMS, ppm                    |                       | 0.167    | 0.214    |
| level of theory: <b>m062x/aug-cc-pvdz</b>                  |                       |                       |                       |                             | MAE, ppm                    |                       | 0.134    | 0.204    |
| [C <sub>4</sub> mim][OTs]                                  |                       |                       |                       |                             |                             |                       |          |          |
| H                                                          | $\sigma_{\text{cal}}$ | $\sigma_{\text{ref}}$ | $\delta_{\text{ref}}$ | $\delta_{\text{cal}}$ (RRS) | $\delta_{\text{cal}}$ (TMS) | $\delta_{\text{exp}}$ | AE (RRS) | AE (TMS) |
| H2                                                         | 23.735                | 23.662                | 8.590                 | 8.517                       | 7.887                       | 8.530                 | 0.013    | 0.643    |
| H3                                                         | 24.339                | 24.380                | 7.700                 | 7.742                       | 7.284                       | 7.660                 | 0.082    | 0.376    |
| H4                                                         | 24.088                | 24.093                | 7.370                 | 7.375                       | 7.534                       | 7.290                 | 0.085    | 0.244    |
| H1                                                         | 28.291                | 28.358                | 4.160                 | 4.227                       | 3.331                       | 4.020                 | 0.207    | 0.689    |
| H5                                                         | 27.714                | 27.537                | 3.830                 | 3.653                       | 3.909                       | 3.780                 | 0.127    | 0.128    |
| H6                                                         | 29.546                | 29.961                | 1.470                 | 1.885                       | 2.076                       | 1.710                 | 0.175    | 0.366    |
| H7                                                         | 30.058                | 29.961                | 1.470                 | 1.373                       | 1.564                       | 1.220                 | 0.153    | 0.344    |
| H8                                                         | 30.463                | 29.961                | 1.470                 | 0.968                       | 1.159                       | 0.870                 | 0.098    | 0.289    |
| Reference Compound: [C <sub>2</sub> mim][OTs]              |                       |                       |                       |                             | RMS, ppm                    |                       | 0.131    | 0.424    |
| level of theory: <b>b3lyp/6-31++g(d,p)-d3</b>              |                       |                       |                       |                             | MAE, ppm                    |                       | 0.117    | 0.385    |

| [C <sub>4</sub> mim][OAC]                     |                       |                       |                       |                             |                             |                       |          |          |
|-----------------------------------------------|-----------------------|-----------------------|-----------------------|-----------------------------|-----------------------------|-----------------------|----------|----------|
| H                                             | $\sigma_{\text{cal}}$ | $\sigma_{\text{ref}}$ | $\delta_{\text{ref}}$ | $\delta_{\text{cal}}$ (RRS) | $\delta_{\text{cal}}$ (TMS) | $\delta_{\text{exp}}$ | AE (RRS) | AE (TMS) |
| H2                                            | 17.459                | 17.470                | 9.890                 | 9.901                       | 14.164                      | 10.18                 | 0.279    | 3.984    |
| H3                                            | 24.265                | 24.297                | 7.880                 | 7.912                       | 7.358                       | 7.880                 | 0.032    | 0.522    |
| H4                                            | 24.195                | 24.268                | 7.780                 | 7.852                       | 7.427                       | 7.960                 | 0.108    | 0.533    |
| H1                                            | 27.745                | 27.751                | 4.210                 | 4.216                       | 3.878                       | 4.200                 | 0.016    | 0.323    |
| H5                                            | 24.876                | 24.843                | 3.860                 | 3.827                       | 6.747                       | 3.890                 | 0.063    | 2.857    |
| H6                                            | 29.882                | 30.256                | 1.390                 | 1.765                       | 1.741                       | 1.600                 | 0.165    | 0.141    |
| H7                                            | 30.178                | 30.256                | 1.390                 | 1.468                       | 1.444                       | 1.210                 | 0.258    | 0.234    |
| H8                                            | 30.594                | 30.256                | 1.390                 | 1.052                       | 1.028                       | 0.840                 | 0.212    | 0.188    |
| Reference Compound: [C <sub>2</sub> mim][OAC] |                       |                       |                       |                             | RMS, ppm                    |                       | 0.171    | 1.761    |
| level of theory: <b>b3lyp/6-31++g(d,p)-d3</b> |                       |                       |                       |                             | MAE, ppm                    |                       | 0.142    | 1.098    |
| [C <sub>4</sub> mim][OAC]                     |                       |                       |                       |                             |                             |                       |          |          |
| H                                             | $\sigma_{\text{cal}}$ | $\sigma_{\text{ref}}$ | $\delta_{\text{ref}}$ | $\delta_{\text{cal}}$ (RRS) | $\delta_{\text{cal}}$ (TMS) | $\delta_{\text{exp}}$ | AE (RRS) | AE (TMS) |
| H2                                            | 17.735                | 17.798                | 9.890                 | 9.953                       | 13.819                      | 10.18<br>0            | 0.227    | 3.639    |
| H3                                            | 23.816                | 23.786                | 7.880                 | 7.850                       | 7.738                       | 7.880                 | 0.030    | 0.142    |
| H4                                            | 23.709                | 23.746                | 7.780                 | 7.817                       | 7.845                       | 7.960                 | 0.144    | 0.115    |
| H1                                            | 27.298                | 27.306                | 4.210                 | 4.218                       | 4.256                       | 4.200                 | 0.018    | 0.056    |
| H5                                            | 26.954                | 26.918                | 3.860                 | 3.824                       | 4.601                       | 3.890                 | 0.066    | 0.711    |
| H6                                            | 29.882                | 29.995                | 1.390                 | 1.503                       | 1.672                       | 1.600                 | 0.097    | 0.072    |
| H7                                            | 30.178                | 29.995                | 1.390                 | 1.207                       | 1.376                       | 1.210                 | 0.003    | 0.166    |
| H8                                            | 30.422                | 29.995                | 1.390                 | 0.962                       | 1.132                       | 0.840                 | 0.122    | 0.292    |
| Reference Compound: [C <sub>2</sub> mim][OAC] |                       |                       |                       |                             | RMS, ppm                    |                       | 0.113    | 1.318    |
| level of theory: <b>m062x/aug-cc-pvdz</b>     |                       |                       |                       |                             | MAE, ppm                    |                       | 0.088    | 0.649    |
| [C <sub>4</sub> mim][TFA]                     |                       |                       |                       |                             |                             |                       |          |          |
| H                                             | $\sigma_{\text{cal}}$ | $\sigma_{\text{ref}}$ | $\delta_{\text{ref}}$ | $\delta_{\text{cal}}$ (RRS) | $\delta_{\text{cal}}$ (TMS) | $\delta_{\text{exp}}$ | AE (RRS) | AE (TMS) |
| H2                                            | 19.041                | 19.101                | 8.810                 | 8.870                       | 12.513                      | 8.670                 | 0.200    | 3.843    |
| H3                                            | 24.257                | 24.238                | 7.580                 | 7.561                       | 7.297                       | 7.430                 | 0.131    | 0.133    |
| H4                                            | 24.154                | 24.133                | 7.510                 | 7.490                       | 7.401                       | 7.390                 | 0.100    | 0.011    |
| H1                                            | 27.841                | 27.699                | 4.310                 | 4.168                       | 3.713                       | 4.140                 | 0.028    | 0.427    |
| H5                                            | 27.554                | 27.303                | 3.980                 | 3.729                       | 4.000                       | 3.850                 | 0.121    | 0.150    |
| H6                                            | 29.850                | 30.175                | 1.280                 | 1.604                       | 1.704                       | 1.790                 | 0.186    | 0.086    |
| H7                                            | 30.164                | 30.175                | 1.280                 | 1.291                       | 1.390                       | 1.260                 | 0.031    | 0.130    |
| H8                                            | 30.596                | 30.202                | 1.280                 | 0.886                       | 0.959                       | 0.860                 | 0.026    | 0.099    |
| Reference Compound: [C <sub>2</sub> mim][TFA] |                       |                       |                       |                             | RMS, ppm                    |                       | 0.122    | 1.370    |
| level of theory: <b>b3lyp/6-31++g(d,p)-d3</b> |                       |                       |                       |                             | MAE, ppm                    |                       | 0.103    | 0.610    |

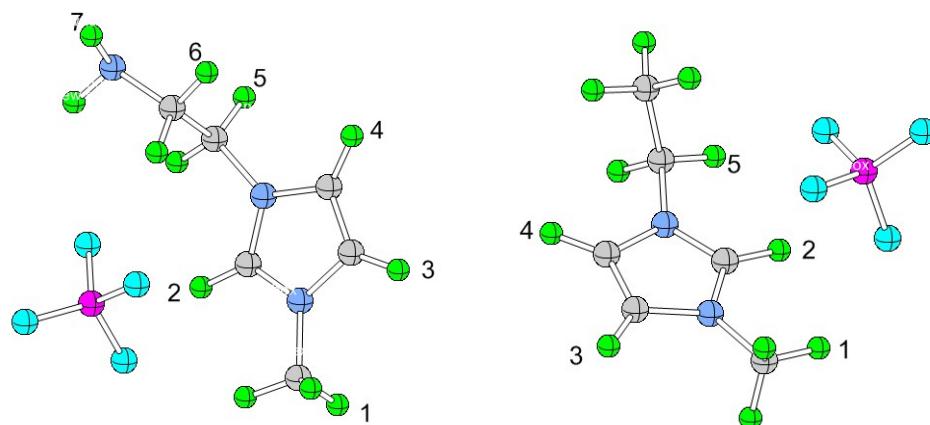

**Figure S16.** Structure of Amine 1-ethyl-3-methylimidazolium tetrafluoroborate ( $[\text{NH}_2\text{-emim}][\text{BF}_4]$ , left) and 1-ethyl-3-methylimidazolium tetrafluoroborate ( $[\text{C}_2\text{mim}][\text{BF}_4]$ , right)

**Table S18. Mean Absolute Errors (MAE) and Root Mean Square Deviations (RMS) of the  $[\text{NH}_2\text{-emim}][\text{BF}_4]$  Chemical Shifts Using the Modification of RRS Approach.**

| $[\text{NH}_2\text{-emim}][\text{BF}_4]$                  |                       |                       |                       |                                   |                                   |                       |          |          |
|-----------------------------------------------------------|-----------------------|-----------------------|-----------------------|-----------------------------------|-----------------------------------|-----------------------|----------|----------|
| H                                                         | $\sigma_{\text{cal}}$ | $\sigma_{\text{ref}}$ | $\delta_{\text{ref}}$ | $\delta_{\text{cal}}(\text{RRS})$ | $\delta_{\text{cal}}(\text{TMS})$ | $\delta_{\text{exp}}$ | AE (RRS) | AE (TMS) |
| H2                                                        | 22.864                | 23.204                | 8.550                 | 8.890                             | 8.759                             | 9.120                 | 0.230    | 0.361    |
| H3                                                        | 23.858                | 23.937                | 7.350                 | 7.429                             | 7.765                             | 7.450                 | 0.021    | 0.315    |
| H4                                                        | 23.844                | 23.862                | 7.410                 | 7.428                             | 7.778                             | 7.200                 | 0.228    | 0.578    |
| H1                                                        | 27.520                | 27.434                | 4.140                 | 4.054                             | 4.102                             | 3.720                 | 0.334    | 0.382    |
| H5                                                        | 27.389                | 29.869                | 1.410                 | 3.890                             | 4.233                             | 3.410                 | 0.480    | 0.823    |
| H6                                                        | 28.570                | 29.869                | 1.410                 | 2.710                             | 3.053                             | 2.770                 | 0.060    | 0.283    |
| H7                                                        | 30.849                | 29.869                | 1.410                 | 0.430                             | 0.773                             | 2.070                 |          |          |
| Reference Compound: $[\text{C}_2\text{mim}][\text{BF}_4]$ |                       |                       |                       |                                   | RMS, ppm                          |                       | 0.274    | 0.495    |
| level of theory: <b>m062x/aug-cc-pvdz</b>                 |                       |                       |                       |                                   | MAE, ppm                          |                       | 0.225    | 0.457    |



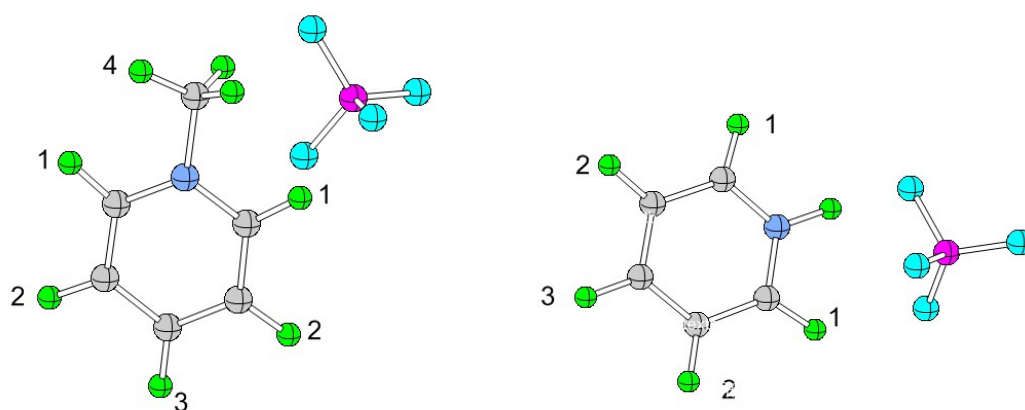

**Figure S17.** Structure of 1-methyl-pyridinium tetrafluoroborate ([1-me-Py][BF<sub>4</sub>], left) and pyridinium tetrafluoroborate ([Py][BF<sub>4</sub>],right)

**Table S19. Mean Absolute Errors (MAE) and Root Mean Square Deviations (RMS) of the [1-me-Py][BF<sub>4</sub>] Chemical Shifts Using the Modification of RRS Approach.**

| [1-me-Py][BF <sub>4</sub> ]                   |                       |                       |                       |                             |                             |                       |          |          |
|-----------------------------------------------|-----------------------|-----------------------|-----------------------|-----------------------------|-----------------------------|-----------------------|----------|----------|
| H                                             | $\sigma_{\text{cal}}$ | $\sigma_{\text{ref}}$ | $\delta_{\text{ref}}$ | $\delta_{\text{cal}}$ (RRS) | $\delta_{\text{cal}}$ (TMS) | $\delta_{\text{exp}}$ | AE (RRS) | AE (TMS) |
| H1                                            | 23.341                | 23.486                | 8.710                 | 8.570                       | 8.871                       | 8.640                 | 0.0743   | 0.231    |
| H2                                            | 24.517                | 24.371                | 8.060                 | 8.210                       | 7.695                       | 8.010                 | 0.196    | 0.315    |
| H3                                            | 23.986                | 23.779                | 8.620                 | 8.410                       | 8.227                       | 8.490                 | 0.0766   | 0.263    |
| H4                                            | 27.796                |                       |                       | 4.420                       | 4.416                       | 4.310                 | 0.106    | 0.106    |
| Reference Compound: [Py][BF <sub>4</sub> ]    |                       |                       |                       |                             | RMS, ppm                    |                       | 0.124    | 0.241    |
| level of theory: <b>wp04/6-31+G(d)</b>        |                       |                       |                       |                             | MAE, ppm                    |                       | 0.113    | 0.229    |
| [1-me-Py][BF <sub>4</sub> ]                   |                       |                       |                       |                             |                             |                       |          |          |
| H                                             | $\sigma_{\text{cal}}$ | $\sigma_{\text{ref}}$ | $\delta_{\text{ref}}$ | $\delta_{\text{cal}}$ (RRS) | $\delta_{\text{cal}}$ (TMS) | $\delta_{\text{exp}}$ | AE (RRS) | AE (TMS) |
| H1                                            | 23.192                | 22.747                | 8.710                 | 8.265                       | 8.430                       | 8.640                 | 0.375    | 0.210    |
| H2                                            | 23.520                | 23.287                | 8.060                 | 7.828                       | 8.103                       | 8.010                 | 0.183    | 0.093    |
| H3                                            | 23.079                | 22.667                | 8.620                 | 8.208                       | 8.543                       | 8.490                 | 0.282    | 0.053    |
| H4                                            | 27.249                |                       |                       | 4.373                       | 4.373                       | 4.310                 | 0.063    | 0.063    |
| Reference Compound: [Py][BF <sub>4</sub> ]    |                       |                       |                       |                             | RMS, ppm                    |                       | 0.254    | 0.122    |
| level of theory: <b>b3lyp/6-31++g(d,p)-d3</b> |                       |                       |                       |                             | MAE, ppm                    |                       | 0.226    | 0.105    |

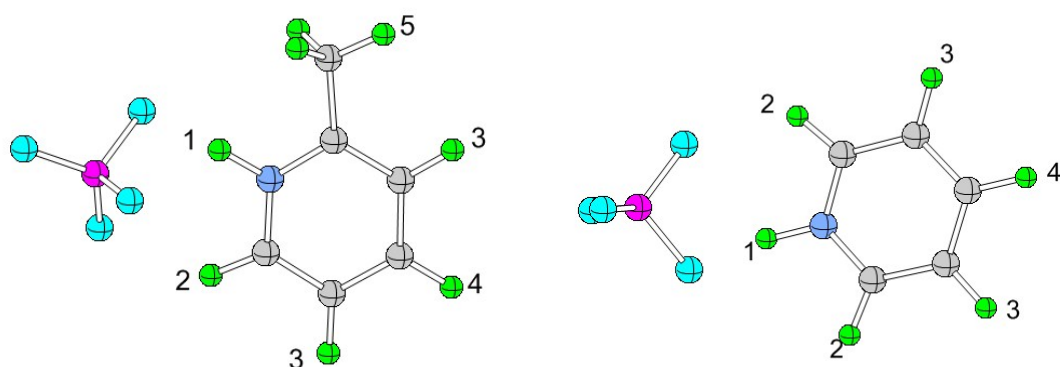

**Figure S18.** Structure of 2-methyl-pyridinium tetrafluoroborate ( $[2\text{-me-Py}][\text{BF}_4]$ , left) and pyridinium tetrafluoroborate ( $[\text{Py}][\text{BF}_4]$ , right)

**Table S20. Mean Absolute Errors (MAE) and Root Mean Square Deviations (RMS) of the  $[2\text{-me-Py}][\text{BF}_4]$  Chemical Shifts Using the Modification of RRS Approach.**

| $[2\text{-me-Py}][\text{BF}_4]$                |                       |                       |                       |                             |                             |                       |          |          |  |
|------------------------------------------------|-----------------------|-----------------------|-----------------------|-----------------------------|-----------------------------|-----------------------|----------|----------|--|
| H                                              | $\sigma_{\text{cal}}$ | $\sigma_{\text{ref}}$ | $\delta_{\text{ref}}$ | $\delta_{\text{cal}}$ (RRS) | $\delta_{\text{cal}}$ (TMS) | $\delta_{\text{exp}}$ | AE (RRS) | AE (TMS) |  |
| H1                                             | 18.209                | 17.755                | 13.09                 | 12.64                       | 14.003                      | 12.42                 | 0.2156   | 1.583    |  |
| H2                                             | 23.332                | 23.486                | 8.710                 | 8.560                       | 8.881                       | 8.540                 | 0.016    | 0.341    |  |
| H3                                             | 24.588                | 24.371                | 8.060                 | 7.840                       | 7.625                       | 7.850                 | 0.0066   | 0.225    |  |
| H4                                             | 23.997                | 23.779                | 8.620                 | 8.400                       | 8.216                       | 8.450                 | 0.048    | 0.234    |  |
| H5                                             | 29.541                |                       |                       | 2.670                       | 2.671                       | 2.750                 | 0.0788   | 0.0788   |  |
| Reference Compound: $[\text{Py}][\text{BF}_4]$ |                       |                       |                       |                             | RMS, ppm                    |                       | 0.105    | 0.740    |  |
| level of theory: <b>wp04/6-31+G(d)</b>         |                       |                       |                       |                             | MAE, ppm                    |                       | 0.0729   | 0.493    |  |
| $[2\text{-me-Py}][\text{BF}_4]$                |                       |                       |                       |                             |                             |                       |          |          |  |
| H                                              | $\sigma_{\text{cal}}$ | $\sigma_{\text{ref}}$ | $\delta_{\text{ref}}$ | $\delta_{\text{cal}}$ (RRS) | $\delta_{\text{cal}}$ (TMS) | $\delta_{\text{exp}}$ | AE (RRS) | AE (TMS) |  |
| H1                                             | 22.621                | 22.747                | 8.710                 | 8.584                       | 9.001                       | 8.540                 | 0.044    | 0.461    |  |
| H2                                             | 23.633                | 23.287                | 8.060                 | 7.715                       | 7.990                       | 7.850                 | 0.135    | 0.140    |  |
| H3                                             | 23.067                | 22.667                | 8.620                 | 8.220                       | 8.555                       | 8.450                 | 0.230    | 0.105    |  |
| H4                                             | 18.110                | 17.495                | 13.090                | 12.48                       | 13.513                      | 12.42                 | 0.056    | 1.093    |  |
| H5                                             | 28.821                |                       |                       | 2.801                       | 2.801                       | 2.750                 | 0.051    | 0.051    |  |
| Reference Compound: $[\text{Py}][\text{BF}_4]$ |                       |                       |                       |                             | RMS, ppm                    |                       | 0.126    | 0.537    |  |
| level of theory: <b>b3lyp/6-31++g(d,p)-d3</b>  |                       |                       |                       |                             | MAE, ppm                    |                       | 0.103    | 0.370    |  |

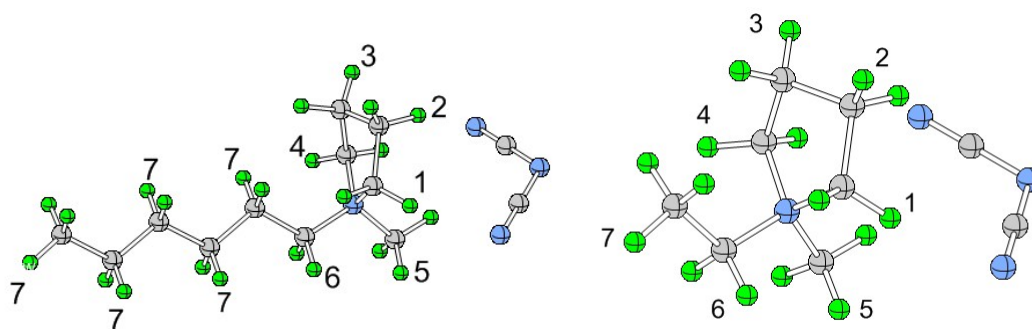

**Figure S19.** Structure of N-butyl-N-methylpyrrolidinium dicyanamide (P16-DCA, left) and N-Ethyl-N-methylpyrrolidinium dicyanamide (P12-DCA, right)

**Table S21. Mean Absolute Errors (MAE) and Root Mean Square Deviations (RMS) of the P16-DCA Chemical Shifts Using the Modification of RRS Approach.**

| P16-DCA                                       |                       |                       |                       |                             |                             |                       |          |          |  |
|-----------------------------------------------|-----------------------|-----------------------|-----------------------|-----------------------------|-----------------------------|-----------------------|----------|----------|--|
| H                                             | $\sigma_{\text{cal}}$ | $\sigma_{\text{ref}}$ | $\delta_{\text{ref}}$ | $\delta_{\text{cal}}$ (RRS) | $\delta_{\text{cal}}$ (TMS) | $\delta_{\text{exp}}$ | AE (RRS) | AE (TMS) |  |
| H1                                            | 27.949                | 27.897                | 3.420                 | 3.368                       | 3.605                       | 3.450                 | 0.082    | 0.155    |  |
| H2                                            | 27.746                | 28.039                | 3.420                 | 3.714                       | 3.809                       | 3.450                 | 0.264    | 0.359    |  |
| H3                                            | 29.585                | 29.579                | 2.070                 | 2.065                       | 1.970                       | 2.080                 | 0.016    | 0.111    |  |
| H4                                            | 29.278                | 29.240                | 2.070                 | 2.032                       | 2.276                       | 2.080                 | 0.048    | 0.196    |  |
| H5                                            | 28.541                | 28.463                | 2.950                 | 2.873                       | 3.014                       | 2.980                 | 0.107    | 0.034    |  |
| H6                                            | 28.609                | 28.482                | 3.360                 | 3.234                       | 2.946                       | 3.290                 | 0.056    | 0.344    |  |
| H7                                            | 29.910                | 30.284                | 1.270                 | 1.644                       | 1.644                       | 1.680                 | 0.036    | 0.036    |  |
| Reference Compound: P12-DCA                   |                       |                       |                       |                             | RMS, ppm                    |                       | 0.107    | 0.192    |  |
| level of theory: <b>b3lyp/6-31++g(d,p)-d3</b> |                       |                       |                       |                             | MAE, ppm                    |                       | 0.081    | 0.151    |  |

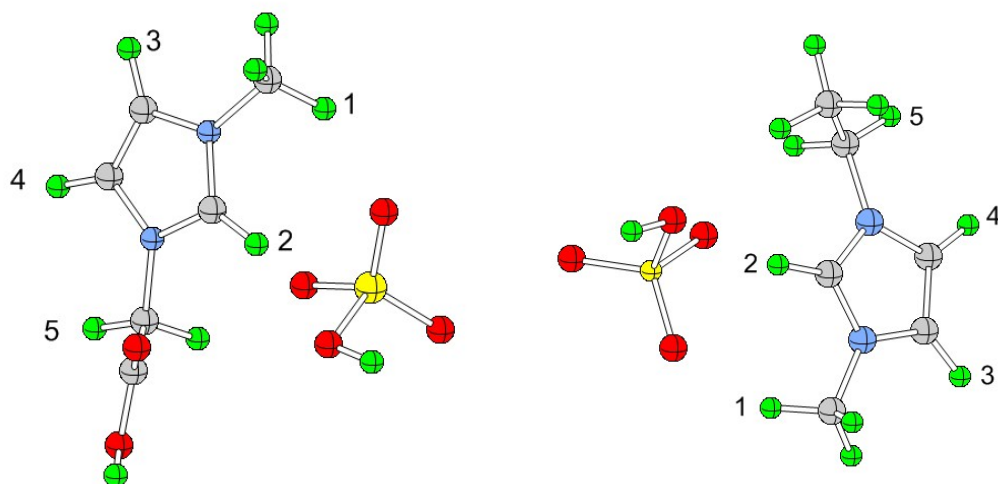

**Figure S20.** Structure of 1-Carboxymethyl-3-methylimidazol-3-ium Hydrogen Sulfate ([CMI][HSO<sub>4</sub>], left) and 1-Ethyl-3-methylimidazolium Hydrogen Sulfate ([EMIM][HSO<sub>4</sub>],right)

**Table S22. Mean Absolute Errors (MAE) and Root Mean Square Deviations (RMS) of the [CMI][HSO<sub>4</sub>] Chemical Shifts Using the Modification of RRS Approach.**

| [CMI][HSO <sub>4</sub> ]                      |                       |                       |                       |                             |                             |                       |          |          |
|-----------------------------------------------|-----------------------|-----------------------|-----------------------|-----------------------------|-----------------------------|-----------------------|----------|----------|
| H                                             | $\sigma_{\text{cal}}$ | $\sigma_{\text{ref}}$ | $\delta_{\text{ref}}$ | $\delta_{\text{cal}}$ (RRS) | $\delta_{\text{cal}}$ (TMS) | $\delta_{\text{exp}}$ | AE (RRS) | AE (TMS) |
| H1                                            | 23.3413               | 23.4856               | 8.71                  | 8.57                        | 8.8711                      | 8.64                  | 0.0743   | 0.2311   |
| H2                                            | 24.5172               | 24.3711               | 8.06                  | 8.21                        | 7.6952                      | 8.01                  | 0.1962   | 0.3148   |
| H3                                            | 23.9858               | 23.7792               | 8.62                  | 8.41                        | 8.2266                      | 8.49                  | 0.0766   | 0.2634   |
| H4                                            | 27.7964               |                       |                       | 4.42                        | 4.4160                      | 4.31                  | 0.1060   | 0.1060   |
| Reference Compound:[EMIM][HSO <sub>4</sub> ]  |                       |                       |                       |                             | RMS, ppm                    |                       | 0.1236   | 0.2414   |
| level of theory:B3LYP/6-31+G(d)               |                       |                       |                       |                             | MAE, ppm                    |                       | 0.1133   | 0.2288   |
| [CMI][HSO <sub>4</sub> ]                      |                       |                       |                       |                             |                             |                       |          |          |
| H                                             | $\sigma_{\text{cal}}$ | $\sigma_{\text{ref}}$ | $\delta_{\text{ref}}$ | $\delta_{\text{cal}}$ (RRS) | $\delta_{\text{cal}}$ (TMS) | $\delta_{\text{exp}}$ | AE (RRS) | AE (TMS) |
| H1                                            | 22.285                | 23.327                | 8.310                 | 9.352                       | 9.253                       | 8.680                 | 0.672    | 0.573    |
| H2                                            | 23.605                | 24.049                | 7.110                 | 7.554                       | 7.933                       | 7.390                 | 0.164    | 0.543    |
| H3                                            | 23.497                | 23.971                | 7.050                 | 7.524                       | 8.041                       | 7.370                 | 0.154    | 0.671    |
| H4                                            | 27.533                | 27.732                | 3.860                 | 4.060                       | 4.005                       | 3.820                 | 0.240    | 0.185    |
| H5                                            | 26.170                | 27.396                | 3.520                 | 4.746                       | 5.368                       | 4.990                 | 0.244    | 0.378    |
| Reference Compound:[EMIM][HSO <sub>4</sub> ]  |                       |                       |                       |                             | RMS, ppm                    |                       | 0.352    | 0.500    |
| level of theory: <b>b3lyp/6-31++g(d,p)-d3</b> |                       |                       |                       |                             | MAE, ppm                    |                       | 0.295    | 0.470    |
| [CMI][HSO <sub>4</sub> ]                      |                       |                       |                       |                             |                             |                       |          |          |
| H                                             | $\sigma_{\text{cal}}$ | $\sigma_{\text{ref}}$ | $\delta_{\text{ref}}$ | $\delta_{\text{cal}}$ (RRS) | $\delta_{\text{cal}}$ (TMS) | $\delta_{\text{exp}}$ | AE (RRS) | AE (TMS) |
| H1                                            | 22.032                | 22.864                | 8.310                 | 9.141                       | 9.506                       | 8.680                 | 0.461    | 0.826    |
| H2                                            | 23.483                | 23.611                | 7.110                 | 7.238                       | 8.055                       | 7.390                 | 0.152    | 0.665    |
| H3                                            | 23.554                | 23.592                | 7.050                 | 7.088                       | 7.984                       | 7.370                 | 0.282    | 0.614    |
| H4                                            | 27.442                | 27.494                | 3.860                 | 3.912                       | 4.096                       | 3.820                 | 0.092    | 0.276    |

|                     |                           |        |       |       |          |       |       |       |
|---------------------|---------------------------|--------|-------|-------|----------|-------|-------|-------|
| H5                  | 26.233                    | 27.364 | 3.520 | 4.651 | 5.305    | 4.990 | 0.339 | 0.315 |
| Reference Compound: | [EMIM][HSO <sub>4</sub> ] |        |       |       | RMS, ppm |       | 0.296 | 0.579 |
| level of theory:    | m062x/aug-cc-pvdz         |        |       |       | MAE, ppm |       | 0.265 | 0.539 |

**Table S23. Calculated <sup>1</sup>H NMR Chemical Shifts of the [C<sub>4</sub>mim]<sup>+</sup>-Based ILs**

| entry | Studied IL                               | Refence IL                               | Level of theory   |          | MAE    | RMS    |
|-------|------------------------------------------|------------------------------------------|-------------------|----------|--------|--------|
| 1     | [C <sub>4</sub> mim][BF <sub>4</sub> ]   | [C <sub>2</sub> mim][BF <sub>4</sub> ]   | b3lyp/6-31gd+     | RRS, ppm | 0.2480 | 0.2198 |
|       |                                          |                                          |                   | TMS, ppm |        |        |
| 2     | [C <sub>4</sub> mim][BF <sub>4</sub> ]   | [C <sub>2</sub> mim][BF <sub>4</sub> ]   | b3lyp/6-311gdp++  | RRS, ppm | 0.2084 | 0.1864 |
|       |                                          |                                          |                   | TMS, ppm |        |        |
| 3     | [C <sub>4</sub> mim][BF <sub>4</sub> ]   | [C <sub>2</sub> mim][BF <sub>4</sub> ]   | b3lyp/aug-cc-pvdz | RRS, ppm | 0.2108 | 0.1909 |
|       |                                          |                                          |                   | TMS, ppm |        |        |
| 4     | [C <sub>4</sub> mim][BF <sub>4</sub> ]   | [C <sub>2</sub> mim][BF <sub>4</sub> ]   | m062x/6-31gd+     | RRS, ppm | 0.2726 | 0.2147 |
|       |                                          |                                          |                   | TMS, ppm |        |        |
| 5     | [C <sub>4</sub> mim][BF <sub>4</sub> ]   | [C <sub>2</sub> mim][BF <sub>4</sub> ]   | mpw1pw91/6-31gd+  | RRS, ppm | 0.2480 | 0.2198 |
|       |                                          |                                          |                   | TMS, ppm |        |        |
| 6     | [C <sub>4</sub> mim][PF <sub>6</sub> ]   | [C <sub>2</sub> mim][PF <sub>6</sub> ]   | b3lyp/6-31gd+     | RRS, ppm | 0.2471 | 0.2288 |
|       |                                          |                                          |                   | TMS, ppm |        |        |
| 7     | [C <sub>4</sub> mim][PF <sub>6</sub> ]   | [C <sub>2</sub> mim][PF <sub>6</sub> ]   | b3lyp/6-311gdp++  | RRS, ppm | 0.2216 | 0.1963 |
|       |                                          |                                          |                   | TMS, ppm |        |        |
| 8     | [C <sub>4</sub> mim][PF <sub>6</sub> ]   | [C <sub>2</sub> mim][PF <sub>6</sub> ]   | b3lyp/aug-cc-pvdz | RRS, ppm | 0.2358 | 0.2151 |
|       |                                          |                                          |                   | TMS, ppm |        |        |
| 9     | [C <sub>4</sub> mim][PF <sub>6</sub> ]   | [C <sub>2</sub> mim][PF <sub>6</sub> ]   | m062x/6-31gd+     | RRS, ppm | 0.2001 | 0.1765 |
|       |                                          |                                          |                   | TMS, ppm |        |        |
| 10    | [C <sub>4</sub> mim][PF <sub>6</sub> ]   | [C <sub>2</sub> mim][PF <sub>6</sub> ]   | mpw1pw91/6-31gd+  | RRS, ppm | 0.2481 | 0.2299 |
|       |                                          |                                          |                   | TMS, ppm |        |        |
| 11    | [C <sub>4</sub> mim][MeSO <sub>4</sub> ] | [C <sub>2</sub> mim][MeSO <sub>4</sub> ] | b3lyp/6-31gd+     | RRS, ppm | 0.2678 | 0.2563 |
|       |                                          |                                          |                   | TMS, ppm |        |        |
| 12    | [C <sub>4</sub> mim][MeSO <sub>4</sub> ] | [C <sub>2</sub> mim][MeSO <sub>4</sub> ] | b3lyp/6-311gdp++  | RRS, ppm | 0.2423 | 0.2164 |
|       |                                          |                                          |                   | TMS, ppm |        |        |
| 13    | [C <sub>4</sub> mim][MeSO <sub>4</sub> ] | [C <sub>2</sub> mim][MeSO <sub>4</sub> ] | b3lyp/aug-cc-pvdz | RRS, ppm | 0.2671 | 0.2457 |
|       |                                          |                                          |                   | TMS, ppm |        |        |
| 14    | [C <sub>4</sub> mim][MeSO <sub>4</sub> ] | [C <sub>2</sub> mim][MeSO <sub>4</sub> ] | m062x/6-31gd+     | RRS, ppm | 0.2319 | 0.2226 |
|       |                                          |                                          |                   | TMS, ppm |        |        |
| 15    | [C <sub>4</sub> mim][MeSO <sub>4</sub> ] | [C <sub>2</sub> mim][MeSO <sub>4</sub> ] | mpw1pw91/6-31gd+  | RRS, ppm | 0.2406 | 0.2316 |
|       |                                          |                                          |                   | TMS, ppm |        |        |
| 16    | [C <sub>4</sub> mim][Tf <sub>2</sub> N]  | [C <sub>2</sub> mim][Tf <sub>2</sub> N]  | b3lyp/6-31gd+     | RRS, ppm | 0.3196 | 0.3013 |
|       |                                          |                                          |                   | TMS, ppm |        |        |
| 17    | [C <sub>4</sub> mim][Tf <sub>2</sub> N]  | [C <sub>2</sub> mim][Tf <sub>2</sub> N]  | b3lyp/6-311gdp++  | RRS, ppm | 0.3200 | 0.3092 |
|       |                                          |                                          |                   | TMS, ppm |        |        |
| 18    | [C <sub>4</sub> mim][Tf <sub>2</sub> N]  | [C <sub>2</sub> mim][Tf <sub>2</sub> N]  | b3lyp/aug-cc-pvdz | RRS, ppm | 0.3300 | 0.3212 |
|       |                                          |                                          |                   | TMS, ppm |        |        |
| 19    | [C <sub>4</sub> mim][Tf <sub>2</sub> N]  | [C <sub>2</sub> mim][Tf <sub>2</sub> N]  | m062x/6-31gd+     | RRS, ppm | 0.3645 | 0.3432 |

|    |                                         |                                         |                   |          |        |        |
|----|-----------------------------------------|-----------------------------------------|-------------------|----------|--------|--------|
|    |                                         |                                         |                   | TMS, ppm | 0.7989 | 0.3733 |
| 20 | [C <sub>4</sub> mim][Tf <sub>2</sub> N] | [C <sub>2</sub> mim][Tf <sub>2</sub> N] | mpw1pw91/6-31gd+  | RRS, ppm | 0.3230 | 0.3049 |
|    |                                         |                                         |                   | TMS, ppm | 0.6865 | 0.4172 |
| 21 | [C <sub>4</sub> mim][OTs]               | [C <sub>2</sub> mim][OTs]               | b3lyp/6-31gd+     | RRS, ppm | 0.2335 | 0.2128 |
|    |                                         |                                         |                   | TMS, ppm | 0.8559 | 0.5345 |
| 22 | [C <sub>4</sub> mim][OTs]               | [C <sub>2</sub> mim][OTs]               | b3lyp/6-311gdp++  | RRS, ppm | 0.2328 | 0.2161 |
|    |                                         |                                         |                   | TMS, ppm | 1.1166 | 0.6415 |
| 23 | [C <sub>4</sub> mim][OTs]               | [C <sub>2</sub> mim][OTs]               | b3lyp/aug-cc-pvdz | RRS, ppm | 0.2617 | 0.2211 |
|    |                                         |                                         |                   | TMS, ppm | 1.2185 | 0.6725 |
| 24 | [C <sub>4</sub> mim][OTs]               | [C <sub>2</sub> mim][OTs]               | m062x/6-31gd+     | RRS, ppm | 0.2290 | 0.2103 |
|    |                                         |                                         |                   | TMS, ppm | 1.0051 | 0.5948 |
| 25 | [C <sub>4</sub> mim][OTs]               | [C <sub>2</sub> mim][OTs]               | mpw1pw91/6-31gd+  | RRS, ppm | 0.2260 | 0.2062 |
|    |                                         |                                         |                   | TMS, ppm | 0.8633 | 0.5267 |
| 26 | [C <sub>4</sub> mim][TFA]               | [C <sub>2</sub> mim][TFA]               | b3lyp/6-31gd+     | RRS, ppm | 0.3871 | 0.3565 |
|    |                                         |                                         |                   | TMS, ppm | 1.4080 | 0.6910 |
| 27 | [C <sub>4</sub> mim][TFA]               | [C <sub>2</sub> mim][TFA]               | b3lyp/6-311gdp++  | RRS, ppm | 0.3563 | 0.3246 |
|    |                                         |                                         |                   | TMS, ppm | 1.8407 | 0.8342 |
| 28 | [C <sub>4</sub> mim][TFA]               | [C <sub>2</sub> mim][TFA]               | b3lyp/aug-cc-pvdz | RRS, ppm | 0.3953 | 0.3101 |
|    |                                         |                                         |                   | TMS, ppm | 1.9288 | 0.8555 |
| 29 | [C <sub>4</sub> mim][TFA]               | [C <sub>2</sub> mim][TFA]               | m062x/6-31gd+     | RRS, ppm | 0.3940 | 0.3321 |
|    |                                         |                                         |                   | TMS, ppm | 1.6299 | 0.8290 |
| 30 | [C <sub>4</sub> mim][TFA]               | [C <sub>2</sub> mim][TFA]               | mpw1pw91/6-31gd+  | RRS, ppm | 0.3772 | 0.3467 |
|    |                                         |                                         |                   | TMS, ppm | 1.4139 | 0.6546 |
| 31 | [C <sub>4</sub> mim][OAC]               | [C <sub>2</sub> mim][OAC]               | b3lyp/6-31gd+     | RRS, ppm | 0.4017 | 0.3243 |
|    |                                         |                                         |                   | TMS, ppm | 1.5720 | 0.9384 |
| 32 | [C <sub>4</sub> mim][OAC]               | [C <sub>2</sub> mim][OAC]               | b3lyp/6-311gdp++  | RRS, ppm | 0.4834 | 0.3431 |
|    |                                         |                                         |                   | TMS, ppm | 2.0822 | 1.0864 |
| 33 | [C <sub>4</sub> mim][OAC]               | [C <sub>2</sub> mim][OAC]               | b3lyp/aug-cc-pvdz | RRS, ppm | 0.4619 | 0.3149 |
|    |                                         |                                         |                   | TMS, ppm | 2.1653 | 1.1157 |
| 34 | [C <sub>4</sub> mim][OAC]               | [C <sub>2</sub> mim][OAC]               | m062x/6-31gd+     | RRS, ppm | 0.4412 | 0.3697 |
|    |                                         |                                         |                   | TMS, ppm | 1.7177 | 0.9193 |
| 35 | [C <sub>4</sub> mim][OAC]               | [C <sub>2</sub> mim][OAC]               | mpw1pw91/6-31gd+  | RRS, ppm | 0.4206 | 0.3353 |
|    |                                         |                                         |                   | TMS, ppm | 1.5497 | 0.8931 |

--Calculation of IL clusters

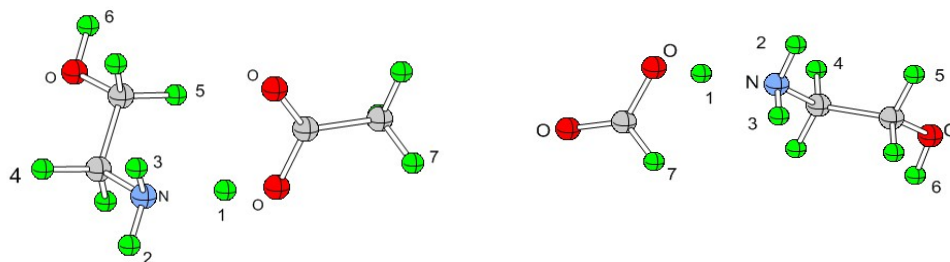

**Figure S21.** Structure of Ethanolamine Acetate (left) and Ethanolamine Formate (right)

**Table S24. Mean Absolute Errors (MAE) and Root Mean Square Deviations (RMS) of the Ethanolamine Acetate Chemical Shifts Using the Modification of RRS Approach.**

ethanolamine acetate

| H                                         | $\sigma_{\text{cal}}$ | $\sigma_{\text{ref}}$ | $\delta_{\text{ref}}$ | $\delta_{\text{cal}}$ (RRS) | $\delta_{\text{cal}}$ (TMS) | $\delta_{\text{exp}}$ | AE (RRS) | AE (TMS) |
|-------------------------------------------|-----------------------|-----------------------|-----------------------|-----------------------------|-----------------------------|-----------------------|----------|----------|
| H1                                        | 13.357                | 14.593                | 5.600                 | 6.836                       | 18.197                      | 6.720                 | 0.116    | 11.477   |
| H2                                        | 29.573                | 29.804                | 6.150                 | 6.381                       | 1.982                       | 6.550                 | 0.169    | 4.568    |
| H3                                        | 29.714                | 30.143                | 5.950                 | 6.379                       | 1.840                       | 6.550                 | 0.171    | 4.710    |
| H4                                        | 28.927                | 28.642                | 3.160                 | 2.874                       | 2.627                       | 2.800                 | 0.074    | 0.173    |
| H5                                        | 27.791                | 27.893                | 3.430                 | 3.532                       | 3.763                       | 3.560                 | 0.028    | 0.203    |
| H6                                        | 30.820                | 30.983                | 7.600                 | 7.763                       | 0.734                       | 7.800                 | 0.037    | 7.066    |
| H7                                        | 29.521                | 22.692                | 8.400                 | 1.572                       | 2.033                       | 1.750                 | 0.179    | 0.283    |
| Reference Compound: ethanolamine formate  |                       |                       |                       |                             | RMS, ppm                    |                       | 0.126    | 5.668    |
| level of theory: <b>m062x/aug-cc-pvdz</b> |                       |                       |                       |                             | MAE, ppm                    |                       | 0.111    | 4.069    |

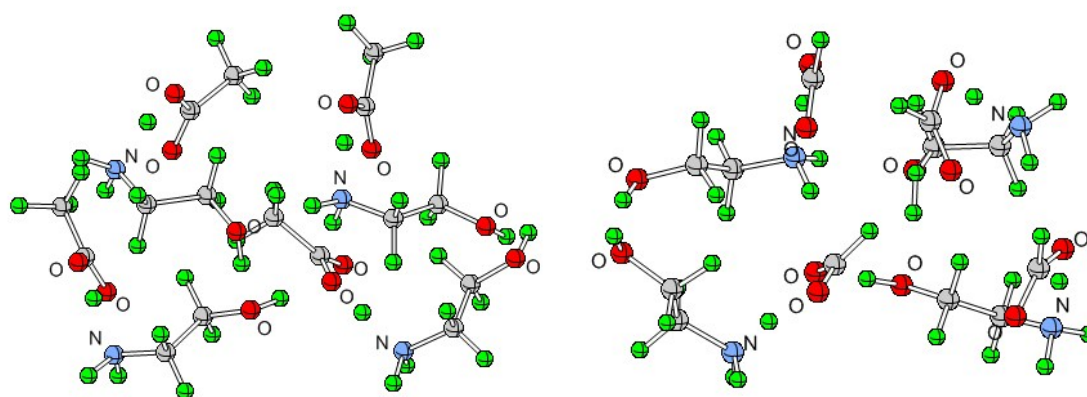

**Figure S22.** Structure of 4 IP Ethanolamine Acetate (left) and 4 IP Ethanolamine Formate (right)

**Table S25. Mean Value of the 4 IP Ethanolamine Acetate Chemical Shifts**

4IP ethanolamine acetate

| H1      | AVERAGE | H2      | AVERAGE | H3      | AVERAGE |
|---------|---------|---------|---------|---------|---------|
| 14.1689 | 13.0831 | 28.9835 | 28.8571 | 28.5098 | 29.3141 |
| 13.8030 |         | 29.0025 |         | 29.9486 |         |
| 13.3752 |         | 28.1450 |         | 29.2008 |         |
| 10.9854 |         | 29.2974 |         | 29.5970 |         |

level of theory: **m062x/aug-cc-pvdz****Table S26. Mean Absolute Errors (MAE) and Root Mean Square Deviations (RMS) of the 4 IP Ethanolamine Acetate Chemical Shifts Using the Modification of RRS Approach.**

4IP ethanolamine acetate

| H                                             | $\sigma_{\text{cal}}$ | $\sigma_{\text{ref}}$ | $\delta_{\text{ref}}$ | $\delta_{\text{cal}}$ (RRS) | $\delta_{\text{cal}}$ (TMS) | $\delta_{\text{exp}}$ | AE (RRS) | AE (TMS) |
|-----------------------------------------------|-----------------------|-----------------------|-----------------------|-----------------------------|-----------------------------|-----------------------|----------|----------|
| H1                                            | 13.083                | 13.125                | 5.600                 | 5.642                       | 18.581                      | 6.720                 | 1.078    | 11.861   |
| H2                                            | 28.857                | 28.426                | 6.150                 | 5.719                       | 2.807                       | 6.550                 | 0.831    | 3.743    |
| H3                                            | 29.314                | 28.385                | 5.950                 | 4.939                       | 2.269                       | 6.550                 | 1.611    | 4.281    |
| H4                                            | 28.732                | 28.498                | 3.160                 | 2.926                       | 2.932                       | 2.800                 | 0.126    | 0.132    |
| H5                                            | 28.127                | 27.195                | 3.430                 | 2.498                       | 3.537                       | 3.560                 | 1.062    | 0.023    |
| H6                                            | 27.716                | 27.097                | 7.600                 | 6.981                       | 3.948                       | 7.800                 | 0.819    | 3.852    |
| H7                                            | 29.605                | 22.865                | 8.400                 | 1.660                       | 2.059                       | 1.750                 | 0.090    | 0.309    |
| Reference Compound: 4 IP ethanolamine formate |                       |                       |                       |                             | RMS, ppm                    |                       | 0.947    | 5.182    |
| level of theory: <b>m062x/aug-cc-pvdz</b>     |                       |                       |                       |                             | MAE, ppm                    |                       | 0.921    | 3.457    |

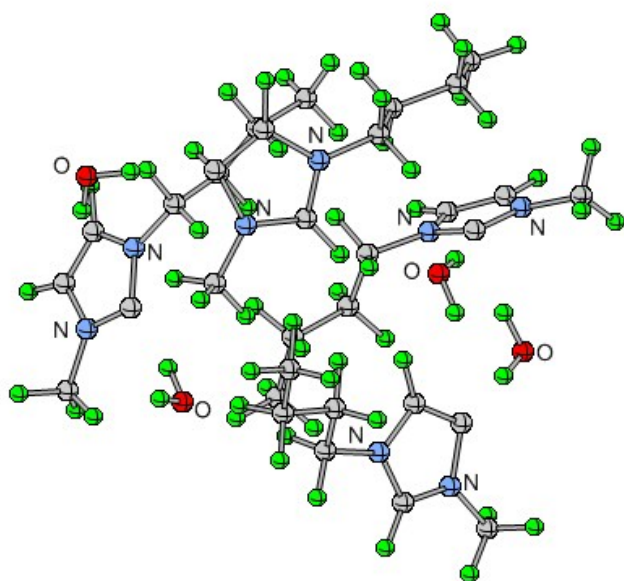**Figure S23. Structure of 4 IP [C<sub>4</sub>mim][OH]**



**Table S27. Mean Value of the 4 IP [C<sub>4</sub>mim][OH] Chemical Shifts**

| 4 IP [C <sub>4</sub> mim][OH] |         |         |         |         |         |
|-------------------------------|---------|---------|---------|---------|---------|
| H2                            | AVERAGE | H3      | AVERAGE | H4      | AVERAGE |
| 21.0759                       | 23.8225 | 22.2115 | 23.4900 | 24.1447 | 23.8264 |
| 24.0320                       |         | 24.0328 |         | 23.5173 |         |
| 23.1604                       |         | 23.9306 |         | 23.7704 |         |
| 23.0218                       |         | 23.7851 |         | 23.8730 |         |

level of theory: **m062x/aug-cc-pvdz**

**Table S28. Mean Absolute Errors (MAE) and Root Mean Square Deviations (RMS) of the 4 IP [C<sub>4</sub>mim][OH] Chemical Shifts Using the Modification of TMS Approach.**

| 4 IP [C <sub>4</sub> mim][OH]             |                 |      |                |                |                       |                |       |
|-------------------------------------------|-----------------|------|----------------|----------------|-----------------------|----------------|-------|
| Atom                                      | $\sigma$ calc.x | Atom | $\sigma$ ref.x | $\delta$ ref.x | $\delta$ calc.x (TMS) | $\delta$ exp.x | TMS   |
| H2                                        | 23.825          | H2'  | 24.701         | 9.23           | 8.676                 | 9.27           | 0.593 |
| H3                                        | 23.490          | H3'  | 23.814         | 7.79           | 8.008                 | 7.82           | 0.188 |
| H4                                        | 23.826          | H4'  | 23.707         | 7.75           | 7.672                 | 7.75           | 0.077 |
| H1                                        | 27.686          | H1'  | 27.645         | 4.24           | 3.812                 | 4.20           | 0.387 |
| H5                                        | 27.276          | H5'  | 27.489         | 3.72           | 4.222                 | 3.86           | 0.362 |
| H6                                        | 29.961          | H6'  | 30.223         | 1.25           | 1.537                 | 1.78           | 0.242 |
| H7                                        | 30.388          |      |                |                | 1.111                 | 1.25           | 0.139 |
| H8                                        | 31.051          |      |                |                | 0.447                 | 0.90           | 0.452 |
| Reference Compound: TMS                   |                 |      |                |                | RMS, ppm              |                | 0.609 |
| level of theory: <b>m062x/aug-cc-pvdz</b> |                 |      |                |                | MAE, ppm              |                | 0.410 |

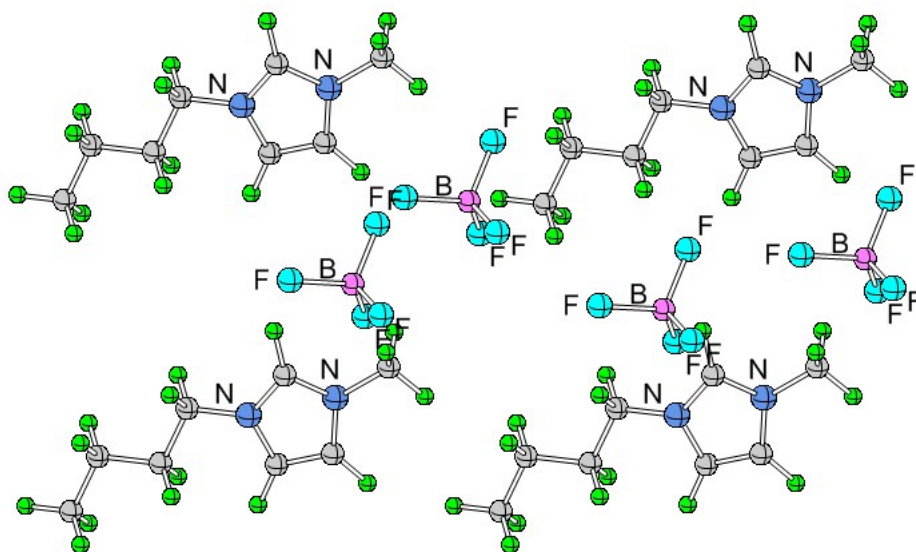

**Figure S24.** Structure of 4 IP [C<sub>4</sub>mim][BF<sub>4</sub>]

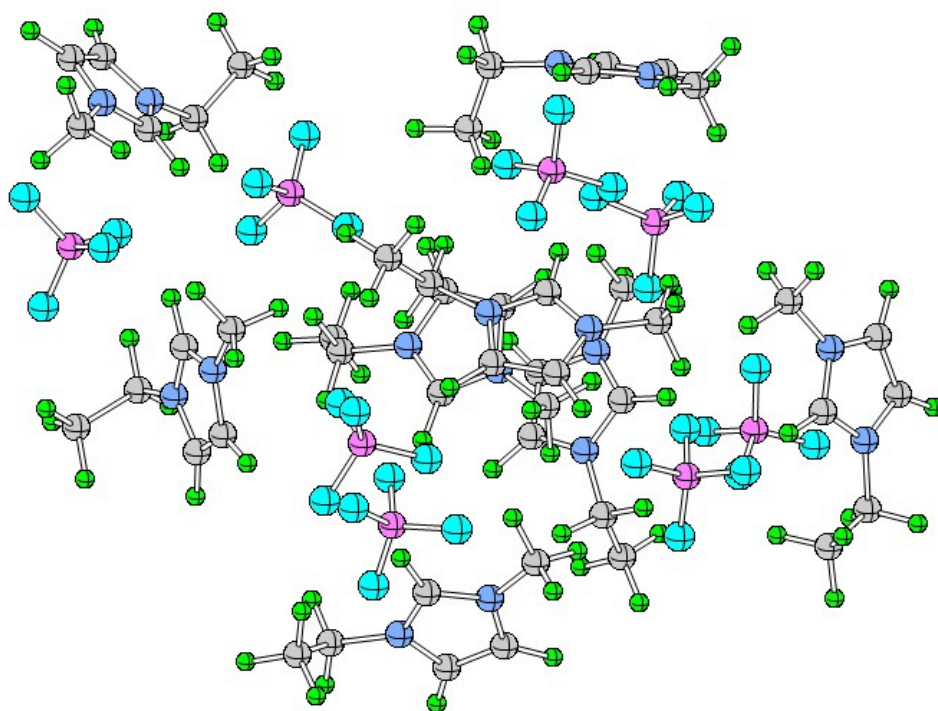

**Figure S25.** Structure of 8 IP [C<sub>2</sub>mim][BF<sub>4</sub>]

**Table S29.** Mean Value of the 4 IP [C<sub>4</sub>mim][BF<sub>4</sub>] Chemical Shifts

| 4 IP [C <sub>4</sub> mim][BF <sub>4</sub> ] |         |         |         |         |         |
|---------------------------------------------|---------|---------|---------|---------|---------|
| H2                                          | AVERAGE | H3      | AVERAGE | H4      | AVERAGE |
| 22.9579                                     | 22.9998 | 25.1438 | 25.0761 | 24.2722 | 24.8225 |
| 22.7141                                     |         | 25.2079 |         | 25.1010 |         |
| 23.2889                                     |         | 24.5681 |         | 24.6092 |         |
| 23.0382                                     |         | 25.3844 |         | 25.3075 |         |

**Table S30. Mean Absolute Errors (MAE) and Root Mean Square Deviations (RMS) of the 4IP [C<sub>4</sub>mim][BF<sub>4</sub>] Acetate Chemical Shifts Using the Modification of RRS Approach.**4 IP [C<sub>4</sub>mim][BF<sub>4</sub>]

| H                                                               | $\sigma_{\text{cal}}$ | $\sigma_{\text{ref}}$ | $\delta_{\text{ref}}$ | $\delta_{\text{cal}}$ (RRS) | $\delta_{\text{cal}}$ (TMS) | $\delta_{\text{exp}}$ | AE (RRS) | AE (TMS) |
|-----------------------------------------------------------------|-----------------------|-----------------------|-----------------------|-----------------------------|-----------------------------|-----------------------|----------|----------|
| H1                                                              | 23.000                | 23.028                | 8.550                 | 8.713                       | 9.157                       | 8.770                 | 0.057    | 0.387    |
| H2                                                              | 25.077                | 25.541                | 7.350                 | 7.814                       | 6.944                       | 7.690                 | 0.123    | 0.746    |
| H3                                                              | 24.823                | 24.916                | 7.410                 | 7.452                       | 7.148                       | 7.630                 | 0.178    | 0.482    |
| H4                                                              | 28.383                | 28.264                | 4.140                 | 4.259                       | 3.638                       | 4.040                 | 0.219    | 0.402    |
| H5                                                              | 28.039                | 27.950                | 3.830                 | 3.920                       | 3.982                       | 4.320                 | 0.400    | 0.338    |
| H6                                                              | 30.123                | 30.509                | 1.410                 | 1.796                       | 1.898                       | 1.930                 | 0.134    | 0.032    |
| H7                                                              | 30.628                |                       |                       |                             | 1.393                       | 1.380                 |          | 0.013    |
| H8                                                              | 31.150                |                       |                       |                             | 0.872                       | 0.940                 |          | 0.068    |
| Reference Compound: 8 IP [C <sub>2</sub> mim][BF <sub>4</sub> ] |                       |                       |                       |                             | RMS, ppm                    |                       | 0.214    | 0.390    |
| level of theory: <b>mp2/aug-cc-pvdz</b>                         |                       |                       |                       |                             | MAE, ppm                    |                       | 0.185    | 0.308    |

## --Cartesian coordinates of optimized ILs

**Table S31. Cartesian coordinates**

| 1-methylimidazole                      | m062x/aug-cc-pvdz | x       | y       | z       |
|----------------------------------------|-------------------|---------|---------|---------|
|                                        | C                 | 0.1905  | -1.0845 | 0.0002  |
|                                        | N                 | 1.4713  | -0.7677 | -0.0001 |
|                                        | C                 | 1.5021  | 0.6064  | -0.0001 |
|                                        | C                 | 0.2223  | 1.1084  | -0.0001 |
|                                        | N                 | -0.6040 | 0.0138  | -0.0001 |
|                                        | C                 | -2.0563 | 0.0345  | 0.0001  |
|                                        | H                 | -0.2226 | -2.0877 | 0.0003  |
|                                        | H                 | 2.4359  | 1.1583  | -0.0002 |
|                                        | H                 | -0.1677 | 2.1197  | -0.0002 |
|                                        | H                 | -2.4245 | 0.5451  | 0.8965  |
|                                        | H                 | -2.4245 | 0.5504  | -0.8933 |
|                                        | H                 | -2.4193 | -0.9969 | -0.0030 |
| TMS                                    | m062x/aug-cc-pvdz |         |         |         |
|                                        | Si                | 0.0000  | 0.0000  | 0.0000  |
|                                        | C                 | 1.0890  | 1.0890  | 1.0890  |
|                                        | C                 | -1.0890 | -1.0890 | 1.0890  |
|                                        | C                 | -1.0890 | 1.0890  | -1.0890 |
|                                        | C                 | 1.0890  | -1.0890 | -1.0890 |
|                                        | H                 | 1.7356  | 1.7356  | 0.4793  |
|                                        | H                 | 0.4793  | 1.7356  | 1.7356  |
|                                        | H                 | 1.7356  | 0.4793  | 1.7356  |
|                                        | H                 | -1.7356 | -0.4793 | 1.7356  |
|                                        | H                 | -1.7356 | -1.7356 | 0.4793  |
|                                        | H                 | -0.4793 | -1.7356 | 1.7356  |
|                                        | H                 | -1.7356 | 0.4793  | -1.7356 |
|                                        | H                 | -1.7356 | 1.7356  | -0.4793 |
|                                        | H                 | -0.4793 | 1.7356  | -1.7356 |
|                                        | H                 | 1.7356  | -1.7356 | -0.4793 |
|                                        | H                 | 1.7356  | -0.4793 | -1.7356 |
|                                        | H                 | 0.4793  | -1.7356 | -1.7356 |
| [C <sub>2</sub> mim][BF <sub>4</sub> ] | m062x/aug-cc-pvdz |         |         |         |
|                                        | C                 | -1.7276 | -2.1042 | -0.9164 |
|                                        | N                 | -2.1749 | -1.2338 | 0.0512  |
|                                        | C                 | -1.1475 | -0.8900 | 0.8230  |

|   |         |         |         |
|---|---------|---------|---------|
| N | -0.0580 | -1.5189 | 0.3930  |
| C | -0.3937 | -2.2837 | -0.7016 |
| C | -3.5179 | -0.6682 | 0.1364  |
| C | 1.2964  | -1.3129 | 0.9195  |
| C | 2.2127  | -0.7160 | -0.1405 |
| F | -0.5566 | 1.0290  | -1.1699 |
| B | -0.6565 | 1.9357  | -0.0901 |
| F | 0.2976  | 1.5792  | 0.8983  |
| F | -1.9510 | 1.8263  | 0.4789  |
| F | -0.4286 | 3.2436  | -0.5277 |
| H | -1.1811 | -0.1722 | 1.6313  |
| H | 0.3326  | -2.8875 | -1.2281 |
| H | -2.3902 | -2.5175 | -1.6648 |
| H | -4.2474 | -1.4720 | 0.0132  |
| H | -3.6335 | -0.1986 | 1.1144  |
| H | -3.6347 | 0.0889  | -0.6431 |
| H | 1.6704  | -2.2772 | 1.2820  |
| H | 1.1953  | -0.6267 | 1.7654  |
| H | 2.3595  | -1.4414 | -0.9535 |
| H | 1.7179  | 0.1672  | -0.5611 |
| H | 3.1602  | -0.4488 | 0.2788  |

---

[C<sub>2</sub>mim][EtSO<sub>4</sub>] m062x/aug-cc-pvdz

|   |         |         |         |
|---|---------|---------|---------|
| C | 1.5170  | -0.4083 | 0.0472  |
| N | 2.6860  | -1.0212 | -0.1375 |
| C | 3.7041  | -0.1143 | 0.0512  |
| C | 3.1161  | 1.0779  | 0.3551  |
| N | 1.7562  | 0.8672  | 0.3507  |
| C | 2.8499  | -2.4343 | -0.4667 |
| C | 0.7264  | 1.8913  | 0.5812  |
| C | 0.4910  | 2.7250  | -0.6668 |
| H | 0.5383  | -0.8789 | -0.0470 |
| H | 4.7459  | -0.3946 | -0.0389 |
| H | 3.5456  | 2.0468  | 0.5776  |
| H | 3.4162  | -2.5204 | -1.3983 |
| H | 3.3810  | -2.9349 | 0.3477  |
| H | 1.8580  | -2.8744 | -0.5908 |
| H | 1.0775  | 2.5054  | 1.4161  |
| H | -0.1748 | 1.3536  | 0.8904  |
| H | 0.1211  | 2.0954  | -1.4845 |

|   |         |         |         |
|---|---------|---------|---------|
| H | 1.4126  | 3.2264  | -0.9869 |
| S | -2.1043 | -0.8255 | 0.1557  |
| O | -1.2390 | -1.8058 | -0.5552 |
| O | -1.5374 | -0.3690 | 1.4583  |
| O | -1.9654 | 0.4934  | -0.8500 |
| O | -3.5457 | -1.1593 | 0.2003  |
| C | -2.7377 | 1.6211  | -0.4356 |
| H | -2.5883 | 2.3908  | -1.1991 |
| H | -3.8018 | 1.3609  | -0.3837 |
| H | -2.3991 | 1.9904  | 0.5421  |
| H | -0.2591 | 3.4939  | -0.4483 |

---

[C<sub>2</sub>mim][OAC] m062x/aug-cc-pvdz

|   |         |         |         |
|---|---------|---------|---------|
| C | -0.6121 | 0.3551  | -0.0816 |
| N | -1.1420 | 1.5713  | 0.0418  |
| C | -2.5085 | 1.4858  | -0.1075 |
| C | -2.7997 | 0.1708  | -0.3246 |
| N | -1.6019 | -0.5084 | -0.3073 |
| C | -0.3687 | 2.7860  | 0.2905  |
| C | -1.4110 | -1.9570 | -0.4575 |
| C | -1.8549 | -2.7051 | 0.7882  |
| H | 0.4498  | 0.0940  | -0.0174 |
| H | -3.1478 | 2.3579  | -0.0546 |
| H | -3.7445 | -0.3293 | -0.4959 |
| H | -0.6892 | 3.2256  | 1.2397  |
| H | 0.6860  | 2.4982  | 0.3361  |
| H | -0.5391 | 3.4925  | -0.5272 |
| H | -0.3427 | -2.1001 | -0.6474 |
| H | -1.9793 | -2.2684 | -1.3397 |
| H | -2.9179 | -2.5342 | 0.9976  |
| H | -1.2636 | -2.3885 | 1.6555  |
| C | 2.7857  | -0.1731 | 0.0045  |
| C | 4.2800  | -0.4522 | -0.1332 |
| O | 2.4203  | 1.0099  | 0.2410  |
| O | 2.0050  | -1.1555 | -0.1471 |
| H | 4.8772  | 0.4110  | 0.1764  |
| H | 4.5519  | -1.3334 | 0.4604  |
| H | 4.4991  | -0.6830 | -1.1847 |
| H | -1.7001 | -3.7792 | 0.6354  |

---

---

[C<sub>2</sub>mim][OTs] b3lyp/6-31++g(d,p)-d3

|   |         |         |         |
|---|---------|---------|---------|
| C | 1.0137  | -0.7682 | 1.2570  |
| N | 1.9170  | 0.1766  | 1.5428  |
| C | 3.0971  | -0.1194 | 0.8832  |
| C | 2.8907  | -1.2822 | 0.2001  |
| N | 1.5870  | -1.6746 | 0.4551  |
| C | 1.6907  | 1.3423  | 2.3976  |
| C | 0.9024  | -2.8693 | -0.0803 |
| C | 1.2318  | -3.1199 | -1.5438 |
| H | -0.0093 | -0.7963 | 1.6050  |
| H | 3.9650  | 0.5156  | 0.9602  |
| H | 3.5508  | -1.8512 | -0.4332 |
| H | 1.9790  | 2.2431  | 1.8564  |
| H | 0.6332  | 1.3871  | 2.6514  |
| H | 2.2886  | 1.2465  | 3.3058  |
| H | -0.1654 | -2.6950 | 0.0591  |
| H | 1.1934  | -3.7245 | 0.5354  |
| H | 2.2865  | -3.3716 | -1.6838 |
| H | 0.9907  | -2.2515 | -2.1617 |
| O | -3.8191 | 0.8283  | 0.5938  |
| S | -2.7960 | -0.1960 | 0.2052  |
| O | -2.2697 | -0.9523 | 1.3950  |
| O | -3.2652 | -1.1116 | -0.8843 |
| C | -1.3890 | 0.7040  | -0.4508 |
| C | -1.0442 | 1.9408  | 0.0985  |
| C | 0.1269  | 2.5708  | -0.3200 |
| C | 0.9725  | 1.9765  | -1.2687 |
| C | 2.2804  | 2.6198  | -1.6438 |
| C | 0.5926  | 0.7447  | -1.8209 |
| C | -0.5807 | 0.1071  | -1.4197 |
| H | -1.6755 | 2.4039  | 0.8487  |
| H | 0.3985  | 3.5302  | 0.1105  |
| H | 2.2327  | 3.7080  | -1.5458 |
| H | 3.0797  | 2.2627  | -0.9818 |
| H | 2.5690  | 2.3704  | -2.6690 |
| H | 1.2301  | 0.2704  | -2.5613 |
| H | -0.8534 | -0.8531 | -1.8413 |
| C | 0.3922  | -4.3152 | -2.0316 |

---

[C<sub>2</sub>mim][PF<sub>6</sub>] b3lyp/6-31++g(d,p)-d3

|   |         |         |         |
|---|---------|---------|---------|
| C | 1.6587  | -0.4133 | -0.6940 |
| N | 1.9387  | -1.5801 | -0.1036 |
| C | 3.0830  | -1.4297 | 0.6598  |
| C | 3.4891  | -0.1350 | 0.5177  |
| N | 2.5871  | 0.4799  | -0.3333 |
| C | 1.1476  | -2.8073 | -0.2215 |
| C | 2.5865  | 1.9085  | -0.6989 |
| C | 2.0970  | 2.7798  | 0.4517  |
| H | 0.8024  | -0.2157 | -1.3176 |
| H | 3.4992  | -2.2474 | 1.2265  |
| H | 4.3275  | 0.3951  | 0.9402  |
| H | 0.8482  | -3.1338 | 0.7754  |
| H | 0.2589  | -2.5934 | -0.8117 |
| H | 1.7473  | -3.5798 | -0.7068 |
| H | 1.9426  | 2.0094  | -1.5741 |
| H | 3.6072  | 2.1636  | -0.9936 |
| H | 2.1025  | 3.8274  | 0.1353  |
| H | 2.7466  | 2.6835  | 1.3270  |
| H | 1.0769  | 2.5090  | 0.7363  |
| P | -2.0240 | 0.0961  | 0.0517  |
| F | -2.5779 | 1.0381  | 1.2725  |
| F | -1.4444 | -0.8476 | -1.1801 |
| F | -0.8429 | -0.4961 | 1.0388  |
| F | -3.1839 | 0.6819  | -0.9474 |
| F | -1.0036 | 1.3039  | -0.4242 |
| F | -3.0196 | -1.1220 | 0.5133  |

---

[C<sub>2</sub>mim][Tf<sub>2</sub>N] b3lyp/6-31++g(d,p)-d3

|   |        |         |         |
|---|--------|---------|---------|
| C | 1.5783 | -1.8093 | 2.2754  |
| C | 2.1568 | -2.3267 | 0.9636  |
| C | 3.7347 | 1.5948  | -1.6099 |
| N | 3.0641 | -1.3418 | 0.3408  |
| C | 4.4354 | -1.2720 | 0.5062  |
| C | 4.8659 | -0.1789 | -0.1899 |
| N | 3.7461 | 0.4001  | -0.7612 |
| C | 2.6686 | -0.3203 | -0.4284 |
| H | 0.9330 | -2.5787 | 2.7102  |
| H | 2.3693 | -1.5739 | 2.9946  |
| H | 0.9744 | -0.9137 | 2.1073  |
| H | 1.3664 | -2.5343 | 0.2413  |



|   |         |         |         |
|---|---------|---------|---------|
| H | 2.7427  | -3.2356 | 1.1116  |
| H | 4.2639  | 2.4002  | -1.0982 |
| H | 4.2232  | 1.3715  | -2.5605 |
| H | 2.6993  | 1.8888  | -1.7796 |
| H | 4.9753  | -1.9986 | 1.0924  |
| H | 5.8534  | 0.2307  | -0.3312 |
| H | 1.6402  | -0.1087 | -0.6939 |
| N | -0.4502 | 0.0905  | -0.5153 |
| S | -1.3314 | -1.1062 | -1.1449 |
| S | -0.8168 | 1.6675  | -0.6022 |
| O | -2.1459 | 2.0162  | -1.1120 |
| O | -2.1044 | -0.7690 | -2.3433 |
| O | -0.4743 | -2.3005 | -1.1491 |
| C | -2.6205 | -1.5052 | 0.1685  |
| C | -0.8674 | 2.0811  | 1.2329  |
| F | -3.4836 | -0.4931 | 0.3174  |
| F | -3.3001 | -2.6037 | -0.1952 |
| F | -2.0239 | -1.7431 | 1.3487  |
| F | -1.8151 | 1.3703  | 1.8580  |
| F | -1.1375 | 3.3864  | 1.3816  |
| F | 0.3164  | 1.8213  | 1.8134  |
| O | 0.3613  | 2.4041  | -1.0852 |

---

[C<sub>2</sub>mim][TFA] b3lyp/6-31++g(d,p)-d3

|   |        |         |         |
|---|--------|---------|---------|
| C | 1.6598 | -0.4393 | -0.0602 |
| N | 2.4826 | -1.4928 | 0.0463  |
| C | 3.7908 | -1.0608 | -0.0972 |
| C | 3.7390 | 0.2887  | -0.2929 |
| N | 2.4028 | 0.6546  | -0.2680 |
| C | 2.0195 | -2.8665 | 0.2705  |
| C | 1.8506 | 2.0208  | -0.4247 |
| C | 2.1436 | 2.8982  | 0.7905  |
| H | 0.5570 | -0.5152 | 0.0046  |
| H | 4.6299 | -1.7383 | -0.0533 |
| H | 4.5283 | 1.0075  | -0.4509 |
| H | 2.4266 | -3.2437 | 1.2122  |
| H | 0.9290 | -2.8512 | 0.3186  |
| H | 2.3437 | -3.5034 | -0.5565 |
| H | 0.7723 | 1.8922  | -0.5660 |
| H | 2.2871 | 2.4386  | -1.3377 |

|   |         |         |         |
|---|---------|---------|---------|
| H | 1.7104  | 3.8901  | 0.6236  |
| H | 3.2187  | 3.0226  | 0.9671  |
| H | 1.6842  | 2.4789  | 1.6915  |
| C | -1.7098 | 0.0151  | -0.1002 |
| C | -3.2705 | -0.0509 | -0.0057 |
| O | -1.2098 | 1.1262  | -0.3699 |
| O | -1.1314 | -1.0792 | 0.1368  |
| F | -3.8839 | 1.0451  | -0.5014 |
| F | -3.7743 | -1.1204 | -0.6718 |
| F | -3.6633 | -0.1712 | 1.2936  |

---

| Conf1.[C <sub>4</sub> mim][BF <sub>4</sub> ] | m062x/aug-cc-pvdz | Energy= | -847.6574 |
|----------------------------------------------|-------------------|---------|-----------|
| C                                            | -1.7455           | -2.0583 | -0.9057   |
| N                                            | -2.2000           | -1.1750 | 0.0477    |
| C                                            | -1.1804           | -0.8412 | 0.8352    |
| N                                            | -0.0941           | -1.4955 | 0.4350    |
| C                                            | -0.4231           | -2.2604 | -0.6620   |
| C                                            | -3.5183           | -0.5450 | 0.0647    |
| C                                            | 1.2638            | -1.2759 | 0.9563    |
| C                                            | 2.1830            | -0.7272 | -0.1305   |
| C                                            | 3.5268            | -0.2912 | 0.4508    |
| C                                            | 4.4918            | 0.1623  | -0.6426   |
| F                                            | -0.4673           | 0.9447  | -1.1355   |
| B                                            | -0.6069           | 1.8968  | -0.0944   |
| F                                            | 0.2655            | 1.5022  | 0.9609    |
| F                                            | -1.9344           | 1.8010  | 0.3998    |
| F                                            | -0.3153           | 3.1651  | -0.5286   |
| H                                            | -1.2109           | -0.0968 | 1.6167    |
| H                                            | 0.3050            | -2.8709 | -1.1720   |
| H                                            | -2.3962           | -2.4538 | -1.6698   |
| H                                            | -4.2701           | -1.3033 | -0.1581   |
| H                                            | -3.6923           | -0.1219 | 1.0526    |
| H                                            | -3.5305           | 0.2634  | -0.6670   |
| H                                            | 1.6291            | -2.2253 | 1.3616    |
| H                                            | 1.1665            | -0.5510 | 1.7662    |
| H                                            | 2.3466            | -1.4952 | -0.8994   |
| H                                            | 1.6808            | 0.1210  | -0.6063   |
| H                                            | 3.3546            | 0.5292  | 1.1579    |
| H                                            | 3.9750            | -1.1172 | 1.0211    |
| H                                            | 5.4468            | 0.4893  | -0.2210   |

|   |        |         |         |
|---|--------|---------|---------|
| H | 4.6954 | -0.6526 | -1.3463 |
| H | 4.0687 | 0.9977  | -1.2097 |

---

| Conf2.[C <sub>4</sub> mim][BF <sub>4</sub> ] | m062x/aug-cc-pvdz | Energy= | -847.6582 |
|----------------------------------------------|-------------------|---------|-----------|
| C                                            | 0.6475            | 2.9312  | 0.4830    |
| N                                            | 1.3237            | 2.0275  | -0.3210   |
| C                                            | 0.5957            | 0.9110  | -0.4112   |
| N                                            | -0.5210           | 1.0656  | 0.3025    |
| C                                            | -0.5089           | 2.3263  | 0.8746    |
| C                                            | 2.6603            | 2.1798  | -0.9062   |
| C                                            | -1.4946           | -0.0199 | 0.5361    |
| C                                            | -2.8256           | 0.2207  | -0.1785   |
| C                                            | -3.8187           | -0.9204 | 0.0810    |
| C                                            | -5.1602           | -0.7105 | -0.6281   |
| F                                            | 1.3938            | -1.1557 | 1.2687    |
| B                                            | 1.8951            | -1.7919 | 0.1136    |
| F                                            | 2.4329            | -3.0215 | 0.3825    |
| F                                            | 2.8451            | -0.9252 | -0.5001   |
| F                                            | 0.7928            | -1.8995 | -0.8086   |
| H                                            | 0.8660            | 0.0039  | -0.9363   |
| H                                            | -1.3042           | 2.6726  | 1.5153    |
| H                                            | 1.0501            | 3.9054  | 0.7112    |
| H                                            | 3.2663            | 2.7927  | -0.2365   |
| H                                            | 3.0951            | 1.1818  | -0.9852   |
| H                                            | 2.5944            | 2.6597  | -1.8865   |
| H                                            | -1.6288           | -0.0979 | 1.6195    |
| H                                            | -1.0032           | -0.9345 | 0.1980    |
| H                                            | -3.2634           | 1.1737  | 0.1515    |
| H                                            | -2.6422           | 0.3153  | -1.2571   |
| H                                            | -3.3714           | -1.8678 | -0.2468   |
| H                                            | -3.9860           | -1.0181 | 1.1627    |
| H                                            | -5.8465           | -1.5395 | -0.4250   |
| H                                            | -5.6465           | 0.2147  | -0.2952   |
| H                                            | -5.0286           | -0.6455 | -1.7147   |

---

| Conf3.[C <sub>4</sub> mim][BF <sub>4</sub> ] | m062x/aug-cc-pvdz | Energy= | -847.6530 |
|----------------------------------------------|-------------------|---------|-----------|
| C                                            | -2.2181           | -2.2367 | -0.5901   |
| N                                            | -2.3977           | -0.9552 | -0.0965   |
| C                                            | -0.9728           | -2.6378 | -0.2075   |
| C                                            | -1.2967           | -0.6082 | 0.5600    |

|   |         |         |         |
|---|---------|---------|---------|
| N | -0.4168 | -1.5993 | 0.5202  |
| C | -3.5399 | -0.0615 | -0.3173 |
| H | -3.8819 | -0.1762 | -1.3452 |
| H | -4.3522 | -0.3061 | 0.3713  |
| H | -3.1866 | 0.9658  | -0.1578 |
| C | 0.9833  | -1.4746 | 0.9781  |
| C | 1.9292  | -1.1584 | -0.1851 |
| C | 3.3133  | -0.7387 | 0.3252  |
| C | 4.3010  | -0.4755 | -0.8147 |
| H | 5.2736  | -0.1558 | -0.4280 |
| H | 4.4619  | -1.3754 | -1.4194 |
| H | 3.9302  | 0.3120  | -1.4787 |
| H | 3.1904  | 0.1719  | 0.9237  |
| H | 3.7203  | -1.5095 | 0.9951  |
| H | 2.0135  | -2.0325 | -0.8454 |
| H | 1.4874  | -0.3394 | -0.7604 |
| H | 0.9937  | -0.6466 | 1.6903  |
| H | 1.2481  | -2.4016 | 1.4958  |
| H | -1.1010 | 0.5082  | 1.0923  |
| H | -2.9734 | -2.7388 | -1.1603 |
| H | -0.4430 | -3.5539 | -0.3905 |
| B | -0.1174 | 2.1746  | -0.0219 |
| F | 0.3940  | 3.4135  | -0.2947 |
| F | 0.5763  | 1.5481  | 1.0620  |
| F | -0.0421 | 1.3021  | -1.1325 |
| F | -1.4935 | 2.2512  | 0.3729  |

---

|                                              |                   |          |           |
|----------------------------------------------|-------------------|----------|-----------|
| Conf4.[C <sub>4</sub> mim][BF <sub>4</sub> ] | m062x/aug-cc-pvdz | Energy = | -847.6300 |
| C                                            | -1.74549          | -2.05826 | -0.90571  |
| N                                            | -2.19996          | -1.17497 | 0.04773   |
| C                                            | -1.18038          | -0.84117 | 0.83523   |
| N                                            | -0.09412          | -1.49553 | 0.43499   |
| C                                            | -0.42307          | -2.26037 | -0.66197  |
| C                                            | -3.51832          | -0.54502 | 0.06465   |
| C                                            | 1.26375           | -1.27587 | 0.95633   |
| C                                            | 2.18296           | -0.72719 | -0.13053  |
| C                                            | 3.52676           | -0.29121 | 0.45081   |
| C                                            | 4.49177           | 0.16226  | -0.64257  |
| F                                            | 7.68053           | 0.60883  | -1.13552  |
| B                                            | 8.01211           | 1.5121   | -0.0944   |

|   |          |          |          |
|---|----------|----------|----------|
| F | 8.59052  | 0.7491   | 0.9609   |
| F | 6.79978  | 2.06142  | 0.3998   |
| F | 8.87354  | 2.48764  | -0.52861 |
| H | -1.21086 | -0.09679 | 1.61674  |
| H | 0.30498  | -2.87089 | -1.17198 |
| H | -2.39618 | -2.45383 | -1.66976 |
| H | -4.27012 | -1.30327 | -0.15814 |
| H | -3.69233 | -0.12191 | 1.05264  |
| H | -3.53052 | 0.26336  | -0.66703 |
| H | 1.62908  | -2.22529 | 1.36157  |
| H | 1.16654  | -0.55098 | 1.76619  |
| H | 2.34659  | -1.49517 | -0.89944 |
| H | 1.68076  | 0.121    | -0.60633 |
| H | 3.35459  | 0.52918  | 1.15794  |
| H | 3.97498  | -1.11721 | 1.02112  |
| H | 5.44678  | 0.48927  | -0.22103 |
| H | 4.69541  | -0.65259 | -1.34627 |
| H | 4.06865  | 0.99773  | -1.20972 |

---

[C<sub>4</sub>mim][MeSO<sub>4</sub>] m062x/aug-cc-pvdz

|   |         |         |         |
|---|---------|---------|---------|
| C | -1.8307 | -0.1561 | -0.4319 |
| N | -2.9388 | -0.4819 | 0.2306  |
| C | -3.5883 | 0.6706  | 0.6107  |
| C | -2.8321 | 1.7143  | 0.1632  |
| N | -1.7466 | 1.1719  | -0.4867 |
| C | -3.3687 | -1.8506 | 0.5048  |
| C | -0.5962 | 1.9095  | -1.0251 |
| C | 0.3947  | 2.2561  | 0.0780  |
| C | 1.6556  | 2.8964  | -0.4947 |
| C | 2.5968  | 3.3879  | 0.6002  |
| H | -1.1021 | -0.8544 | -0.8284 |
| H | -4.5194 | 0.6493  | 1.1623  |
| H | -2.9744 | 2.7842  | 0.2488  |
| H | -3.5974 | -1.9399 | 1.5702  |
| H | -4.2535 | -2.0848 | -0.0943 |
| H | -2.5430 | -2.5183 | 0.2456  |
| H | -0.9878 | 2.8078  | -1.5143 |
| H | -0.1270 | 1.2610  | -1.7697 |
| H | 0.6563  | 1.3321  | 0.6124  |
| H | -0.0815 | 2.9378  | 0.7980  |

|   |         |         |         |
|---|---------|---------|---------|
| H | 1.3770  | 3.7395  | -1.1439 |
| H | 2.1669  | 2.1598  | -1.1306 |
| H | 3.5178  | 3.8046  | 0.1745  |
| H | 2.8760  | 2.5672  | 1.2739  |
| H | 2.1170  | 4.1702  | 1.2035  |
| S | 1.2649  | -1.8714 | -0.3090 |
| O | -0.0005 | -2.6252 | -0.0960 |
| O | 1.1174  | -0.7374 | -1.2720 |
| O | 1.4633  | -1.1465 | 1.1704  |
| O | 2.4759  | -2.6957 | -0.5249 |
| C | 2.6780  | -0.4015 | 1.2828  |
| H | 2.6041  | 0.1572  | 2.2214  |
| H | 3.5405  | -1.0775 | 1.3206  |
| H | 2.7872  | 0.2939  | 0.4395  |

---

[C<sub>4</sub>mim][OAc] m062x/aug-cc-pvdz

|   |         |         |         |
|---|---------|---------|---------|
| C | 0.8052  | 0.9868  | -0.1688 |
| N | 1.4346  | 2.1004  | 0.2034  |
| C | 0.5625  | 3.1628  | 0.1191  |
| C | -0.6281 | 2.6587  | -0.3169 |
| N | -0.4475 | 1.3045  | -0.4920 |
| C | 2.8318  | 2.1444  | 0.6262  |
| C | -1.4660 | 0.3285  | -0.8993 |
| C | -2.4657 | 0.0687  | 0.2190  |
| C | -3.4956 | -0.9776 | -0.1966 |
| C | -4.5134 | -1.2515 | 0.9052  |
| H | 1.2486  | -0.0135 | -0.1957 |
| H | 0.8591  | 4.1734  | 0.3694  |
| H | -1.5733 | 3.1458  | -0.5204 |
| H | 2.8873  | 2.5352  | 1.6464  |
| H | 3.2169  | 1.1210  | 0.5911  |
| H | 3.3963  | 2.7873  | -0.0554 |
| H | -0.9210 | -0.5870 | -1.1527 |
| H | -1.9608 | 0.7239  | -1.7934 |
| H | -2.9729 | 1.0065  | 0.4901  |
| H | -1.9178 | -0.2796 | 1.1061  |
| H | -2.9715 | -1.9075 | -0.4583 |
| H | -4.0141 | -0.6365 | -1.1046 |
| H | -5.2408 | -2.0104 | 0.5914  |
| H | -5.0667 | -0.3386 | 1.1646  |

|   |         |         |         |
|---|---------|---------|---------|
| H | -4.0144 | -1.6155 | 1.8134  |
| C | 1.9618  | -2.2414 | -0.1102 |
| C | 2.4221  | -3.6739 | 0.1454  |
| O | 2.7625  | -1.3087 | 0.1801  |
| O | 0.7973  | -2.0781 | -0.5670 |
| H | 3.5144  | -3.7470 | 0.1195  |
| H | 2.0806  | -3.9705 | 1.1474  |
| H | 1.9742  | -4.3605 | -0.5813 |

---

[C<sub>4</sub>mim][OTs] b3lyp/6-31++g(d,p)-d3

|   |         |         |         |
|---|---------|---------|---------|
| C | 2.4587  | -1.3122 | -0.5456 |
| N | 2.9229  | -2.3537 | 0.1554  |
| C | 4.1854  | -2.0403 | 0.6288  |
| C | 4.4695  | -0.7749 | 0.2035  |
| N | 3.3784  | -0.3402 | -0.5288 |
| C | 2.1568  | -3.5806 | 0.4125  |
| C | 3.1572  | 1.0165  | -1.0756 |
| C | 2.8938  | 2.0440  | 0.0302  |
| H | 1.4710  | -1.2081 | -0.9976 |
| H | 4.7605  | -2.7323 | 1.2244  |
| H | 5.3375  | -0.1546 | 0.3643  |
| H | 2.4699  | -3.9873 | 1.3758  |
| H | 1.0992  | -3.3051 | 0.4563  |
| H | 2.3450  | -4.3125 | -0.3780 |
| H | 2.2884  | 0.9403  | -1.7339 |
| H | 4.0362  | 1.2746  | -1.6767 |
| H | 3.7577  | 2.0872  | 0.7100  |
| H | 2.0231  | 1.7132  | 0.6097  |
| O | -0.1623 | 0.7448  | 1.0609  |
| S | -0.6564 | -0.3307 | 0.1580  |
| O | -0.1513 | -0.1923 | -1.2568 |
| O | -0.4082 | -1.7172 | 0.6742  |
| C | -2.4479 | -0.1354 | 0.0613  |
| C | -3.1057 | 0.7281  | 0.9344  |
| C | -4.4977 | 0.8513  | 0.8645  |
| C | -5.2457 | 0.1214  | -0.0673 |
| C | -6.7489 | 0.2627  | -0.1507 |
| C | -4.5594 | -0.7441 | -0.9366 |
| C | -3.1737 | -0.8764 | -0.8768 |
| H | -2.5275 | 1.2986  | 1.6542  |

|   |         |         |         |
|---|---------|---------|---------|
| H | -5.0069 | 1.5287  | 1.5474  |
| H | -7.1348 | 0.9031  | 0.6497  |
| H | -7.0556 | 0.7052  | -1.1078 |
| H | -7.2480 | -0.7113 | -0.0712 |
| H | -5.1197 | -1.3207 | -1.6708 |
| H | -2.6531 | -1.5431 | -1.5578 |
| C | 2.6258  | 3.4384  | -0.5534 |
| H | 1.7547  | 3.3835  | -1.2199 |
| H | 3.4781  | 3.7570  | -1.1730 |
| C | 2.3649  | 4.4837  | 0.5375  |
| H | 3.2294  | 4.5852  | 1.2064  |
| H | 2.1638  | 5.4686  | 0.1001  |
| H | 1.4988  | 4.2020  | 1.1476  |

---

[C<sub>4</sub>mim][PF<sub>6</sub>] b3lyp/6-31++g(d,p)-d3

|   |         |         |         |
|---|---------|---------|---------|
| C | 1.0405  | 1.3134  | 0.5525  |
| N | 1.2308  | 2.3613  | -0.2562 |
| C | 2.5591  | 2.3801  | -0.6460 |
| C | 3.1660  | 1.3131  | -0.0515 |
| N | 2.1980  | 0.6584  | 0.6925  |
| C | 0.1757  | 3.2827  | -0.6996 |
| C | 2.3727  | -0.5899 | 1.4694  |
| C | 2.8266  | -1.7720 | 0.6050  |
| H | 0.0956  | 1.0205  | 0.9860  |
| H | 2.9503  | 3.1385  | -1.3066 |
| H | 4.1870  | 0.9681  | -0.0972 |
| H | 0.1498  | 3.2931  | -1.7914 |
| H | -0.7796 | 2.9153  | -0.3243 |
| H | 0.3805  | 4.2857  | -0.3165 |
| H | 1.4028  | -0.7983 | 1.9265  |
| H | 3.0967  | -0.3802 | 2.2640  |
| H | 2.9907  | -2.6095 | 1.2973  |
| H | 3.8094  | -1.5532 | 0.1612  |
| P | -2.2033 | -0.2853 | 0.0317  |
| F | -2.3033 | -1.7941 | -0.5604 |
| F | -2.0064 | 1.2629  | 0.6490  |
| F | -0.9803 | 0.0611  | -1.0468 |
| F | -3.3487 | -0.5826 | 1.1400  |
| F | -1.0268 | -0.7873 | 1.1154  |
| F | -3.2989 | 0.2732  | -1.0281 |



|   |        |         |         |
|---|--------|---------|---------|
| C | 1.8292 | -2.1888 | -0.4851 |
| H | 1.6638 | -1.3564 | -1.1813 |
| H | 0.8529 | -2.3906 | -0.0292 |
| C | 2.3054 | -3.4184 | -1.2667 |
| H | 1.5764 | -3.6933 | -2.0364 |
| H | 3.2659 | -3.2327 | -1.7658 |
| H | 2.4346 | -4.2857 | -0.6066 |

---

[C4mim][Tf2N] b3lyp/6-31++g(d,p)-d3

|   |         |         |         |
|---|---------|---------|---------|
| C | -3.4892 | 0.6380  | -1.2736 |
| C | -3.0577 | 1.1553  | 0.1026  |
| C | -1.1732 | -2.4615 | 2.9321  |
| N | -2.9608 | 0.0712  | 1.1064  |
| C | -4.0063 | -0.4601 | 1.8396  |
| C | -3.4908 | -1.4663 | 2.6033  |
| N | -2.1386 | -1.5378 | 2.3184  |
| C | -1.8398 | -0.5977 | 1.4100  |
| H | -2.7615 | -0.1096 | -1.6158 |
| H | -4.4612 | 0.1293  | -1.1958 |
| H | -3.7722 | 1.8846  | 0.4976  |
| H | -2.0743 | 1.6288  | 0.0484  |
| H | -0.9917 | -2.1634 | 3.9682  |
| H | -1.5848 | -3.4728 | 2.9023  |
| H | -0.2442 | -2.4301 | 2.3593  |
| H | -5.0128 | -0.0794 | 1.7579  |
| H | -3.9601 | -2.1260 | 3.3169  |
| H | -0.8502 | -0.4068 | 0.9833  |
| N | 0.9024  | -0.0556 | 0.1309  |
| S | 1.2844  | 1.4730  | -0.2822 |
| S | 1.8475  | -1.3663 | -0.0657 |
| O | 3.2906  | -1.1452 | -0.0953 |
| O | 2.2688  | 1.6406  | -1.3479 |
| O | 0.0047  | 2.2021  | -0.3373 |
| C | 2.1012  | 2.1571  | 1.2787  |
| C | 1.3912  | -1.9822 | -1.7936 |
| F | 3.2403  | 1.5150  | 1.5506  |
| F | 2.3630  | 3.4603  | 1.1074  |
| F | 1.2721  | 2.0247  | 2.3344  |
| F | 2.0223  | -3.1395 | -2.0352 |
| F | 1.7320  | -1.0944 | -2.7314 |

|   |         |         |         |
|---|---------|---------|---------|
| F | 0.0614  | -2.1988 | -1.8739 |
| O | 1.2749  | -2.4009 | 0.8154  |
| C | -3.5758 | 1.7792  | -2.2978 |
| H | -4.2955 | 2.5325  | -1.9456 |
| H | -2.6016 | 2.2816  | -2.3564 |
| C | -3.9882 | 1.2896  | -3.6907 |
| H | -4.0361 | 2.1232  | -4.4003 |
| H | -3.2686 | 0.5605  | -4.0826 |
| H | -4.9754 | 0.8101  | -3.6712 |

---

[C4mim][TFA] b3lyp/6-31++g(d,p)-d3

|   |         |         |         |
|---|---------|---------|---------|
| C | -1.0148 | -1.3133 | 0.2174  |
| N | -1.0911 | -2.5863 | -0.1911 |
| C | -2.4139 | -2.9929 | -0.1601 |
| C | -3.1464 | -1.9285 | 0.2781  |
| N | -2.2544 | -0.8959 | 0.5107  |
| C | 0.0518  | -3.4129 | -0.5922 |
| C | -2.6071 | 0.4679  | 0.9387  |
| C | -3.1015 | 1.3235  | -0.2272 |
| H | -0.1049 | -0.7109 | 0.3041  |
| H | -2.7092 | -3.9910 | -0.4427 |
| H | -4.2056 | -1.8172 | 0.4479  |
| H | -0.0999 | -3.7595 | -1.6164 |
| H | 0.9551  | -2.8021 | -0.5326 |
| H | 0.1302  | -4.2687 | 0.0816  |
| H | -1.7135 | 0.9012  | 1.3920  |
| H | -3.3717 | 0.3734  | 1.7143  |
| H | -3.9707 | 0.8395  | -0.6909 |
| H | -2.3142 | 1.3741  | -0.9892 |
| C | 2.4071  | -0.0846 | 0.0620  |
| C | 3.6690  | 0.8429  | 0.0152  |
| O | 1.3815  | 0.4926  | 0.4989  |
| O | 2.5654  | -1.2503 | -0.3505 |
| F | 3.5202  | 1.8169  | -0.9289 |
| F | 3.8808  | 1.4795  | 1.1986  |
| F | 4.8176  | 0.1910  | -0.2818 |
| C | -3.4754 | 2.7375  | 0.2280  |
| H | -4.2535 | 2.6770  | 1.0009  |
| H | -2.6023 | 3.2070  | 0.6995  |
| C | -3.9664 | 3.6125  | -0.9273 |

|   |         |        |         |
|---|---------|--------|---------|
| H | -4.8550 | 3.1793 | -1.4024 |
| H | -4.2299 | 4.6169 | -0.5785 |
| H | -3.1937 | 3.7183 | -1.6978 |

---

[2-me-Py][BF<sub>4</sub>] b3lyp/6-31++g(d,p)-d3

|   |         |         |         |
|---|---------|---------|---------|
| C | -1.8337 | 0.9418  | 0.0375  |
| C | -3.0986 | 0.3851  | -0.1476 |
| C | -3.2535 | -1.0027 | -0.1523 |
| C | -2.1438 | -1.8329 | 0.0261  |
| C | -0.9002 | -1.2467 | 0.2071  |
| N | -0.7924 | 0.0963  | 0.2124  |
| H | -3.9503 | 1.0416  | -0.2900 |
| H | -4.2397 | -1.4346 | -0.2984 |
| H | -2.2339 | -2.9132 | 0.0212  |
| H | 0.0344  | -1.7812 | 0.3464  |
| B | 2.4194  | -0.0823 | -0.0675 |
| F | 1.6354  | 1.0424  | 0.4886  |
| F | 2.0818  | -1.2058 | 0.7267  |
| F | 1.9326  | -0.2804 | -1.3692 |
| F | 3.7542  | 0.2228  | -0.0178 |
| H | 0.1729  | 0.5041  | 0.3377  |
| C | -1.5383 | 2.4123  | 0.0491  |
| H | -1.0810 | 2.7101  | 0.9996  |
| H | -0.8256 | 2.6677  | -0.7436 |
| H | -2.4532 | 2.9905  | -0.0978 |

---

[1-me-Py][BF<sub>4</sub>] b3lyp/6-31++g(d,p)-d3

|   |         |         |         |
|---|---------|---------|---------|
| C | -2.1618 | 0.8865  | -0.7671 |
| C | -2.9205 | -0.2344 | -1.0385 |
| C | -2.8219 | -1.3353 | -0.1975 |
| C | -1.9721 | -1.2817 | 0.9086  |
| C | -1.2361 | -0.1384 | 1.1447  |
| N | -1.3257 | 0.9144  | 0.3014  |
| C | -0.4413 | 2.0911  | 0.4865  |
| H | -2.1897 | 1.7854  | -1.3708 |
| H | -3.5649 | -0.2367 | -1.9096 |
| H | -3.4176 | -2.2208 | -0.3873 |
| H | -1.8595 | -2.1290 | 1.5743  |
| H | -0.4975 | -0.0555 | 1.9292  |
| H | -1.0363 | 3.0111  | 0.4140  |

|   |        |         |         |
|---|--------|---------|---------|
| H | 0.3346 | 2.0634  | -0.2794 |
| H | 0.0374 | 2.0124  | 1.4581  |
| B | 2.2159 | -0.2562 | -0.1655 |
| F | 2.7249 | 1.0326  | -0.3780 |
| F | 1.8217 | -0.3805 | 1.1915  |
| F | 1.0970 | -0.4665 | -1.0086 |
| F | 3.2137 | -1.2164 | -0.4639 |

---

Pyridine hf-6-31g(d)

|   |         |         |         |
|---|---------|---------|---------|
| C | 1.1441  | -0.7232 | 0       |
| C | 1.2000  | 0.6737  | 0.0000  |
| C | -0.0000 | 1.3869  | 0.0000  |
| C | -1.2001 | 0.6736  | 0.0000  |
| C | -1.1441 | -0.7232 | -0.0000 |
| N | 0.0000  | -1.4206 | 0.0000  |
| H | 2.0603  | -1.3112 | -0.0003 |
| H | 2.1595  | 1.1834  | 0.0001  |
| H | -0.0000 | 2.4740  | -0.0007 |
| H | -2.1596 | 1.1832  | 0.0001  |
| H | -2.0602 | -1.3113 | -0.0003 |

---

[Py][BF<sub>4</sub>] b3lyp/6-31++g(d,p)-d3

|   |         |         |         |
|---|---------|---------|---------|
| C | 1.4645  | -0.9982 | -0.0309 |
| C | 2.8058  | -1.3417 | 0.0037  |
| C | 3.7654  | -0.3261 | 0.0294  |
| C | 3.3655  | 1.0131  | 0.0194  |
| C | 2.0128  | 1.3085  | -0.0162 |
| N | 1.1155  | 0.3032  | -0.0400 |
| H | 0.6525  | -1.7133 | -0.0510 |
| H | 3.0882  | -2.3874 | 0.0114  |
| H | 4.8206  | -0.5769 | 0.0573  |
| H | 4.0877  | 1.8202  | 0.0386  |
| H | 1.6112  | 2.3137  | -0.0269 |
| H | 0.1155  | 0.5461  | -0.0675 |
| B | -2.5195 | -0.0119 | 0.0084  |
| F | -1.5926 | 1.0745  | -0.1132 |
| F | -3.2083 | 0.1103  | 1.2267  |
| F | -3.4195 | 0.0330  | -1.0689 |
| F | -1.7875 | -1.2177 | -0.0176 |
| C | 1.4645  | -0.9982 | -0.0309 |

|   |        |         |        |
|---|--------|---------|--------|
| C | 2.8058 | -1.3417 | 0.0037 |
| C | 3.7654 | -0.3261 | 0.0294 |

---

Pyrrole b3lyp/6-31++g(d,p)-d3

|   |         |         |         |
|---|---------|---------|---------|
| N | -1.1128 | 0.0000  | 0.0000  |
| C | -0.3260 | -1.1127 | 0.0000  |
| C | 0.9717  | -0.7133 | 0.0000  |
| C | 0.9718  | 0.7132  | 0.0000  |
| C | -0.3259 | 1.1127  | 0.0000  |
| H | -2.1053 | 0.0001  | 0.0001  |
| H | -0.7553 | -2.0929 | -0.0001 |
| H | 1.8281  | -1.3567 | 0.0000  |
| H | 1.8282  | 1.3566  | 0.0000  |
| H | -0.7552 | 2.0929  | 0.0000  |

---

[P16][DCA] b3lyp/6-31++g(d,p)-d3

|   |         |         |         |
|---|---------|---------|---------|
| N | 0.5274  | -0.2652 | -0.4861 |
| C | 0.6979  | 1.2435  | -0.6163 |
| C | 0.7614  | 1.7653  | 0.8101  |
| C | 1.5238  | 0.6475  | 1.5250  |
| C | 0.9004  | -0.6165 | 0.9513  |
| C | 1.4609  | -0.9468 | -1.4270 |
| C | -0.8746 | -0.7096 | -0.8138 |
| C | -1.9845 | 0.0158  | -0.0697 |
| H | -0.1122 | 1.6352  | -1.2353 |
| H | 1.6560  | 1.4110  | -1.1157 |
| H | 1.2851  | 2.7252  | 0.8451  |
| H | -0.2410 | 1.8887  | 1.2371  |
| H | 1.4214  | 0.6761  | 2.6135  |
| H | 2.5898  | 0.6978  | 1.2753  |
| H | 1.5717  | -1.4782 | 0.9315  |
| H | -0.0196 | -0.8785 | 1.4771  |
| H | 1.3106  | -2.0270 | -1.3523 |
| H | 2.4835  | -0.6869 | -1.1451 |
| H | 1.2522  | -0.5932 | -2.4405 |
| H | -0.9029 | -1.7843 | -0.5986 |
| H | -0.9908 | -0.5670 | -1.8945 |
| H | -1.9557 | 1.0906  | -0.2880 |
| H | -1.8744 | -0.1017 | 1.0157  |
| N | 5.2205  | -0.0787 | 0.2091  |

|   |         |         |         |
|---|---------|---------|---------|
| C | 4.5389  | -1.1457 | 0.5560  |
| N | 3.9808  | -2.1190 | 0.8946  |
| C | 4.5930  | 0.8696  | -0.4448 |
| N | 4.0811  | 1.7516  | -1.0229 |
| C | -3.3444 | -0.5395 | -0.4945 |
| C | -4.4996 | 0.1444  | 0.2308  |
| H | -3.3771 | -1.6211 | -0.2962 |
| H | -3.4677 | -0.4102 | -1.5801 |
| H | -4.3846 | -0.0024 | 1.3159  |
| H | -4.4482 | 1.2296  | 0.0524  |
| C | -5.8667 | -0.3734 | -0.2067 |
| C | -7.0144 | 0.3101  | 0.5298  |
| H | -5.9122 | -1.4590 | -0.0362 |
| H | -5.9791 | -0.2191 | -1.2899 |
| H | -7.9873 | -0.0691 | 0.1930  |
| H | -6.9413 | 0.1391  | 1.6126  |
| H | -6.9971 | 1.3951  | 0.3582  |

---

P12-DCA b3lyp/6-31++g(d,p)-d3

|   |         |         |         |
|---|---------|---------|---------|
| N | -1.1730 | -0.3689 | -0.3976 |
| C | -1.2522 | 1.1163  | -0.7198 |
| C | -1.3040 | 1.8276  | 0.6242  |
| C | -0.3833 | 0.9689  | 1.4921  |
| C | -0.6591 | -0.4656 | 1.0420  |
| C | -0.2111 | -1.0289 | -1.3365 |
| C | -2.4946 | -1.0675 | -0.5587 |
| C | -3.6781 | -0.4769 | 0.1954  |
| H | -2.0962 | 1.2875  | -1.3716 |
| H | -0.3393 | 1.3790  | -1.2304 |
| H | -0.9452 | 2.8433  | 0.5245  |
| H | -2.3106 | 1.8617  | 1.0248  |
| H | -0.5714 | 1.0825  | 2.5522  |
| H | 0.6467  | 1.2298  | 1.2986  |
| H | 0.2156  | -1.0960 | 1.0549  |
| H | -1.4341 | -0.9313 | 1.6295  |
| H | -0.1208 | -2.0721 | -1.0772 |
| H | 0.7454  | -0.5480 | -1.2510 |
| H | -0.5870 | -0.9180 | -2.3435 |
| H | -2.3276 | -2.0911 | -0.2518 |
| H | -2.7077 | -1.0711 | -1.6189 |

|   |         |         |         |
|---|---------|---------|---------|
| H | -4.5339 | -1.1150 | 0.0059  |
| H | -3.9321 | 0.5174  | -0.1472 |
| H | -3.5267 | -0.4466 | 1.2664  |
| N | 3.6133  | 0.0372  | 0.0180  |
| C | 2.9955  | -1.0443 | 0.4340  |
| N | 2.4487  | -1.9887 | 0.7983  |
| C | 2.8102  | 0.9190  | -0.5199 |
| N | 2.0945  | 1.6913  | -0.9877 |

---

[CMI][HSO<sub>4</sub>] b3lyp/6-31++g(d,p)-d3

|   |         |         |         |
|---|---------|---------|---------|
| C | -0.5983 | 0.9519  | 0.3828  |
| N | -0.5996 | 2.2850  | 0.3318  |
| C | -1.5192 | 2.6921  | -0.6212 |
| C | -2.0734 | 1.5650  | -1.1469 |
| N | -1.4880 | 0.4901  | -0.5020 |
| C | 0.3210  | 3.1346  | 1.0965  |
| C | -1.6204 | -0.9233 | -0.8394 |
| H | 0.0336  | 0.3362  | 1.0063  |
| H | -1.6885 | 3.7336  | -0.8425 |
| H | -2.8125 | 1.4341  | -1.9211 |
| H | 1.2755  | 2.6061  | 1.1576  |
| H | -0.0874 | 3.3347  | 2.0906  |
| H | 0.4508  | 4.0737  | 0.5567  |
| H | -2.3286 | -1.0247 | -1.6644 |
| H | -0.6321 | -1.2734 | -1.1703 |
| S | 2.2299  | -0.5021 | -0.2332 |
| O | 3.4563  | -1.2886 | -0.3839 |
| O | 1.3134  | -0.4352 | -1.3966 |
| O | 1.2533  | -1.4225 | 0.8407  |
| O | 2.3804  | 0.7924  | 0.4815  |
| H | 1.8591  | -1.7558 | 1.5259  |
| C | -2.0873 | -1.7367 | 0.3570  |
| O | -2.2277 | -1.3197 | 1.4817  |
| O | -2.3146 | -3.0080 | -0.0202 |
| H | -2.5568 | -3.5039 | 0.7847  |

---

[EMIM][HSO<sub>4</sub>] b3lyp/6-31++g(d,p)-d3

|   |        |        |         |
|---|--------|--------|---------|
| C | 1.1571 | 0.5098 | -0.7801 |
| N | 1.0751 | 1.7189 | -0.2139 |
| C | 1.6381 | 1.6572 | 1.0492  |

|   |         |         |         |
|---|---------|---------|---------|
| C | 2.0855  | 0.3806  | 1.2243  |
| N | 1.7776  | -0.3167 | 0.0686  |
| C | 0.3918  | 2.8802  | -0.7850 |
| C | 2.0953  | -1.7304 | -0.1955 |
| C | 3.5881  | -1.9437 | -0.4060 |
| H | 0.7954  | 0.2485  | -1.7615 |
| H | 1.6657  | 2.5166  | 1.7000  |
| H | 2.5842  | -0.0896 | 2.0565  |
| H | 0.1746  | 2.6768  | -1.8324 |
| H | 1.0438  | 3.7507  | -0.7051 |
| H | -0.5364 | 3.0603  | -0.2407 |
| H | 1.7276  | -2.3059 | 0.6566  |
| H | 1.5229  | -2.0195 | -1.0775 |
| H | 3.7744  | -3.0060 | -0.5894 |
| H | 3.9457  | -1.3736 | -1.2688 |
| H | 4.1578  | -1.6421 | 0.4780  |
| S | -2.2311 | -0.3397 | 0.1025  |
| O | -3.6132 | -0.7805 | 0.4344  |
| O | -1.4483 | 0.1496  | 1.2609  |
| O | -1.4009 | -1.7232 | -0.2979 |
| O | -2.1651 | 0.5331  | -1.1004 |
| H | -1.8419 | -2.1524 | -1.0542 |

---

ethanolamine formate m062x/aug-cc-pvdz

|   |         |         |         |
|---|---------|---------|---------|
| N | 0.3439  | 1.1173  | 0.2358  |
| H | -1.1439 | 0.8179  | -0.2512 |
| C | 2.6561  | 0.1774  | 0.2230  |
| C | 1.1987  | -0.0044 | -0.1787 |
| O | 3.4684  | -0.8946 | -0.2279 |
| H | 0.6762  | 1.9828  | -0.1885 |
| H | 3.0600  | 1.0849  | -0.2451 |
| H | 2.7306  | 0.2971  | 1.3166  |
| H | 0.7992  | -0.9237 | 0.2718  |
| H | 1.1268  | -0.1097 | -1.2680 |
| H | 3.1984  | -1.6992 | 0.2325  |
| C | -2.6229 | -0.3076 | 0.2550  |
| O | -3.7192 | -0.7987 | 0.1024  |
| O | -2.0818 | 0.5474  | -0.5862 |
| H | -1.9925 | -0.5509 | 1.1342  |
| H | 0.4078  | 1.2541  | 1.2441  |



---

| ethanolamine acetate m062x/aug-cc-pvdz |         |         |         |
|----------------------------------------|---------|---------|---------|
| N                                      | -0.9229 | -1.6381 | 0.2205  |
| C                                      | -1.7577 | 0.6546  | 0.1701  |
| C                                      | -2.0284 | -0.7818 | -0.2330 |
| O                                      | -2.8612 | 1.4331  | -0.2810 |
| H                                      | -1.1025 | -2.6030 | -0.0502 |
| H                                      | -0.8794 | -1.6326 | 1.2391  |
| H                                      | -1.6561 | 0.7209  | 1.2649  |
| H                                      | -0.8195 | 1.0068  | -0.2851 |
| H                                      | -2.0895 | -0.8479 | -1.3263 |
| H                                      | -2.9952 | -1.0969 | 0.1852  |
| H                                      | -2.7036 | 2.3506  | -0.0304 |
| C                                      | 1.9325  | 0.0828  | 0.1196  |
| C                                      | 3.1726  | 0.7308  | -0.4310 |
| O                                      | 1.5089  | 0.2814  | 1.2473  |
| O                                      | 1.3410  | -0.7264 | -0.7444 |
| H                                      | 3.6421  | 1.3551  | 0.3328  |
| H                                      | 3.8711  | -0.0433 | -0.7713 |
| H                                      | 2.9031  | 1.3414  | -1.3019 |
| H                                      | 0.4657  | -1.1068 | -0.3300 |

---

| 4ip ethanolamine formate m062x/aug-cc-pvdz |         |         |         |
|--------------------------------------------|---------|---------|---------|
| N                                          | -4.0004 | 1.3444  | 1.5533  |
| C                                          | -1.7194 | 0.6776  | 2.2356  |
| C                                          | -3.2165 | 0.4676  | 2.4430  |
| O                                          | -0.9678 | -0.2202 | 3.0385  |
| H                                          | -4.8686 | 1.6201  | 2.0064  |
| H                                          | -4.2665 | 0.8184  | 0.7194  |
| H                                          | -1.4633 | 0.5573  | 1.1702  |
| H                                          | -1.4437 | 1.6968  | 2.5283  |
| H                                          | -3.4611 | 0.6959  | 3.4841  |
| H                                          | -3.4615 | -0.5888 | 2.2673  |
| H                                          | -0.8505 | -1.0397 | 2.5183  |
| C                                          | -2.1213 | 2.8085  | -0.6450 |
| O                                          | -2.5821 | 1.8185  | -1.1971 |
| O                                          | -2.5325 | 3.2342  | 0.5356  |
| H                                          | -3.1820 | 2.5239  | 0.9575  |
| N                                          | -4.0301 | -3.3118 | 0.5079  |
| C                                          | -1.7921 | -2.3508 | 0.4029  |

|   |         |         |         |
|---|---------|---------|---------|
| C | -2.7292 | -3.2494 | 1.1892  |
| O | -0.5961 | -2.1977 | 1.1596  |
| H | -4.6988 | -3.8268 | 1.0774  |
| H | -3.9387 | -3.8263 | -0.3683 |
| H | -1.5710 | -2.7969 | -0.5760 |
| H | -2.2721 | -1.3751 | 0.2318  |
| H | -2.8838 | -2.8237 | 2.1861  |
| H | -2.2741 | -4.2393 | 1.3111  |
| H | 0.1242  | -1.9185 | 0.5613  |
| C | -4.7686 | -0.8724 | -1.5719 |
| O | -4.2207 | -1.7277 | -2.2498 |
| O | -4.9297 | -0.9877 | -0.2594 |
| H | -4.5674 | -1.9191 | 0.0674  |
| N | 1.6940  | 0.5705  | 1.7720  |
| C | 4.0955  | 0.4716  | 1.3614  |
| C | 2.9758  | 0.0914  | 2.3154  |
| O | 5.3128  | -0.1054 | 1.8052  |
| H | 0.9395  | 0.4127  | 2.4423  |
| H | 1.4718  | 0.0153  | 0.9425  |
| H | 3.8340  | 0.1220  | 0.3544  |
| H | 4.1852  | 1.5664  | 1.3074  |
| H | 3.1385  | 0.5542  | 3.2937  |
| H | 2.9777  | -0.9986 | 2.4520  |
| H | 5.8047  | -0.3654 | 1.0098  |
| C | 2.2489  | 2.9095  | -0.4406 |
| O | 2.4417  | 1.8560  | -1.0329 |
| O | 1.8389  | 2.9748  | 0.8123  |
| H | 1.7597  | 2.0010  | 1.2221  |
| N | 3.2184  | -3.2384 | -0.8700 |
| C | 4.9135  | -1.5621 | -1.3909 |
| C | 4.4936  | -2.6527 | -0.4230 |
| O | 6.0490  | -0.9119 | -0.8194 |
| H | 2.9842  | -4.0443 | -0.2913 |
| H | 3.3004  | -3.5841 | -1.8267 |
| H | 5.1740  | -2.0008 | -2.3627 |
| H | 4.0922  | -0.8496 | -1.5452 |
| H | 4.3354  | -2.2205 | 0.5711  |
| H | 5.2839  | -3.4071 | -0.3470 |
| H | 6.3731  | -0.2441 | -1.4390 |
| C | 1.1251  | -0.8404 | -1.7367 |

|   |         |         |         |
|---|---------|---------|---------|
| O | 1.7020  | -1.0745 | -2.7847 |
| O | 1.4214  | -1.4793 | -0.6051 |
| H | 2.1955  | -2.2565 | -0.7688 |
| H | -1.3553 | 3.4220  | -1.0714 |
| H | -5.1806 | 0.0325  | -1.9672 |
| H | 0.3112  | -0.1521 | -1.6423 |
| H | 2.4284  | 3.8652  | -0.8870 |

---

4IP ethanolamine acetate

m062x/aug-cc-pvdz

|   |        |         |         |
|---|--------|---------|---------|
| N | 4.0838 | 1.5346  | -1.7584 |
| C | 1.6800 | 1.0196  | -2.0614 |
| C | 3.0827 | 0.8924  | -2.6638 |
| O | 0.7708 | 0.1356  | -2.7511 |
| H | 4.8589 | 1.9241  | -2.2705 |
| H | 4.4324 | 0.8668  | -1.0792 |
| H | 1.7186 | 0.7886  | -1.0083 |
| H | 1.3221 | 2.0313  | -2.1754 |
| H | 3.1089 | 1.3762  | -3.6297 |
| H | 3.3107 | -0.1566 | -2.8089 |
| H | 0.7437 | -0.7160 | -2.2623 |
| C | 2.4488 | 2.8024  | 0.8898  |
| C | 1.8285 | 3.8387  | 1.7860  |
| O | 2.4532 | 1.6005  | 1.1317  |
| O | 2.9797 | 3.3266  | -0.1955 |
| H | 1.4469 | 3.3759  | 2.6816  |
| H | 2.5698 | 4.5882  | 2.0314  |
| H | 1.0289 | 4.3345  | 1.2490  |
| H | 3.4255 | 2.6521  | -0.8445 |
| N | 4.2076 | -3.1339 | -0.9679 |
| C | 2.0378 | -2.1396 | -0.3444 |
| C | 2.7760 | -3.0205 | -1.3514 |
| O | 0.7571 | -1.8425 | -0.9403 |
| H | 4.7485 | -3.6546 | -1.6383 |
| H | 4.3414 | -3.5091 | -0.0398 |
| H | 1.9145 | -2.6637 | 0.5961  |
| H | 2.5961 | -1.2358 | -0.1628 |
| H | 2.7230 | -2.5434 | -2.3188 |
| H | 2.2799 | -3.9817 | -1.4211 |
| H | 0.0872 | -1.5859 | -0.2727 |
| C | 5.1568 | -1.0141 | 1.2639  |

|   |         |         |         |
|---|---------|---------|---------|
| C | 5.3869  | 0.2472  | 2.0348  |
| O | 5.0317  | -2.1249 | 1.7315  |
| O | 5.0532  | -0.7887 | -0.0642 |
| H | 5.5943  | 0.0140  | 3.0668  |
| H | 6.2065  | 0.8010  | 1.5962  |
| H | 4.4873  | 0.8456  | 1.9574  |
| H | 4.8160  | -1.6421 | -0.5649 |
| N | -1.9266 | 0.5368  | -1.7439 |
| C | -4.3679 | 0.1409  | -1.8264 |
| C | -3.0032 | -0.2629 | -2.3996 |
| O | -5.2712 | -0.9805 | -1.9327 |
| H | -1.0603 | 0.5235  | -2.2737 |
| H | -1.7438 | 0.1646  | -0.8205 |
| H | -4.2393 | 0.4198  | -0.7938 |
| H | -4.7576 | 0.9991  | -2.3599 |
| H | -2.9629 | -0.0883 | -3.4649 |
| H | -2.8672 | -1.3224 | -2.2252 |
| H | -5.7874 | -1.0332 | -1.1104 |
| C | -3.1300 | 2.7999  | 0.2755  |
| C | -3.5241 | 4.1474  | 0.8233  |
| O | -3.2057 | 1.7613  | 0.9261  |
| O | -2.7078 | 2.8593  | -0.9647 |
| H | -3.8647 | 4.0494  | 1.8415  |
| H | -2.6735 | 4.8156  | 0.7714  |
| H | -4.3046 | 4.5679  | 0.2014  |
| H | -2.3755 | 1.9357  | -1.3732 |
| N | -2.9214 | -3.2437 | 0.8897  |
| C | -4.5563 | -1.4442 | 1.3118  |
| C | -4.2937 | -2.7543 | 0.5721  |
| O | -5.8300 | -0.9701 | 0.7897  |
| H | -2.6842 | -4.0677 | 0.3608  |
| H | -2.7958 | -3.4145 | 1.8773  |
| H | -4.6185 | -1.6072 | 2.3799  |
| H | -3.7825 | -0.7236 | 1.1097  |
| H | -4.3600 | -2.5571 | -0.4847 |
| H | -5.0563 | -3.4751 | 0.8418  |
| H | -6.0665 | -0.1229 | 1.1897  |
| C | -1.1349 | -0.9184 | 2.1899  |
| C | -0.4930 | 0.4139  | 2.3994  |
| O | -1.6266 | -1.6196 | 3.0442  |

|   |         |         |        |
|---|---------|---------|--------|
| O | -1.1920 | -1.2902 | 0.8778 |
| H | -0.3650 | 0.5810  | 3.4576 |
| H | 0.4564  | 0.5034  | 1.8901 |
| H | -1.1768 | 1.1518  | 1.9946 |
| H | -1.8449 | -2.0912 | 0.7564 |

---

4IP [C<sub>4</sub>mim]OH m062x/aug-cc-pvdz

|   |         |         |         |
|---|---------|---------|---------|
| C | -0.6543 | 1.7000  | 2.2680  |
| N | -1.9646 | 1.4274  | 2.2980  |
| C | -2.7548 | 2.5890  | 2.2957  |
| C | -1.7928 | 3.5795  | 2.2405  |
| N | -0.5196 | 3.0251  | 2.2245  |
| C | -2.5007 | 0.0758  | 2.3844  |
| C | 0.7531  | 3.7333  | 2.0693  |
| C | 1.0601  | 4.0017  | 0.6004  |
| C | 2.4693  | 4.5402  | 0.3850  |
| C | 2.7584  | 4.7654  | -1.0963 |
| H | 0.1737  | 0.9979  | 2.2753  |
| H | -4.5569 | 2.1555  | 1.9451  |
| H | -1.8961 | 4.6559  | 2.2094  |
| H | -3.2848 | -0.0496 | 1.6373  |
| H | -1.7030 | -0.6488 | 2.2102  |
| H | -2.9244 | -0.0890 | 3.3795  |
| H | 1.5300  | 3.1030  | 2.5116  |
| H | 0.6802  | 4.6628  | 2.6401  |
| H | 0.3172  | 4.6968  | 0.1859  |
| H | 0.9398  | 3.0595  | 0.0471  |
| H | 3.1888  | 3.8186  | 0.7943  |
| H | 2.6024  | 5.4747  | 0.9451  |
| H | 3.7988  | 5.0621  | -1.2664 |
| H | 2.1125  | 5.5496  | -1.5073 |
| H | 2.5737  | 3.8461  | -1.6660 |
| O | -5.4452 | 1.7754  | 1.6780  |
| H | -5.9968 | 1.8252  | 2.4677  |
| C | -4.1315 | -1.3907 | -1.1152 |
| N | -5.0642 | -1.9955 | -1.8958 |
| C | -5.6215 | -1.1304 | -2.8179 |
| C | -5.0213 | 0.0713  | -2.6189 |
| N | -4.1141 | -0.1156 | -1.5900 |
| C | -5.4214 | -3.4022 | -1.7963 |

|   |         |         |         |
|---|---------|---------|---------|
| C | -3.2801 | 0.9458  | -1.0255 |
| C | -2.5632 | 1.7778  | -2.0806 |
| C | -1.6715 | 2.8348  | -1.4273 |
| C | -0.7695 | 3.5330  | -2.4406 |
| H | -3.0787 | -2.3581 | 0.1752  |
| H | -6.3805 | -1.4404 | -3.5213 |
| H | -5.1663 | 1.0207  | -3.1119 |
| H | -6.4871 | -3.5051 | -1.5789 |
| H | -5.1917 | -3.9154 | -2.7333 |
| H | -4.8405 | -3.8460 | -0.9874 |
| H | -2.5430 | 0.4507  | -0.3852 |
| H | -3.9046 | 1.5817  | -0.3876 |
| H | -3.2879 | 2.2720  | -2.7381 |
| H | -1.9544 | 1.1141  | -2.7106 |
| H | -1.0625 | 2.3502  | -0.6495 |
| H | -2.2989 | 3.5754  | -0.9160 |
| H | -0.1856 | 4.3317  | -1.9733 |
| H | -1.3642 | 3.9763  | -3.2470 |
| H | -0.0667 | 2.8248  | -2.8970 |
| O | -2.5735 | -2.9073 | 0.8370  |
| H | -3.1801 | -3.0080 | 1.5813  |
| C | 2.5751  | -4.3980 | 0.6213  |
| N | 3.6776  | -3.9885 | -0.0154 |
| C | 3.8225  | -2.5933 | 0.0173  |
| C | 2.7020  | -2.2119 | 0.7304  |
| N | 1.9506  | -3.3214 | 1.0885  |
| C | 4.6177  | -4.9032 | -0.6536 |
| C | 0.6837  | -3.3226 | 1.8285  |
| C | 0.7226  | -2.3563 | 3.0065  |
| C | -0.4961 | -2.5294 | 3.9093  |
| C | -0.5644 | -1.4517 | 4.9860  |
| H | 2.2391  | -5.4179 | 0.7426  |
| H | 4.9403  | -1.7113 | -1.2087 |
| H | 2.3607  | -1.2226 | 1.0012  |
| H | 5.3680  | -4.2999 | -1.1631 |
| H | 5.1035  | -5.5342 | 0.0940  |
| H | 4.0994  | -5.5312 | -1.3811 |
| H | 0.5134  | -4.3481 | 2.1700  |
| H | -0.1314 | -3.0572 | 1.1468  |
| H | 0.7569  | -1.3232 | 2.6322  |

|   |         |         |         |
|---|---------|---------|---------|
| H | 1.6432  | -2.5186 | 3.5825  |
| H | -0.4637 | -3.5230 | 4.3742  |
| H | -1.4013 | -2.5016 | 3.2908  |
| H | -1.4470 | -1.5730 | 5.6220  |
| H | -0.6098 | -0.4530 | 4.5345  |
| H | 0.3225  | -1.4836 | 5.6290  |
| O | 5.4676  | -1.2569 | -1.9319 |
| H | 4.8612  | -0.5922 | -2.2843 |
| C | 2.9909  | 1.0920  | -0.5109 |
| N | 4.0707  | 1.6155  | -1.1463 |
| C | 3.9269  | 1.6100  | -2.5216 |
| C | 2.7084  | 1.0615  | -2.7720 |
| N | 2.1641  | 0.7543  | -1.5387 |
| C | 5.2659  | 2.0910  | -0.4686 |
| C | 0.8417  | 0.1627  | -1.3569 |
| C | 0.6853  | -1.2086 | -2.0021 |
| C | -0.7164 | -1.7510 | -1.7324 |
| C | -0.9162 | -3.1741 | -2.2392 |
| H | 2.6281  | 0.9925  | 1.3156  |
| H | 4.6864  | 1.9943  | -3.1871 |
| H | 2.1904  | 0.8751  | -3.7015 |
| H | 5.5070  | 3.1027  | -0.8042 |
| H | 5.0722  | 2.0983  | 0.6042  |
| H | 6.1062  | 1.4248  | -0.6819 |
| H | 0.0966  | 0.8480  | -1.7756 |
| H | 0.6760  | 0.1010  | -0.2754 |
| H | 1.4429  | -1.8924 | -1.6016 |
| H | 0.8513  | -1.1310 | -3.0844 |
| H | -1.4545 | -1.0864 | -2.2007 |
| H | -0.9198 | -1.7182 | -0.6522 |
| H | -1.9416 | -3.5144 | -2.0620 |
| H | -0.2404 | -3.8706 | -1.7289 |
| H | -0.7151 | -3.2392 | -3.3147 |
| O | 2.3760  | 0.9302  | 2.2872  |
| H | 3.0460  | 0.3732  | 2.7021  |

---

4IP [C<sub>4</sub>mim][BF<sub>4</sub>] mp2/aug-cc-pvdz

|   |         |         |        |
|---|---------|---------|--------|
| C | -5.5231 | -1.8890 | 1.2827 |
| N | -4.9621 | -1.2354 | 2.3041 |
| C | -4.9609 | 0.1183  | 2.0134 |

|   |         |         |         |
|---|---------|---------|---------|
| C | -5.5446 | 0.2649  | 0.7938  |
| N | -5.8898 | -1.0008 | 0.3552  |
| C | -4.3318 | -1.8914 | 3.4505  |
| C | -6.3866 | -1.3478 | -0.9887 |
| C | -5.3212 | -1.1341 | -2.0683 |
| C | -5.8655 | -1.4761 | -3.4611 |
| C | -4.8147 | -1.2827 | -4.5591 |
| H | -5.6090 | -2.9623 | 1.2148  |
| H | -4.4867 | 0.8486  | 2.6478  |
| H | -5.6364 | 1.1358  | 0.1651  |
| H | -3.2907 | -1.5684 | 3.5111  |
| H | -4.8630 | -1.6302 | 4.3697  |
| H | -4.3538 | -2.9668 | 3.2766  |
| H | -7.2795 | -0.7414 | -1.1760 |
| H | -6.6841 | -2.3981 | -0.9481 |
| H | -4.4680 | -1.7760 | -1.8277 |
| H | -4.9672 | -0.0978 | -2.0402 |
| H | -6.7434 | -0.8507 | -3.6812 |
| H | -6.2166 | -2.5175 | -3.4716 |
| H | -5.2211 | -1.5329 | -5.5456 |
| H | -3.9420 | -1.9220 | -4.3830 |
| H | -4.4646 | -0.2442 | -4.5917 |
| B | -3.6113 | -4.2847 | 0.6269  |
| F | -4.4977 | -4.6092 | 1.6884  |
| F | -2.7911 | -5.3609 | 0.3126  |
| F | -4.3767 | -3.8846 | -0.4852 |
| F | -2.8200 | -3.1796 | 1.0578  |
| C | -0.4863 | 3.9035  | 0.9711  |
| N | 0.0584  | 3.9684  | 2.1893  |
| C | -0.2560 | 5.1929  | 2.7515  |
| C | -1.0151 | 5.8650  | 1.8434  |
| N | -1.1463 | 5.0422  | 0.7376  |
| C | 0.9190  | 2.9437  | 2.7848  |
| C | -1.9559 | 5.3187  | -0.4651 |
| C | -3.4543 | 5.3653  | -0.1492 |
| C | -4.2950 | 5.4493  | -1.4294 |
| C | -5.7980 | 5.4447  | -1.1376 |
| H | -0.4006 | 3.0750  | 0.2841  |
| H | 0.0904  | 5.4743  | 3.7333  |
| H | -1.4683 | 6.8424  | 1.8850  |



|   |         |         |         |
|---|---------|---------|---------|
| H | 0.5640  | 2.7223  | 3.7941  |
| H | 0.8769  | 2.0552  | 2.1583  |
| H | 1.9492  | 3.3009  | 2.7988  |
| H | -1.7457 | 4.5086  | -1.1636 |
| H | -1.5980 | 6.2606  | -0.8946 |
| H | -3.6755 | 6.2218  | 0.5043  |
| H | -3.7102 | 4.4528  | 0.3975  |
| H | -4.0532 | 4.5857  | -2.0585 |
| H | -4.0270 | 6.3532  | -1.9957 |
| H | -6.3802 | 5.5269  | -2.0622 |
| H | -6.0875 | 6.2782  | -0.4851 |
| H | -6.0848 | 4.5097  | -0.6436 |
| B | -2.9410 | 1.7614  | -0.4672 |
| F | -1.8154 | 2.2754  | -1.1682 |
| F | -2.8937 | 0.3671  | -0.4720 |
| F | -2.9105 | 2.2504  | 0.8605  |
| F | -4.1237 | 2.2112  | -1.0955 |
| C | 1.2401  | -2.2924 | -1.6006 |
| N | 0.9935  | -1.0187 | -1.9269 |
| C | -0.2271 | -0.6469 | -1.3907 |
| C | -0.7244 | -1.7342 | -0.7364 |
| N | 0.2088  | -2.7509 | -0.8807 |
| C | 1.8662  | -0.1613 | -2.7314 |
| C | 0.1228  | -4.1007 | -0.2953 |
| C | 0.3550  | -4.0983 | 1.2182  |
| C | 0.2669  | -5.5181 | 1.7944  |
| C | 0.4853  | -5.5514 | 3.3101  |
| H | 2.1399  | -2.8427 | -1.8486 |
| H | -0.6262 | 0.3488  | -1.5008 |
| H | -1.6418 | -1.8806 | -0.1878 |
| H | 2.0311  | 0.7744  | -2.1990 |
| H | 2.8213  | -0.6623 | -2.8836 |
| H | 1.3857  | 0.0346  | -3.6947 |
| H | 0.8744  | -4.7096 | -0.8065 |
| H | -0.8664 | -4.5056 | -0.5172 |
| H | -0.4147 | -3.4728 | 1.6838  |
| H | 1.3344  | -3.6519 | 1.4382  |
| H | 1.0127  | -6.1610 | 1.3046  |
| H | -0.7191 | -5.9292 | 1.5501  |
| H | 0.4156  | -6.5738 | 3.6985  |

|   |         |         |         |
|---|---------|---------|---------|
| H | -0.2683 | -4.9467 | 3.8293  |
| H | 1.4733  | -5.1576 | 3.5807  |
| B | 2.6153  | 2.5368  | -0.0436 |
| F | 2.3796  | 3.8691  | 0.2994  |
| F | 3.2442  | 2.4511  | -1.3065 |
| F | 3.4508  | 1.9286  | 0.9201  |
| F | 1.3854  | 1.8364  | -0.0937 |
| C | 5.7620  | 0.6902  | -0.7326 |
| N | 6.3962  | 0.9902  | -1.8694 |
| C | 7.6401  | 0.3867  | -1.8562 |
| C | 7.7458  | -0.2747 | -0.6721 |
| N | 6.5691  | -0.0658 | 0.0177  |
| C | 5.7746  | 1.6442  | -3.0212 |
| C | 6.1775  | -0.6946 | 1.2926  |
| C | 6.0084  | 0.3246  | 2.4217  |
| C | 5.6247  | -0.3578 | 3.7415  |
| C | 5.4258  | 0.6424  | 4.8847  |
| H | 4.7659  | 1.0075  | -0.4641 |
| H | 8.3202  | 0.4641  | -2.6891 |
| H | 8.5348  | -0.8914 | -0.2738 |
| H | 6.5005  | 2.3111  | -3.4916 |
| H | 5.4544  | 0.8668  | -3.7184 |
| H | 4.9128  | 2.2107  | -2.6707 |
| H | 6.9570  | -1.4252 | 1.5239  |
| H | 5.2556  | -1.2421 | 1.0884  |
| H | 5.2313  | 1.0443  | 2.1404  |
| H | 6.9436  | 0.8873  | 2.5516  |
| H | 6.4001  | -1.0852 | 4.0212  |
| H | 4.7017  | -0.9345 | 3.5940  |
| H | 5.1467  | 0.1332  | 5.8140  |
| H | 4.6338  | 1.3614  | 4.6439  |
| H | 6.3429  | 1.2121  | 5.0785  |
| B | 4.7543  | -2.2896 | -1.7018 |
| F | 4.9766  | -1.4086 | -2.7900 |
| F | 3.9866  | -1.5845 | -0.7296 |
| F | 4.0100  | -3.3984 | -2.1394 |
| F | 5.9644  | -2.6824 | -1.1343 |

---

8IP [C<sub>2</sub>mim][BF<sub>4</sub>] mp2/aug-cc-pvdz

|   |        |         |         |
|---|--------|---------|---------|
| N | 0.7977 | -0.5024 | -0.0619 |
|---|--------|---------|---------|

|   |         |         |         |
|---|---------|---------|---------|
| C | -0.2289 | -1.3338 | -0.2268 |
| N | -1.1649 | -0.7178 | -0.9434 |
| C | -0.7271 | 0.5533  | -1.2460 |
| C | 0.5123  | 0.6903  | -0.6937 |
| C | -2.4763 | -1.2868 | -1.2655 |
| C | -2.6981 | -1.3801 | -2.7649 |
| C | 1.9802  | -0.8002 | 0.7410  |
| H | -0.3117 | -2.3274 | 0.1989  |
| H | -1.3544 | 1.2621  | -1.7734 |
| H | 1.2027  | 1.5276  | -0.6723 |
| H | 1.7238  | -0.7603 | 1.8046  |
| H | 2.3212  | -1.8133 | 0.5000  |
| H | 2.7645  | -0.0762 | 0.4984  |
| H | -3.2210 | -0.6315 | -0.7970 |
| H | -2.4953 | -2.2777 | -0.7939 |
| H | -3.7111 | -1.7672 | -2.9499 |
| H | -2.6320 | -0.3915 | -3.2438 |
| H | -1.9712 | -2.0678 | -3.2169 |
| B | -0.4393 | -4.5007 | -0.9490 |
| F | -0.4886 | -5.8783 | -1.1536 |
| F | -1.3316 | -4.1352 | 0.0997  |
| F | -0.7811 | -3.7844 | -2.1083 |
| F | 0.8740  | -4.1149 | -0.5518 |
| N | 1.9469  | -4.8008 | 2.0795  |
| C | 0.6393  | -5.0142 | 2.2135  |
| N | 0.3314  | -6.1638 | 1.6111  |
| C | 1.4707  | -6.6835 | 1.0449  |
| C | 2.4899  | -5.8293 | 1.3440  |
| C | -1.0166 | -6.7503 | 1.5603  |
| C | -1.6168 | -6.8773 | 2.9507  |
| C | 2.6841  | -3.6659 | 2.6349  |
| H | -0.0683 | -4.3492 | 2.7031  |
| H | 1.4502  | -7.5916 | 0.4549  |
| H | 3.5443  | -5.8525 | 1.0923  |
| H | 3.4465  | -3.3399 | 1.9195  |
| H | 1.9732  | -2.8576 | 2.8311  |
| H | 3.1794  | -3.9693 | 3.5663  |
| H | -0.8999 | -7.7250 | 1.0711  |
| H | -1.6215 | -6.1107 | 0.9102  |
| H | -2.6001 | -7.3615 | 2.8741  |

|   |         |         |         |
|---|---------|---------|---------|
| H | -0.9804 | -7.4871 | 3.6078  |
| H | -1.7657 | -5.8864 | 3.4020  |
| B | -1.5133 | -2.2043 | 2.7954  |
| F | -1.8213 | -1.3834 | 3.8808  |
| F | -2.1609 | -1.7383 | 1.6330  |
| F | -1.9163 | -3.5390 | 3.0496  |
| F | -0.1092 | -2.1906 | 2.5597  |
| N | 2.6393  | -0.1660 | -2.9468 |
| C | 3.4536  | -0.8233 | -2.1256 |
| N | 2.9899  | -2.0617 | -1.9698 |
| C | 1.8321  | -2.2056 | -2.7069 |
| C | 1.6139  | -1.0096 | -3.3230 |
| C | 3.7188  | -3.1237 | -1.2646 |
| C | 4.3288  | -4.0940 | -2.2638 |
| C | 2.8437  | 1.2053  | -3.3874 |
| H | 4.3525  | -0.4266 | -1.6609 |
| H | 1.2457  | -3.1187 | -2.6987 |
| H | 0.8163  | -0.6845 | -3.9808 |
| H | 3.8449  | 1.5153  | -3.0757 |
| H | 2.7702  | 1.2355  | -4.4811 |
| H | 2.0960  | 1.8647  | -2.9298 |
| H | 2.9974  | -3.6225 | -0.6034 |
| H | 4.4922  | -2.6210 | -0.6731 |
| H | 4.9628  | -4.8154 | -1.7290 |
| H | 3.5471  | -4.6500 | -2.8021 |
| H | 4.9467  | -3.5378 | -2.9806 |
| B | 6.2726  | -0.9033 | -3.2300 |
| F | 7.5537  | -0.9709 | -3.7850 |
| F | 6.2465  | -1.6588 | -2.0168 |
| F | 5.2997  | -1.4107 | -4.0957 |
| F | 5.9543  | 0.4463  | -2.8960 |
| N | 7.3512  | 1.7043  | -0.8621 |
| C | 7.5616  | 0.4524  | -0.4657 |
| N | 8.5591  | -0.0601 | -1.1827 |
| C | 8.9854  | 0.8879  | -2.0850 |
| C | 8.2272  | 1.9991  | -1.8812 |
| C | 9.0251  | -1.4531 | -1.1243 |
| C | 8.4478  | -2.1902 | 0.0681  |
| C | 6.2459  | 2.5354  | -0.3997 |
| H | 7.0045  | -0.0505 | 0.3189  |

|   |          |           |            |
|---|----------|-----------|------------|
| H | 9.7522   | 0.6715    | -2.8185    |
| H | 8.2079   | 2.9524    | -2.3952    |
| H | 5.6550   | 2.8565    | -1.2654    |
| H | 5.6054   | 1.9210    | 0.2411     |
| H | 6.6250   | 3.4060    | 0.1487     |
| H | 10.1230  | 1 -1.4157 | 6 -1.08435 |
| H | 8.7077   | -1.9138   | -2.0684    |
| H | 8.8617   | -3.2069   | 0.0851     |
| H | 8.7007   | -1.6980   | 1.0182     |
| H | 7.3556   | -2.2663   | -0.0107    |
| B | 5.2059   | -1.2172   | 1.6853     |
| F | 4.1188   | -1.0710   | 2.5712     |
| F | 5.3962   | -2.5806   | 1.3898     |
| F | 6.3695   | -0.6529   | 2.2238     |
| F | 4.9138   | -0.5258   | 0.4708     |
| N | -8.6937  | 2.6639    | -0.1506    |
| C | -7.6010  | 2.2682    | -0.7977    |
| N | -7.7352  | 2.5683    | -2.0847    |
| C | -8.9629  | 3.1637    | -2.2752    |
| C | -9.5697  | 3.2167    | -1.0570    |
| C | -6.7438  | 2.2446    | -3.1157    |
| C | -6.1003  | 3.4990    | -3.6805    |
| C | -8.9734  | 2.3508    | 1.2450     |
| H | -6.7678  | 1.7368    | -0.3509    |
| H | -9.3011  | 3.4872    | -3.2526    |
| H | -10.5456 | 6 3.5824  | 4 -0.7615  |
| H | -9.5755  | 1.4355    | 1.2785     |
| H | -8.0178  | 2.1811    | 1.7518     |
| H | -9.4982  | 3.1980    | 1.7013     |
| H | -7.2658  | 1.6536    | -3.8802    |
| H | -6.0065  | 1.5982    | -2.6261    |
| H | -5.3750  | 3.2154    | -4.4556    |
| H | -6.8438  | 4.1681    | -4.1387    |
| H | -5.5658  | 4.0301    | -2.8828    |
| B | -4.3690  | 1.8818    | -0.2064    |
| F | -3.0342  | 1.5753    | 0.1030     |
| F | -4.9516  | 0.7500    | -0.8656    |
| F | -4.4410  | 2.9749    | -1.0870    |
| F | -5.1078  | 2.1372    | 0.9589     |
| N | -4.9349  | -1.9817   | 0.8272     |

|   |         |         |         |
|---|---------|---------|---------|
| C | -5.6534 | -1.9238 | -0.2915 |
| N | -5.5846 | -3.1023 | -0.9077 |
| C | -4.7866 | -3.9448 | -0.1576 |
| C | -4.3734 | -3.2370 | 0.9321  |
| C | -6.3357 | -3.4319 | -2.1238 |
| C | -7.3705 | -4.5133 | -1.8595 |
| C | -4.7732 | -0.8448 | 1.7362  |
| H | -6.1794 | -1.0496 | -0.6595 |
| H | -4.5598 | -4.9578 | -0.4689 |
| H | -3.6966 | -3.5008 | 1.7389  |
| H | -3.9399 | -0.2183 | 1.3986  |
| H | -5.7065 | -0.2731 | 1.7222  |
| H | -4.5528 | -1.2302 | 2.7370  |
| H | -5.6100 | -3.7384 | -2.8911 |
| H | -6.8227 | -2.4978 | -2.4345 |
| H | -7.9141 | -4.7290 | -2.7893 |
| H | -6.8996 | -5.4454 | -1.5147 |
| H | -8.0876 | -4.1568 | -1.1100 |
| B | -8.5119 | -0.5977 | -0.7504 |
| F | -9.6970 | 0.1228  | -0.8741 |
| F | -7.6485 | -0.3030 | -1.8560 |
| F | -8.7072 | -1.9784 | -0.7082 |
| F | -7.8385 | -0.1777 | 0.4393  |
| N | 2.1834  | 6.5287  | 0.4101  |
| C | 0.8915  | 6.3065  | 0.6330  |
| N | 0.2959  | 6.0419  | -0.5284 |
| C | 1.2444  | 6.0813  | -1.5269 |
| C | 2.4326  | 6.3844  | -0.9358 |
| C | -1.0944 | 5.5894  | -0.6612 |
| C | -1.1727 | 4.0902  | -0.8957 |
| C | 3.1657  | 6.7918  | 1.4570  |
| H | 0.4133  | 6.3375  | 1.6094  |
| H | 1.0090  | 5.8439  | -2.5575 |
| H | 3.4315  | 6.4579  | -1.3479 |
| H | 2.6334  | 6.8144  | 2.4137  |
| H | 3.8765  | 5.9595  | 1.4642  |
| H | 3.6623  | 7.7487  | 1.2543  |
| H | -1.5517 | 6.1646  | -1.4784 |
| H | -1.5973 | 5.8583  | 0.2759  |
| H | -2.2242 | 3.7785  | -0.9662 |

|   |         |         |         |
|---|---------|---------|---------|
| H | -0.6428 | 3.8119  | -1.8198 |
| H | -0.6956 | 3.5773  | -0.0515 |
| B | 3.1225  | 3.3402  | -0.6451 |
| F | 3.3598  | 1.9491  | -0.4857 |
| F | 1.7497  | 3.5602  | -0.3660 |
| F | 3.4255  | 3.7334  | -1.9536 |
| F | 3.9206  | 4.0667  | 0.2604  |
| N | 2.4246  | 1.5098  | 3.0055  |
| C | 1.3663  | 1.8522  | 2.2739  |
| N | 0.3007  | 1.1970  | 2.7306  |
| C | 0.6822  | 0.4201  | 3.8019  |
| C | 2.0222  | 0.6143  | 3.9694  |
| C | -1.0612 | 1.3317  | 2.1921  |
| C | -2.0332 | 1.8324  | 3.2442  |
| C | 3.7682  | 2.0488  | 2.8394  |
| H | 1.3693  | 2.5889  | 1.4726  |
| H | -0.0291 | -0.2220 | 4.3108  |
| H | 2.7295  | 0.1760  | 4.6629  |
| H | 3.7771  | 2.6732  | 1.9408  |
| H | 4.0052  | 2.6736  | 3.7090  |
| H | 4.4724  | 1.2131  | 2.7482  |
| H | -1.3648 | 0.3533  | 1.7926  |
| H | -0.9910 | 2.0412  | 1.3627  |
| H | -2.9999 | 2.0184  | 2.7545  |
| H | -2.1775 | 1.0789  | 4.0306  |
| H | -1.6553 | 2.7667  | 3.6795  |
| B | 0.7779  | 4.5925  | 3.2089  |
| F | 0.5855  | 5.9518  | 3.5440  |
| F | -0.1779 | 4.2459  | 2.2006  |
| F | 0.6364  | 3.7521  | 4.3000  |
| F | 2.0730  | 4.4659  | 2.6397  |

---

[NH<sub>2</sub>-Emim][BF<sub>4</sub>] m062x/aug-cc-pvdz

|   |         |         |         |
|---|---------|---------|---------|
| C | -0.3232 | -1.2378 | 0.8721  |
| N | 0.7456  | -1.7149 | 0.2415  |
| C | 0.4317  | -1.9024 | -1.0838 |
| C | -0.8707 | -1.5316 | -1.2390 |
| N | -1.3220 | -1.1297 | -0.0027 |
| C | 2.0373  | -2.0069 | 0.8566  |
| C | -2.6432 | -0.5667 | 0.2792  |

|   |         |         |         |
|---|---------|---------|---------|
| C | -2.7016 | 0.9188  | -0.0591 |
| N | -4.0575 | 1.3920  | 0.2137  |
| H | -0.3675 | -0.9673 | 1.9191  |
| H | 1.1573  | -2.2749 | -1.7950 |
| H | -1.5083 | -1.5165 | -2.1135 |
| H | 2.8056  | -1.4182 | 0.3509  |
| H | 1.9903  | -1.7208 | 1.9089  |
| H | 2.2394  | -3.0782 | 0.7643  |
| H | -2.8501 | -0.7327 | 1.3423  |
| H | -3.3755 | -1.1244 | -0.3125 |
| H | -2.4910 | 1.0510  | -1.1271 |
| H | -1.9157 | 1.4473  | 0.4994  |
| H | -4.1970 | 1.4874  | 1.2177  |
| B | 1.6982  | 1.3398  | -0.0854 |
| F | 2.5566  | 0.5214  | -0.8545 |
| F | 2.1240  | 2.6762  | -0.1551 |
| F | 0.3819  | 1.2273  | -0.5835 |
| F | 1.7216  | 0.9032  | 1.2624  |
| H | -4.1794 | 2.3230  | -0.1756 |

---

[NH<sub>2</sub>-Emim][BF<sub>4</sub>]-SO<sub>2</sub>

m062x/aug-cc-pvdz

|   |         |         |         |
|---|---------|---------|---------|
| C | -2.7383 | -0.8225 | -0.7413 |
| N | -3.6835 | -0.9922 | 0.1786  |
| C | -3.2075 | -1.8405 | 1.1514  |
| C | -1.9399 | -2.1872 | 0.7893  |
| N | -1.6724 | -1.5402 | -0.3961 |
| C | -4.9660 | -0.2976 | 0.2119  |
| C | -0.3917 | -1.5408 | -1.1070 |
| C | 0.7353  | -1.0678 | -0.1942 |
| N | 1.9226  | -0.8623 | -1.0202 |
| H | -2.8052 | -0.1716 | -1.6025 |
| H | -3.8041 | -2.1173 | 2.0111  |
| H | -1.2162 | -2.8334 | 1.2689  |
| H | -4.9314 | 0.4768  | 0.9837  |
| H | -5.1382 | 0.1620  | -0.7631 |
| H | -5.7545 | -1.0231 | 0.4288  |
| H | -0.5027 | -0.8529 | -1.9506 |
| H | -0.1963 | -2.5498 | -1.4851 |
| H | 0.9583  | -1.8447 | 0.5475  |
| H | 0.3974  | -0.1680 | 0.3380  |



|   |         |         |         |
|---|---------|---------|---------|
| H | 1.8121  | -0.0020 | -1.5544 |
| B | -1.7611 | 1.9717  | 0.0509  |
| F | -3.0877 | 2.0435  | -0.4369 |
| F | -1.3200 | 3.2460  | 0.4343  |
| F | -1.7230 | 1.0933  | 1.1565  |
| F | -0.9271 | 1.4629  | -0.9764 |
| S | 5.8694  | 0.2617  | -0.0542 |
| O | 7.1746  | 0.2317  | 0.6093  |
| O | 4.8182  | -0.5701 | 0.5434  |
| H | 2.7359  | -0.7256 | -0.4263 |

## --Effects of long alkyl chains on the prediction

Holbrey and Seddon (*J. Chem. Soc., Dalton Trans.* 1999, 2133–2140) studied a series of 1-alkyl-3-methylimidazolium ( $[C_n\text{mim}][\text{BF}_4]$  with  $n = 0–18$ ) in deuterated propanone and found that the NMR peaks of protons changed only slightly, indicating that the proton chemical shifts were relatively insensitive to increasing alkyl chain length.

However, the effects of long alkyl chain on the prediction of the calculated proton chemical shifts is still ambiguous. Therefore, we set out to calculate  $^1\text{H}$  NMR chemical shifts of a series of 1-alkyl-3-methylimidazolium ( $[C_n\text{mim}][\text{BF}_4]$  with  $n = 6, 8, 12$ ) ILs by means of RRS method. In the study,  $[C_4\text{mim}][\text{BF}_4]$ , the ionic liquids with relatively short alkyl chain, was used as the relative reference standard due to its structural similarity. It is found that the length of alkyl chains in the imidazolium ring has little effect on the accuracy of calculated chemical shifts. The RMS of  $[C_{12}\text{mim}][\text{BF}_4]$  ionic liquid is less than 0.25 ppm.

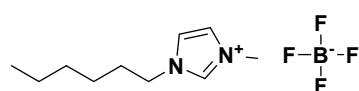

1-hexyl-3-methylimidazolium Tetrafluoroborate  
 $[C_6\text{mim}][\text{BF}_4]$

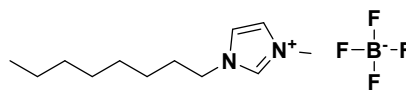

1-octyl-3-methylimidazolium Tetrafluoroborate  
 $[C_8\text{mim}][\text{BF}_4]$

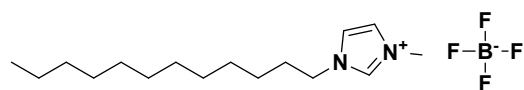

1-Dodecyl-3-methylimidazolium Tetrafluoroborate  
 $[C_{12}\text{mim}][\text{BF}_4]$

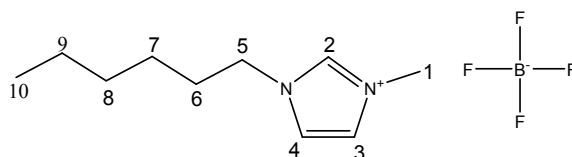

**Scheme S3. Structure of [C<sub>6</sub>mim][BF<sub>4</sub>] and Hydrogen Atoms Numbered.**

**Table S32. Calculated <sup>1</sup>H NMR Chemical Shifts of [C<sub>6</sub>mim][BF<sub>4</sub>]**

| H                                                          | $\sigma_{\text{cal}}$ | $\sigma_{\text{ref}}$ | $\delta_{\text{ref}}$ | $\delta_{\text{cal}}$ (RRS) | $\delta_{\text{cal}}$ (TMS) | $\delta_{\text{exp}}$ | AE (RRS) | AE (TMS) |
|------------------------------------------------------------|-----------------------|-----------------------|-----------------------|-----------------------------|-----------------------------|-----------------------|----------|----------|
| H2                                                         | 23.618                | 23.611                | 8.550                 | 8.543                       | 9.632                       | 8.670                 | 0.127    | 0.962    |
| H3                                                         | 26.186                | 26.134                | 7.350                 | 7.298                       | 7.064                       | 7.420                 | 0.122    | 0.356    |
| H4                                                         | 26.173                | 26.146                | 7.410                 | 7.383                       | 7.077                       | 7.470                 | 0.087    | 0.393    |
| H1                                                         | 29.318                | 29.297                | 4.140                 | 4.119                       | 3.932                       | 4.040                 | 0.079    | 0.108    |
| H5                                                         | 29.188                | 29.007                | 3.840                 | 3.660                       | 4.062                       | 4.180                 | 0.520    | 0.118    |
| H6                                                         | 31.877                | 31.979                | 1.410                 | 1.512                       | 1.373                       | 1.840                 | 0.328    | 0.467    |
| H7                                                         | 32.200                | 31.979                | 1.410                 | 1.189                       | 1.050                       | 1.840                 | 0.651    | 0.790    |
| H8                                                         | 32.290                | 31.979                | 1.410                 | 1.098                       | 0.959                       | 1.840                 | 0.742    | 0.881    |
| H9                                                         | 32.202                | 31.979                | 1.410                 | 1.187                       | 1.048                       | 1.840                 | 0.653    | 0.792    |
| H10                                                        | 32.462                | 31.979                | 1.410                 | 0.927                       | 0.788                       | 0.850                 | 0.077    | 0.062    |
| reference compound: [C <sub>4</sub> mim][BF <sub>4</sub> ] |                       |                       |                       |                             | RMS, ppm                    |                       | 0.428    | 0.590    |
| level of theory: HF/6-311++g(d,p)                          |                       |                       |                       |                             | MAE, ppm                    |                       | 0.339    | 0.493    |

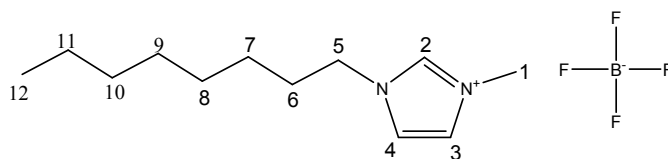

**Scheme S4. Structure of [C<sub>8</sub>mim][BF<sub>4</sub>] and Hydrogen Atoms Numbered.**

**Table S33. Calculated <sup>1</sup>H NMR Chemical Shifts of [C<sub>8</sub>mim][BF<sub>4</sub>]**

| H                                                          | $\sigma_{\text{cal}}$ | $\sigma_{\text{ref}}$ | $\delta_{\text{ref}}$ | $\delta_{\text{cal}}$ (RRS) | $\delta_{\text{cal}}$ (TMS) | $\delta_{\text{exp}}$ | AE (RRS) | AE (TMS) |
|------------------------------------------------------------|-----------------------|-----------------------|-----------------------|-----------------------------|-----------------------------|-----------------------|----------|----------|
| H2                                                         | 23.621                | 23.611                | 8.770                 | 8.760                       | 9.629                       | 8.430                 | 0.330    | 1.199    |
| H3                                                         | 26.191                | 26.173                | 7.630                 | 7.612                       | 7.059                       | 7.280                 | 0.332    | 0.221    |
| H4                                                         | 26.183                | 26.161                | 7.690                 | 7.668                       | 7.067                       | 7.280                 | 0.388    | 0.213    |
| H1                                                         | 29.320                | 29.315                | 4.040                 | 4.035                       | 3.930                       | 3.880                 | 0.155    | 0.050    |
| H5                                                         | 29.193                | 29.180                | 4.320                 | 4.307                       | 4.057                       | 4.090                 | 0.217    | 0.033    |
| H6                                                         | 31.887                | 31.880                | 1.930                 | 1.924                       | 1.363                       | 1.850                 | 0.074    | 0.487    |
| H7                                                         | 32.207                | 32.112                | 1.380                 | 1.285                       | 1.043                       | 1.280                 | 0.005    | 0.237    |
| H8                                                         | 32.294                | 32.112                | 1.380                 | 1.198                       | 0.956                       | 1.280                 | 0.082    | 0.324    |
| H9                                                         | 32.278                | 32.112                | 1.380                 | 1.214                       | 0.971                       | 1.280                 | 0.066    | 0.309    |
| H10                                                        | 32.346                | 32.112                | 1.380                 | 1.146                       | 0.903                       | 1.280                 | 0.134    | 0.377    |
| H11                                                        | 32.268                | 32.112                | 1.380                 | 1.224                       | 0.982                       | 1.280                 | 0.056    | 0.298    |
| H12                                                        | 32.502                | 32.381                | 0.940                 | 0.820                       | 0.748                       | 0.840                 | 0.020    | 0.092    |
| reference compound: [C <sub>4</sub> mim][BF <sub>4</sub> ] |                       |                       |                       |                             | RMS, ppm                    |                       | 0.200    | 0.435    |
| level of theory: HF/6-311++g(d,p)                          |                       |                       |                       |                             | MAE, ppm                    |                       | 0.155    | 0.320    |

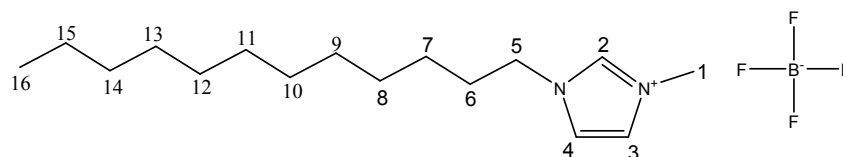

**Scheme S5. Structure of [C<sub>12</sub>mim][BF<sub>4</sub>] and Hydrogen Atoms Numbered.**

**Table S34. Calculated <sup>1</sup>H NMR Chemical Shifts of [C<sub>12</sub>mim][BF<sub>4</sub>]**

| H                                                          | $\sigma_{\text{cal}}$ | $\sigma_{\text{ref}}$ | $\delta_{\text{ref}}$ | $\delta_{\text{cal}}$ (RRS) | $\delta_{\text{cal}}$ (TMS) | $\delta_{\text{exp}}$ | AE (RRS) | AE (TMS) |
|------------------------------------------------------------|-----------------------|-----------------------|-----------------------|-----------------------------|-----------------------------|-----------------------|----------|----------|
| H2                                                         | 23.628                | 23.611                | 8.770                 | 8.753                       | 9.622                       | 9.090                 | 0.337    | 0.532    |
| H3                                                         | 26.196                | 26.173                | 7.630                 | 7.607                       | 7.054                       | 7.680                 | 0.073    | 0.626    |
| H4                                                         | 26.190                | 26.161                | 7.690                 | 7.662                       | 7.060                       | 7.750                 | 0.088    | 0.690    |
| H1                                                         | 29.323                | 29.315                | 4.040                 | 4.032                       | 3.927                       | 3.840                 | 0.192    | 0.087    |
| H5                                                         | 29.199                | 29.180                | 4.320                 | 4.301                       | 4.051                       | 4.150                 | 0.150    | 0.099    |
| H6                                                         | 31.894                | 31.880                | 1.930                 | 1.917                       | 1.356                       | 1.850                 | 0.067    | 0.494    |
| H7                                                         | 32.226                | 32.112                | 1.380                 | 1.266                       | 1.024                       | 1.310                 | 0.044    | 0.286    |
| H8                                                         | 32.315                | 32.112                | 1.380                 | 1.177                       | 0.935                       | 1.310                 | 0.133    | 0.375    |
| H9                                                         | 32.289                | 32.112                | 1.380                 | 1.203                       | 0.961                       | 1.310                 | 0.107    | 0.349    |
| H10                                                        | 32.368                | 32.112                | 1.380                 | 1.124                       | 0.882                       | 1.250                 | 0.126    | 0.368    |
| H11                                                        | 32.352                | 32.112                | 1.380                 | 1.140                       | 0.898                       | 1.250                 | 0.110    | 0.352    |
| H12                                                        | 32.387                | 32.112                | 1.380                 | 1.105                       | 0.863                       | 1.250                 | 0.145    | 0.387    |
| H13                                                        | 32.384                | 32.112                | 1.380                 | 1.108                       | 0.866                       | 1.250                 | 0.142    | 0.384    |
| H14                                                        | 32.384                | 32.112                | 1.380                 | 1.109                       | 0.866                       | 1.250                 | 0.141    | 0.384    |
| H15                                                        | 32.313                | 32.112                | 1.380                 | 1.179                       | 0.937                       | 1.250                 | 0.071    | 0.313    |
| H16                                                        | 32.532                | 32.381                | 0.940                 | 0.790                       | 0.718                       | 0.840                 | 0.050    | 0.122    |
| reference compound: [C <sub>4</sub> mim][BF <sub>4</sub> ] |                       |                       |                       |                             |                             | RMS, ppm              | 0.141    | 0.401    |
| level of theory: HF/6-311++g(d,p)                          |                       |                       |                       |                             |                             | MAE, ppm              | 0.124    | 0.365    |

## --Details of generalizing reference standard

A generalised standard might be proposed when the ILs have the weakly coordinating anions. if the IL [C<sub>2</sub>mim][BF<sub>4</sub>] were used as a reference standard, the proton NMR chemical shifts of ILs with weakly interacting anions could be well predicted. For example, the RMSs of [C<sub>4</sub>mim][PF<sub>6</sub>] and [C<sub>2</sub>mim][PF<sub>6</sub>] are 0.242 and 0.284, respectively.

Moreover, an order that representing the intensity of anion interactions might also be obtained by means of RMS analysis. That is, larger RMS usually indicates stronger interaction between the cation and the anion. According to the RMS results, the intensity order of the anion interaction is: [C<sub>4</sub>mim][PF<sub>6</sub>] (RMS is 0.242)  $\approx$  [C<sub>2</sub>mim][PF<sub>6</sub>] (0.284) < [C<sub>4</sub>mim][NTf<sub>2</sub>] (0.374) < [C<sub>4</sub>mim][Ots] (0.477)  $\approx$  [C<sub>4</sub>mim][MeSO<sub>4</sub>] (0.495) < [C<sub>4</sub>mim][TFA] (1.064) < [C<sub>4</sub>mim][OAc] (1.272).

**Table S35. Calculated <sup>1</sup>H NMR Chemical Shifts of [C<sub>2</sub>mim][PF<sub>6</sub>]**

| H                                                          | $\sigma_{\text{cal}}$ | $\sigma_{\text{ref}}$ | $\delta_{\text{ref}}$ | $\delta_{\text{cal}}$ (RRS) | $\delta_{\text{cal}}$ (TMS) | $\delta_{\text{exp}}$ | AE (RRS) | AE (TMS) |
|------------------------------------------------------------|-----------------------|-----------------------|-----------------------|-----------------------------|-----------------------------|-----------------------|----------|----------|
| H2                                                         | 22.010                | 22.864                | 8.550                 | 9.403                       | 9.544                       | 8.820                 | 0.583    | 0.724    |
| H3                                                         | 23.860                | 23.862                | 7.350                 | 7.351                       | 7.694                       | 7.290                 | 0.061    | 0.404    |
| H4                                                         | 23.655                | 23.937                | 7.410                 | 7.691                       | 7.899                       | 7.240                 | 0.451    | 0.659    |
| H1                                                         | 27.665                | 27.520                | 4.140                 | 3.995                       | 3.889                       | 4.260                 | 0.265    | 0.371    |
| H5                                                         | 27.378                | 27.574                | 3.840                 | 4.036                       | 4.176                       | 3.970                 | 0.066    | 0.206    |
| H6                                                         | 29.844                | 27.574                | 3.840                 | 1.569                       | 1.710                       | 1.590                 | 0.021    | 0.120    |
| H7                                                         | 29.844                | 27.574                | 3.840                 | 1.569                       | 1.710                       | 1.590                 | 0.021    | 0.120    |
| H8                                                         | 29.844                | 29.869                | 1.410                 | 1.435                       | 1.710                       | 1.590                 | 0.155    | 0.120    |
| reference compound: [C <sub>2</sub> mim][BF <sub>4</sub> ] |                       |                       |                       |                             | RMS, ppm                    |                       | 0.284    | 0.410    |
| level of theory: <b>m06-2x/aug-cc-pvdz</b>                 |                       |                       |                       |                             | MAE, ppm                    |                       | 0.203    | 0.340    |

**Table S36. Calculated <sup>1</sup>H NMR Chemical Shifts of [C<sub>4</sub>mim][PF<sub>6</sub>]**

| H                                                          | $\sigma_{\text{cal}}$ | $\sigma_{\text{ref}}$ | $\delta_{\text{ref}}$ | $\delta_{\text{cal}}$ (RRS) | $\delta_{\text{cal}}$ (TMS) | $\delta_{\text{exp}}$ | AE (RRS) | AE (TMS) |
|------------------------------------------------------------|-----------------------|-----------------------|-----------------------|-----------------------------|-----------------------------|-----------------------|----------|----------|
| H2                                                         | 22.952                | 22.864                | 8.550                 | 8.462                       | 8.603                       | 8.520                 | 0.058    | 0.083    |
| H3                                                         | 23.677                | 23.862                | 7.350                 | 7.535                       | 7.878                       | 7.490                 | 0.045    | 0.388    |
| H4                                                         | 23.737                | 23.937                | 7.410                 | 7.610                       | 7.817                       | 7.520                 | 0.090    | 0.297    |
| H1                                                         | 27.432                | 27.520                | 4.140                 | 4.229                       | 4.123                       | 4.250                 | 0.021    | 0.127    |
| H5                                                         | 27.193                | 27.574                | 3.840                 | 4.221                       | 4.362                       | 3.970                 | 0.251    | 0.392    |
| H6                                                         | 29.604                | 27.574                | 3.840                 | 1.810                       | 1.950                       | 1.930                 | 0.120    | 0.020    |
| H7                                                         | 30.634                | 27.574                | 3.840                 | 0.779                       | 0.920                       | 1.380                 | 0.601    | 0.460    |
| H8                                                         | 30.463                | 29.869                | 1.410                 | 0.816                       | 1.091                       | 0.940                 | 0.124    | 0.151    |
| reference compound: [C <sub>2</sub> mim][BF <sub>4</sub> ] |                       |                       |                       |                             | RMS, ppm                    |                       | 0.242    | 0.285    |
| level of theory: <b>m06-2x/aug-cc-pvdz</b>                 |                       |                       |                       |                             | MAE, ppm                    |                       | 0.164    | 0.240    |

**Table S37. Calculated  $^1\text{H}$  NMR Chemical Shifts of  $[\text{C}_4\text{mim}][\text{OTS}]$** 

| H                                                         | $\sigma_{\text{cal}}$ | $\sigma_{\text{ref}}$ | $\delta_{\text{ref}}$ | $\delta_{\text{cal}}$ (RRS) | $\delta_{\text{cal}}$ (TMS) | $\delta_{\text{exp}}$ | AE (RRS) | AE (TMS) |
|-----------------------------------------------------------|-----------------------|-----------------------|-----------------------|-----------------------------|-----------------------------|-----------------------|----------|----------|
| H2                                                        | 23.735                | 22.864                | 8.550                 | 7.679                       | 7.887                       | 8.530                 | 0.851    | 0.643    |
| H3                                                        | 24.339                | 23.862                | 7.350                 | 6.873                       | 7.284                       | 7.660                 | 0.787    | 0.376    |
| H4                                                        | 24.088                | 23.937                | 7.410                 | 7.258                       | 7.534                       | 7.290                 | 0.032    | 0.244    |
| H1                                                        | 28.291                | 27.520                | 4.140                 | 3.369                       | 3.331                       | 4.020                 | 0.651    | 0.689    |
| H5                                                        | 27.714                | 27.574                | 3.840                 | 3.700                       | 3.909                       | 3.780                 | 0.080    | 0.128    |
| H6                                                        | 29.546                | 27.574                | 3.840                 | 1.867                       | 2.076                       | 1.710                 | 0.157    | 0.366    |
| H7                                                        | 30.058                | 27.574                | 3.840                 | 1.356                       | 1.564                       | 1.220                 | 0.136    | 0.344    |
| H8                                                        | 30.463                | 29.869                | 1.410                 | 0.816                       | 1.159                       | 0.870                 | 0.054    | 0.289    |
| reference compound: $[\text{C}_2\text{mim}][\text{BF}_4]$ |                       |                       |                       |                             | RMS, ppm                    |                       | 0.477    | 0.424    |
| level of theory: <b>m06-2x/aug-cc-pvdz</b>                |                       |                       |                       |                             | MAE, ppm                    |                       | 0.343    | 0.385    |

**Table S38. Calculated  $^1\text{H}$  NMR Chemical Shifts of  $[\text{C}_4\text{mim}][\text{Tf}_2\text{N}]$** 

| H                                                         | $\sigma_{\text{cal}}$ | $\sigma_{\text{ref}}$ | $\delta_{\text{ref}}$ | $\delta_{\text{cal}}$ (RRS) | $\delta_{\text{cal}}$ (TMS) | $\delta_{\text{exp}}$ | AE (RRS) | AE (TMS) |
|-----------------------------------------------------------|-----------------------|-----------------------|-----------------------|-----------------------------|-----------------------------|-----------------------|----------|----------|
| H2                                                        | 21.832                | 22.864                | 8.550                 | 9.581                       | 9.790                       | 8.630                 | 0.951    | 1.160    |
| H3                                                        | 23.815                | 23.862                | 7.350                 | 7.396                       | 7.807                       | 7.540                 | 0.144    | 0.267    |
| H4                                                        | 23.675                | 23.937                | 7.410                 | 7.672                       | 7.947                       | 7.460                 | 0.212    | 0.487    |
| H1                                                        | 27.452                | 27.520                | 4.140                 | 4.208                       | 4.170                       | 4.240                 | 0.032    | 0.070    |
| H5                                                        | 27.533                | 27.574                | 3.840                 | 3.880                       | 4.089                       | 3.960                 | 0.080    | 0.129    |
| H6                                                        | 29.711                | 27.574                | 3.840                 | 1.702                       | 1.911                       | 1.920                 | 0.218    | 0.009    |
| H7                                                        | 30.306                | 27.574                | 3.840                 | 1.108                       | 1.317                       | 1.400                 | 0.292    | 0.084    |
| H8                                                        | 30.220                | 29.869                | 1.410                 | 1.059                       | 1.402                       | 0.970                 | 0.089    | 0.432    |
| reference compound: $[\text{C}_2\text{mim}][\text{BF}_4]$ |                       |                       |                       |                             | RMS, ppm                    |                       | 0.374    | 0.483    |
| level of theory: <b>m06-2x/aug-cc-pvdz</b>                |                       |                       |                       |                             | MAE, ppm                    |                       | 0.252    | 0.330    |

**Table S39. Calculated  $^1\text{H}$  NMR Chemical Shifts of  $[\text{C}_4\text{mim}][\text{OAC}]$** 

| H                                                         | $\sigma_{\text{cal}}$ | $\sigma_{\text{ref}}$ | $\delta_{\text{ref}}$ | $\delta_{\text{cal}}$ (RRS) | $\delta_{\text{cal}}$ (TMS) | $\delta_{\text{exp}}$ | AE (RRS) | AE (TMS) |
|-----------------------------------------------------------|-----------------------|-----------------------|-----------------------|-----------------------------|-----------------------------|-----------------------|----------|----------|
| H2                                                        | 17.735                | 22.864                | 8.550                 | 13.679                      | 13.819                      | 10.18                 | 3.499    | 3.639    |
| H3                                                        | 23.816                | 23.862                | 7.350                 | 7.396                       | 7.738                       | 7.880                 | 0.484    | 0.142    |
| H4                                                        | 23.709                | 23.937                | 7.410                 | 7.638                       | 7.845                       | 7.960                 | 0.322    | 0.115    |
| H1                                                        | 27.298                | 27.520                | 4.140                 | 4.362                       | 4.256                       | 4.200                 | 0.162    | 0.056    |
| H5                                                        | 26.954                | 27.574                | 3.840                 | 4.460                       | 4.601                       | 3.890                 | 0.570    | 0.711    |
| H6                                                        | 29.882                | 27.574                | 3.840                 | 1.532                       | 1.672                       | 1.600                 | 0.068    | 0.072    |
| H7                                                        | 30.178                | 27.574                | 3.840                 | 1.236                       | 1.376                       | 1.210                 | 0.026    | 0.166    |
| H8                                                        | 30.422                | 29.869                | 1.410                 | 0.857                       | 1.132                       | 0.840                 | 0.017    | 0.292    |
| reference compound: $[\text{C}_2\text{mim}][\text{BF}_4]$ |                       |                       |                       |                             | RMS, ppm                    |                       | 1.272    | 1.318    |
| level of theory: <b>m06-2x/aug-cc-pvdz</b>                |                       |                       |                       |                             | MAE, ppm                    |                       | 0.644    | 0.649    |

**Table S40. Calculated <sup>1</sup>H NMR Chemical Shifts of [C<sub>4</sub>mim][TFA]**

| H                                                          | $\sigma_{\text{cal}}$ | $\sigma_{\text{ref}}$ | $\delta_{\text{ref}}$ | $\delta_{\text{cal}}$ (RRS) | $\delta_{\text{cal}}$ (TMS) | $\delta_{\text{exp}}$ | AE (RRS) | AE (TMS) |
|------------------------------------------------------------|-----------------------|-----------------------|-----------------------|-----------------------------|-----------------------------|-----------------------|----------|----------|
| H2                                                         | 19.041                | 22.050                | 8.550                 | 11.558                      | 12.513                      | 8.670                 | 2.888    | 3.843    |
| H3                                                         | 24.257                | 24.210                | 7.350                 | 7.303                       | 7.297                       | 7.430                 | 0.128    | 0.133    |
| H4                                                         | 24.154                | 24.132                | 7.410                 | 7.389                       | 7.401                       | 7.390                 | 0.001    | 0.011    |
| H1                                                         | 27.841                | 27.727                | 4.140                 | 4.026                       | 3.713                       | 4.140                 | 0.114    | 0.427    |
| H5                                                         | 27.554                | 26.761                | 3.840                 | 3.047                       | 4.000                       | 3.850                 | 0.803    | 0.150    |
| H6                                                         | 29.850                | 30.177                | 1.410                 | 1.736                       | 1.704                       | 1.790                 | 0.054    | 0.086    |
| H7                                                         | 30.164                | 30.177                | 1.410                 | 1.423                       | 1.390                       | 1.260                 | 0.163    | 0.130    |
| H8                                                         | 30.596                | 30.177                | 1.410                 | 0.991                       | 0.959                       | 0.860                 | 0.131    | 0.099    |
| reference compound: [C <sub>2</sub> mim][BF <sub>4</sub> ] |                       |                       |                       |                             | RMS, ppm                    |                       | 1.064    | 1.370    |
| level of theory: <b>m06-2x/aug-cc-pvdz</b>                 |                       |                       |                       |                             | MAE, ppm                    |                       | 0.535    | 0.610    |

**Table S41. Calculated <sup>1</sup>H NMR Chemical Shifts of [C<sub>4</sub>mim][MeSO<sub>4</sub>]**

| H                                                          | $\sigma_{\text{cal}}$ | $\sigma_{\text{ref}}$ | $\delta_{\text{ref}}$ | $\delta_{\text{cal}}$ (RRS) | $\delta_{\text{cal}}$ (TMS) | $\delta_{\text{exp}}$ | AE (RRS) | AE (TMS) |
|------------------------------------------------------------|-----------------------|-----------------------|-----------------------|-----------------------------|-----------------------------|-----------------------|----------|----------|
| H2                                                         | 20.987                | 22.864                | 8.550                 | 10.426                      | 10.512                      | 9.418                 | 1.008    | 1.094    |
| H3                                                         | 23.831                | 23.862                | 7.350                 | 7.381                       | 7.668                       | 7.630                 | 0.250    | 0.038    |
| H4                                                         | 23.681                | 23.937                | 7.410                 | 7.666                       | 7.818                       | 7.580                 | 0.086    | 0.238    |
| H1                                                         | 27.482                | 27.520                | 4.140                 | 4.178                       | 4.016                       | 4.260                 | 0.082    | 0.244    |
| H5                                                         | 27.232                | 27.574                | 3.840                 | 4.182                       | 4.267                       | 3.370                 | 0.812    | 0.897    |
| H6                                                         | 29.986                | 27.574                | 3.840                 | 1.427                       | 1.512                       | 1.881                 | 0.454    | 0.369    |
| H7                                                         | 30.113                | 27.574                | 3.840                 | 1.301                       | 1.386                       | 1.352                 | 0.052    | 0.034    |
| H8                                                         | 30.410                | 29.869                | 1.410                 | 0.869                       | 1.089                       | 0.935                 | 0.066    | 0.154    |
| reference compound: [C <sub>2</sub> mim][BF <sub>4</sub> ] |                       |                       |                       |                             | RMS, ppm                    |                       | 0.4956   | 0.5337   |
| level of theory: <b>m06-2x/aug-cc-pvdz</b>                 |                       |                       |                       |                             | MAE, ppm                    |                       | 0.3511   | 0.3833   |

## --Details on Case Study

In the first stage of this case study, the structure of  $[\text{NH}_2\text{-Emim}][\text{BF}_4]\text{-SO}_2$  and  $[\text{NH}_2\text{-Emim}][\text{BF}_4]$  were optimized at the level of theory  $\text{m062x/aug-cc-pvdz}$ . Vibrational analysis (frequency calculation) was followed after geometry optimization. The absence of negative or imaginary frequencies indicated that the structures were at a global minimum. In order to investigate the reaction between  $\text{SO}_2$  and  $[\text{NH}_2\text{-Emim}][\text{BF}_4]$ ,  $\text{SO}_2$  molecule was used to attack the different position of  $[\text{NH}_2\text{-Emim}][\text{BF}_4]$  and thus optimized the possible geometric configurations (Figure S26-S27).

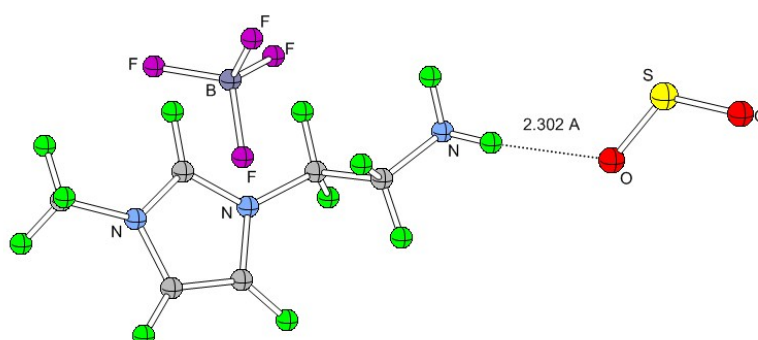

**Figure S26.**  $\text{SO}_2$  molecule absorb the H of  $-\text{NH}_2-$  in  $[\text{NH}_2\text{-Emim}][\text{BF}_4]$  (configuration 1)

First, the oxygen atom on  $\text{SO}_2$  molecule was supposed to absorb the H of  $-\text{NH}_2-$  in  $[\text{NH}_2\text{-Emim}][\text{BF}_4]$ , as shown in Figure S26. Meanwhile, the  $^1\text{H}$  NMR chemical shifts was calculated according to this optimized structure (Table S42).

**Table S42. Calculated  $^1\text{H}$  NMR Chemical Shifts of  $[\text{NH}_2\text{-Emim}][\text{BF}_4]\text{-SO}_2$  (Configuration 1)**

| H position                                                   | $\sigma_{\text{cal}}$ | $\sigma_{\text{ref}}$ | $\delta_{\text{ref}}$ | $\delta_{\text{cal}}$ (RRS) | $\delta_{\text{cal}}$ (TMS) | $\delta_{\text{exp}}$ | AE (RRS) | AE (TMS) |
|--------------------------------------------------------------|-----------------------|-----------------------|-----------------------|-----------------------------|-----------------------------|-----------------------|----------|----------|
| N-CH-N                                                       | 22.749                | 23.204                | 9.12                  | 9.57                        | 8.87                        | 9.19                  | 0.385    | 0.317    |
| H in ring                                                    | 23.765                | 23.844                | 7.45                  | 7.53                        | 7.86                        | 7.45                  | 0.079    | 0.407    |
| H in ring                                                    | 23.050                | 23.858                | 7.200                 | 8.01                        | 8.57                        | 8.100                 | 0.093    | 0.472    |
| ring- $\text{CH}_3$                                          | 27.206                | 27.434                | 3.72                  | 3.95                        | 4.42                        | 3.72                  | 0.228    | 0.696    |
| ring- $\text{CH}_2-$                                         | 27.500                | 27.389                | 3.41                  | 3.30                        | 4.12                        | 3.41                  | 0.110    | 0.713    |
| $-\text{CH}_2-$                                              | 28.473                | 28.570                | 2.77                  | 2.87                        | 3.15                        | 2.35                  | 0.517    | 0.800    |
| $-\text{NH}_2$                                               | 29.264                | 30.849                | 2.07                  | 3.65                        | 2.36                        | 3.35                  | 0.305    | 0.992    |
| $-\text{NH}_2$                                               | 30.780                | 30.160                | 2.07                  | 1.45                        | 0.84                        | 1.45                  | 0.000    | 0.608    |
| Reference Compound: $[\text{NH}_2\text{-Emim}][\text{BF}_4]$ |                       |                       |                       |                             |                             | RMS                   | 0.271    | 0.563    |
| level of theory: <b>m062x-aug-cc- pvdz</b>                   |                       |                       |                       |                             |                             | MAE                   | 0.215    | 0.527    |



Second, SO<sub>2</sub> molecule was supposed to absorb the H of –CH<sub>3</sub> in [NH<sub>2</sub>-Emim][BF<sub>4</sub>]. The optimized configuration of this proposed reaction was illustrated in Figure S27, and the data of proton chemical shifts was collected in Table S43.

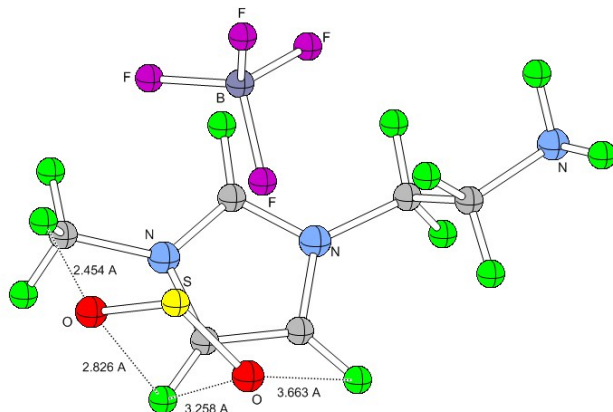

**Figure S27.** Configuration 2 of [NH<sub>2</sub>-Emim][BF<sub>4</sub>]

**Table S43.** Calculated <sup>1</sup>H NMR Chemical Shifts of [NH<sub>2</sub>-Emim][BF<sub>4</sub>]-SO<sub>2</sub> (Configuration 2)

| H position                                                    | $\sigma_{\text{cal}}$ | $\sigma_{\text{ref}}$ | $\delta_{\text{ref}}$ | $\delta_{\text{cal}}$ (RRS) | $\delta_{\text{cal}}$ (TMS) | $\delta_{\text{exp}}$ | AE (RRS) | AE (TMS) |
|---------------------------------------------------------------|-----------------------|-----------------------|-----------------------|-----------------------------|-----------------------------|-----------------------|----------|----------|
| N–CH–N                                                        | 23.034                | 23.204                | 9.12                  | 9.29                        | 8.59                        | 9.19                  | 0.099    | 0.602    |
| H in ring                                                     | 23.535                | 23.844                | 7.45                  | 7.76                        | 8.09                        | 7.45                  | 0.309    | 0.637    |
| H in ring                                                     | 23.981                | 23.858                | 7.20                  | 7.08                        | 7.64                        | 8.10                  | 1.024    | 0.459    |
| ring-CH <sub>3</sub>                                          | 27.619                | 27.434                | 3.72                  | 3.53                        | 4.00                        | 3.72                  | 0.185    | 0.283    |
| ring-CH <sub>2</sub> –                                        | 27.478                | 27.389                | 3.41                  | 3.32                        | 4.14                        | 3.41                  | 0.089    | 0.735    |
| –CH <sub>2</sub> –                                            | 28.428                | 28.570                | 2.77                  | 2.91                        | 3.19                        | 2.35                  | 0.562    | 0.845    |
| –NH <sub>2</sub>                                              | 30.371                | 30.849                | 2.07                  | 2.55                        | 3.19                        | 3.35                  | 0.802    | 0.155    |
| –NH <sub>2</sub>                                              | 30.761                | 30.160                | 2.07                  | 1.47                        | 0.86                        | 1.45                  | 0.019    | 0.589    |
| Reference Compound: [NH <sub>2</sub> -Emim][BF <sub>4</sub> ] |                       |                       |                       |                             |                             | RMS                   | 0.519    | 0.579    |
| level of theory: <b>m062x-aug-cc-pvdz</b>                     |                       |                       |                       |                             |                             | MAE                   | 0.386    | 0.538    |

Another configuration was also proposed, in which the sulfur atom of SO<sub>2</sub> molecule was attracted by the nitrogen atom of NH<sub>2</sub>–. The data and the configuration were listed in Table S44 and Figure S28, respectively.

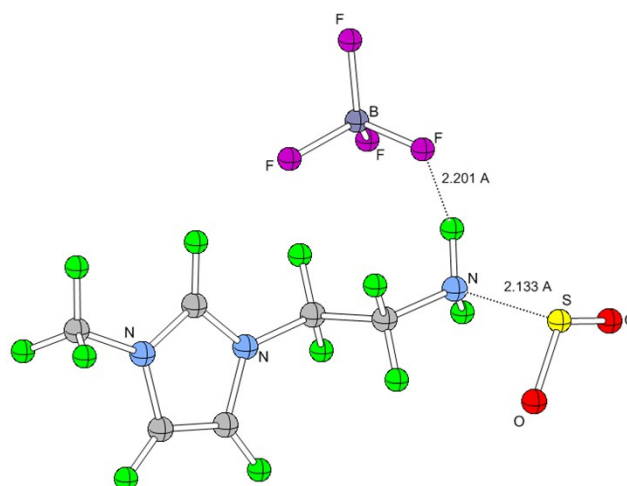

**Figure S28.** Configuration 3 of  $[\text{NH}_2\text{-Emim}][\text{BF}_4]$

**Table S44.** Calculated  $^1\text{H}$  NMR Chemical Shifts of  $[\text{NH}_2\text{-Emim}][\text{BF}_4]\text{-SO}_2$  (Configuration 3)

| H position                                                   | $\sigma_{\text{cal}}$ | $\sigma_{\text{ref}}$ | $\delta_{\text{ref}}$ | $\delta_{\text{cal}}$ (RRS) | $\delta_{\text{cal}}$ (TMS) | $\delta_{\text{exp}}$ | AE (RRS) | AE (TMS) |
|--------------------------------------------------------------|-----------------------|-----------------------|-----------------------|-----------------------------|-----------------------------|-----------------------|----------|----------|
| N-CH-N                                                       | 22.361                | 23.204                | 9.12                  | 9.96                        | 9.26                        | 9.19                  | 0.773    | 0.072    |
| H in ring                                                    | 23.665                | 23.844                | 7.45                  | 7.63                        | 7.96                        | 7.45                  | 0.179    | 0.508    |
| H in ring                                                    | 23.650                | 23.858                | 7.20                  | 7.41                        | 7.97                        | 8.10                  | 0.693    | 0.128    |
| ring-CH <sub>3</sub>                                         | 27.257                | 27.434                | 3.72                  | 3.90                        | 4.37                        | 3.72                  | 0.177    | 0.645    |
| ring-CH <sub>2</sub> -                                       | 27.025                | 27.389                | 3.41                  | 3.77                        | 4.60                        | 3.41                  | 0.364    | 1.187    |
| -CH <sub>2</sub> -                                           | 28.582                | 28.570                | 2.77                  | 2.76                        | 3.04                        | 2.35                  | 0.408    | 0.690    |
| -NH <sub>2</sub>                                             | 25.654                | 30.849                | 2.07                  | 7.26                        | 3.04                        | 3.35                  | 3.915    | 0.310    |
| -NH <sub>2</sub>                                             | 30.010                | 30.160                | 2.07                  | 2.22                        | 1.61                        | 1.45                  | 0.771    | 0.163    |
| Reference Compound: $[\text{NH}_2\text{-Emim}][\text{BF}_4]$ |                       |                       |                       |                             |                             | RMS                   | 1.473    | 0.581    |
| level of theory: <b>m062x-aug-cc-pvdz</b>                    |                       |                       |                       |                             |                             | MAE                   | 0.910    | 0.463    |

However, only the first configuration of  $[\text{NH}_2\text{-Emim}][\text{BF}_4]\text{-SO}_2$  and its  $^1\text{H}$  NMR chemical shifts are most consistent with the experimental values. The predicted spectral data reveal that the proton chemical shifts of  $-\text{NH}_2$  group were significantly changed after the  $\text{SO}_2$  absorption: from 2.07 to 1.45 and to 3.35 ppm, respectively. Meanwhile, the chemical shift of H (unsaturated C-H in the imidazole ring, with N-CH<sub>2</sub>-CH<sub>2</sub>-NH<sub>2</sub> connected to the right) moved downfield from 7.20 to 8.10 ppm due to the impact of  $[\text{BF}_4]^-$  anion. Particularly, the study shows that the  $[\text{BF}_4]^-$  anion of  $[\text{NH}_2\text{-Emim}][\text{BF}_4]\text{-SO}_2$  was not combined with the H of  $\text{NH}_2$ , which only moved to the center of imidazolium ring and over the imidazolium plane, as Figure S26 shown.
